# Supplementary material for: Genome-Wide Insight into Profound Effect of Carbon Catabolite Repressor (Cre1) on the Insect-Pathogenic Lifecycle of Beauveria bassiana
Source: MDPI journal article supplement (doi:10.3390/jof7110895), 2021-10-23
Supplement: s1 [file s1]

## **Genome-Wide Insight into Profound Effect of Carbon Catabolite Repressor (Cre1) on the Insect-Pathogenic Lifecycle of *Beauveria bassiana***

Rehab Abdelmonem Mohamed, Kang Ren, Ya-Ni Mou, Sheng-Hua Ying, Ming-Guang Feng\*

MOE Laboratory of Biosystems Homeostasis & Protection, College of Life Sciences, Zhejiang University, Hangzhou, Zhejiang, 310058, China

\* Correspondence to Ming-Guang Feng, mgfeng@zju.edu.cn

### **Contents:**

**Figure S1.** Generation and identification of *cre1* mutants in *B. bassiana*, page 2

**Table S1.** Paired primers used for targeted gene manipulation of *cre1* in *B. bassiana*, page 2

**Table S2.** Paired primers used for transcriptional profiling of genes for insight into altered phenotypes of  $\Delta cre1$  and/or validity of its transcriptome in *B. bassiana*, page 3

**Table S3.** A list of 1881 genes dysregulated in the  $\Delta cre1$  mutant of *B. bassiana*, pages 4 to 34

**Table S4.** Counts of  $\Delta cre1$ -specific dysregulated genes enriched to GO terms in three function classes of *B. bassiana* at the significant level of  $p < 0.05$ , pages 35 to 36

**Table S5.** Counts of  $\Delta cre1$ -specific dysregulated genes enriched to the KEGG pathways of *B. bassiana* at the significant level of  $p < 0.05$ , page 37

**Table S6.** Lists of  $\Delta cre1$ -specific dysregulated genes associated with phenotypic changes and involved in crucial cellular processes and events of *B. bassiana*, pages 38 to 50

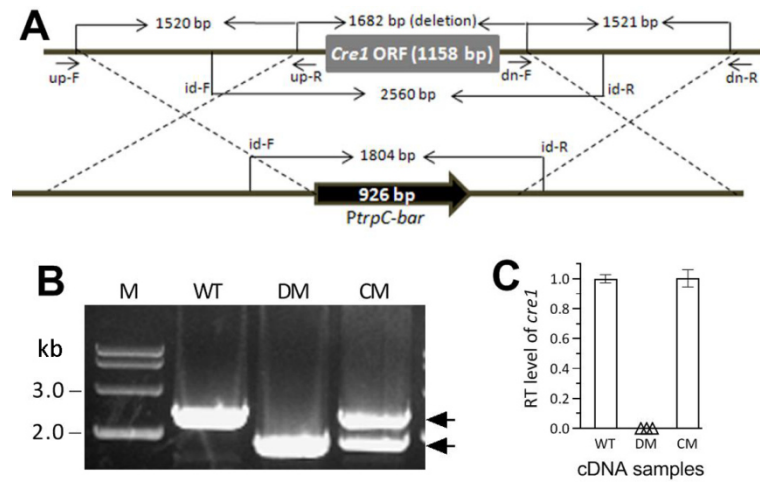

**Figure S1.** Generation and identification of *cre1* mutants in *B. bassiana*. **(A)** Schematic diagram for the strategy of *cre1* deletion. Note that a 1682-bp fragment containing the full-length coding nucleotide sequence (ORF) of *cre1* and its flanking regions (524 bp) was expected to be deleted from the fungal wild-type strain (WT). **(B, C)** The *cre1* mutants (DM: deletion mutant  $\Delta cre1$ ; CM: complementation mutant  $\Delta cre1::cre1$ ) identified through PCR and qPCR analyses with paired primers (Table S1) respectively. M, DNA ladder. The arrows indicate PCR-detected fragments of 2560 and 1804 bp for WT and DM, respectively and both of them for CM. The PCR-detected fragments demonstrate that *cre1* was deleted as expected ( $2560 + 926 - 1804 = 1682$  bp). The qPCR analysis of cDNA samples derived from 3-day-old SDAY cultures confirms that transcriptional expression of *cre1* is completely abolished in DM and restored to the WT level in CM generated through targeted gene complementation. Error bars: standard deviations of the means from three independent cDNA samples analyzed via qPCR.

**Table S1.** Paired primers used for targeted gene manipulation of *cre1* in *B. bassiana*.

| Primers    | Paired sequences (5'-3') <sup>a</sup>                                                                                            | Purpose <sup>b</sup>                                                   |
|------------|----------------------------------------------------------------------------------------------------------------------------------|------------------------------------------------------------------------|
| CreA-G-F/R | <u>CATGGACGAGCTGTACAAGTAAATGGCTTCGCCGCC</u> / <u>GTAACGTAAAGTGGATCGT</u><br><u>CGACCTAAGCGCATCCATCAAGTC</u>                      | Cloning <i>cre1</i> cDNA (1158 bp) for fusion to <i>GFP</i>            |
| CreAup-F/R | <u>ACGAGCTGTACAAGTAACCCGGGGCGGTGTTGACTCGTTGA</u> / <u>TGGCTGCAGGTCGA</u><br><u>CGGATCCGAGAGCGTGCGTTGTAATG</u>                    | Cloning <i>cre1</i> 5' fragment (1520 bp) for recombination/deletion   |
| CreAdn-F/R | <u>GACCCATGGCTCGAGTCTAGAAGGAACGAATTAGGGACGAA</u> / <u>GGTGGTGGTGGCTA</u><br><u>GCGTTAACGGGCACGGCACTGAAGTA</u>                    | Cloning <i>cre1</i> 3' fragment (1521 bp) for recombination/deletion   |
| CreAcm-F/R | <u>ATCCGTCGACCTGCAGCCAAGCTT</u> <u>CATCCATCTAGCCATCCAT</u> / <u>ACACTAGTCAGATC</u><br><u>TTCTAGTGT</u> <u>TGTCTGACCGACGCTTTC</u> | Cloning full-length <i>cre1</i> sequence for complementation (3639 bp) |
| pCreA-F/R  | GCAATCAGGTCTCATCC / TCTGACCGACGCTTCTA                                                                                            | PCR detecting <i>cre1</i>                                              |
| qCreA-F/R  | AGTGCCCTCTGTGCGATAAG / ACCGCTGTGGGCATTGTAG                                                                                       | qPCR detecting <i>cre1</i>                                             |
| qACT-F/R   | GGCAACATTGTCATGTCTGG / TTTGCTGGAAGGTGGATAGG                                                                                      | qPCR detecting $\beta$ -actin gene                                     |

<sup>a</sup> Underlined regions denote restriction enzyme sites for *cre1* fused to N-terminus of *GFP* (*Bam*HI/*Xma*I), homogenous recombination of the *bar*-separated 5' and 3' fragments to delete *cre1* (*Eco*RI/*Hind*III and *Xba*I/*Hpa*I), or the gateway exchange fragments for targeted gene complementation.

<sup>b</sup> PCR detection aimed at the respective fragments of 2560 bp for WT and 1808 bp for  $\Delta cre1$ , and both fragments for  $\Delta cre1::cre1$ .

**Table S2.** Paired primers used for transcriptional profiling of genes for insight into altered phenotypes of  $\Delta creI$  and/or validity of its transcriptome in *B. bassiana*.

| Gene                                                                    | Tag locus* | Annotation                               | Sequences (5'–3') of paired primers              |
|-------------------------------------------------------------------------|------------|------------------------------------------|--------------------------------------------------|
| <b>Involved in asexual development (conidiation)</b>                    |            |                                          |                                                  |
| <i>briA</i>                                                             | BBA_07544  | Developmental activator BriA             | GATGGATGACAAGTGCATG / AAATCGCACGAGAAACGAT        |
| <i>abaA</i>                                                             | BBA_00300  | Developmental activator AbaA             | GCAAGTCTCCAGCCATAT / CTCCTCTCGTCATAGTAGTC        |
| <i>wetA</i>                                                             | BBA_06126  | Developmental activator WetA             | ATGCGGTACTACAGCCAAGG / GAGTTCTGCTGGCTACTGG       |
| <i>vosA</i>                                                             | BBA_01023  | Developmental activator VosA             | ACTCATGGGCTCATTGGTGG / CCGGCAAGAGAGATCCGAAA      |
| <i>frq1</i>                                                             | BBA_01528  | Frequency protein Frq1                   | AACTCAATGGCATCAGAT / TATCCTTGTCCTCATAG           |
| <i>vvd</i>                                                              | BBA_02876  | Blue-light receptor VVD                  | ATTGCCAACTACAAGAAGA / GGAAGCCAACAGAGTATT         |
| <b>Involved in conidial hydrophobicity and adherence</b>                |            |                                          |                                                  |
| <i>hyd1</i>                                                             | BBA_03015  | Class I hydrophobin Hyd1                 | ATGGTGAAAGGATCTGCAC / TGGGAAAGAAGACCATCAGC       |
| <i>Hyd2</i>                                                             | BBA_06599  | Class II hydrophobin Hyd2                | TGTCAAGACTGGCGACATTT / ATGGGACAAGCTGGTTGAG       |
| <i>hyd3</i>                                                             | BBA_00530  | Hydrophobin-like protein Hyd3            | CTGGCCACCCTACTTCTGTC / TCTGGCTAGGGGTAGAGCAA      |
| <i>hyd4</i>                                                             | BBA_03071  | Hydrophobin-like protein Hyd4            | AGTGCTGTGCCACTGACATC / GGGGTCATGCAAAAGAGACT      |
| <i>hyd5</i>                                                             | BBA_02999  | Hydrophobin-like protein Hyd5            | GAGGCTCGCACTGATAAAGC / CAACCTTGGCACAATTTCC       |
| <b>Involved in antioxidant response</b>                                 |            |                                          |                                                  |
| <i>cat1</i>                                                             | BBA_06186  | Spore-specific catalase CatA             | CAACAACATCCCCGTCTTCT / ACACCAAATCCCTGCATCAT      |
| <i>cat2</i>                                                             | BBA_05603  | Secreted catalase CatB                   | CTCGTACTTGGACACGCAGA / TTGTTGAGGGTGTGTTGGTGA     |
| <i>cat3</i>                                                             | BBA_09109  | Cytoplasmic catalase CatC                | CGCACAAGAGAACCTTCACA / AATGGTTGTGTGTCGCTGA       |
| <i>cat4</i>                                                             | BBA_09760  | Secreted peroxidase/catalase CatD        | TCTCTGCTCTGGGCTGATCT / CTGCTGGGACAACTCAT         |
| <i>cat5</i>                                                             | BBA_09338  | Peroxisomal catalase CatP                | CAAGGATTCTCTGGCAAGC / AGCAATGAGAGCAACGGTCT       |
| <i>cat6</i>                                                             | BBA_06567  | Catalase-like protein, heme-dependent    | TTTCCGTGAGGACATTCACA / AGGACTTTTCGTCCCATCT       |
| <i>sod1</i>                                                             | BBA_02311  | Cytosolic Cu/ZnSOD                       | GCGGCTTCCACATCCACCTTTG / GGTCCAGCGTTGCCAGTCTTGAG |
| <i>sod2</i>                                                             | BBA_09706  | Cytosolic MnSOD                          | CCAGTGTTTGGCATTGACATG / TCAGCCGTCTCCAGTTGATG     |
| <i>sod3</i>                                                             | BBA_09382  | Mitochondrial MnSOD                      | TCTCCGGCAAGATTATGGAGC / TTGGCGTATTCTTGGCCT       |
| <i>sod4</i>                                                             | BBA_04317  | Mitochondrial FeSOD                      | CGAGATGGTCTTACGGCTTCAG / GCTCCAGGTGTTGAGGCATAG   |
| <i>sod5</i>                                                             | BBA_01984  | Cell wall-anchored Cu/ZnSOD              | CGGCGACCTCAGCGGCAAGTAC / GCCAGCAACACAGGGACCGTAGG |
| <b>Involved in cell wall composition and transcriptional regulation</b> |            |                                          |                                                  |
| <i>cfp</i>                                                              | BBA_02121  | Cysteine-free protein CFP                | ATGAAGTCTCATCTGCTCTCCTTG / AGGCGGTTGGCAATATCGT   |
| <i>mkk1</i>                                                             | BBA_01095  | MAP kinase kinase 1 Mkk1                 | GGTGAAGCCAACACCTTCAT / GCAAGTCAATCAGACCAGCA      |
| <i>CWP</i>                                                              | BBA_09174  | cell wall protein CWP                    | CTCTGAACATGCCGGAGTT / CCAAAGGGACCAGCGAAA         |
| <i>TF1</i>                                                              | BBA_08967  | fungal zinc cluster transcription factor | CTCTAGAGTTCTCGACGAGCAGC / GCCCTCGTATCCGTCTGTTG   |
| <i>TF2</i>                                                              | BBA_05290  | fungal specific transcription factor     | ATAATGACGACTTGCGGGCTAA / GGATTGGTGGGTGAGTTGGAC   |

\* Gene accession codes of *B. bassiana* genome under the NCBI accession NL\_ADAH00000000.

**Table S3.** A list of 1881 genes dysregulated in the  $\Delta creI$  mutant of *B. bassiana*.

| Gene_ID  | Genomic tag_locus | $\Delta creI$ vs. WT |           |           | Regulated | Annotation                                        |
|----------|-------------------|----------------------|-----------|-----------|-----------|---------------------------------------------------|
|          |                   | $\log_2 R$           | $p$ value | $q$ value |           |                                                   |
| 19892792 | BBA_09780         | -18.52               | 3.30E-129 | 5.38E-127 | down      | hypothetical protein BBA_09780                    |
| 19891689 | BBA_08677         | -15.50               | 9.93E-36  | 1.99E-34  | down      | hypothetical protein BBA_08677                    |
| 19891196 | BBA_08184         | -15.30               | 1.94E-56  | 6.73E-55  | down      | glutathione-s-transferase                         |
| 19893112 | BBA_10100         | -14.83               | 4.20E-51  | 1.27E-49  | down      | hypothetical protein BBA_10100                    |
| 19889278 | BBA_06266         | -14.20               | 7.93E-57  | 2.80E-55  | down      | Cytochrome P450 CYP570H1                          |
| 19889649 | BBA_06637         | -14.07               | 1.10E-50  | 3.27E-49  | down      | hypothetical protein BBA_06637                    |
| 19892923 | BBA_09911         | -12.81               | 1.68E-33  | 3.11E-32  | down      | hypothetical protein BBA_09911                    |
| 19885642 | BBA_02630         | -12.23               | 1.10E-76  | 6.19E-75  | down      | bassianolide nonribosomal peptide synthetase      |
| 19890306 | BBA_07294         | -11.96               | 0.00E+00  | 0.00E+00  | down      | protease S8 tripeptidyl peptidase I (cln2)        |
| 19888148 | BBA_05136         | -10.45               | 0.00E+00  | 0.00E+00  | down      | carbon catabolite repressor                       |
| 19890303 | BBA_07291         | -10.10               | 0.00E+00  | 0.00E+00  | down      | peptidase A4 family protein                       |
| 19891234 | BBA_08222         | -9.98                | 6.54E-37  | 1.35E-35  | down      | nonribosomal peptide synthase, putative           |
| 19893262 | BBA_10250         | -9.65                | 3.40E-55  | 1.16E-53  | down      | hypothetical protein BBA_10250                    |
| 19891192 | BBA_08180         | -9.48                | 0.00E+00  | 0.00E+00  | down      | MFS multidrug resistance transporter, putative    |
| 19891484 | BBA_08472         | -8.79                | 3.73E-82  | 2.43E-80  | down      | steroid monooxygenase (CpmA), putative            |
| 19889580 | BBA_06568         | -8.66                | 3.42E-152 | 7.33E-150 | down      | hypothetical protein BBA_06568                    |
| 19892699 | BBA_09687         | -8.63                | 2.21E-164 | 5.50E-162 | down      | hypothetical protein BBA_09687                    |
| 19892788 | BBA_09776         | -8.26                | 8.98E-228 | 5.65E-225 | down      | hypothetical protein BBA_09776                    |
| 19886646 | BBA_03634         | -8.22                | 1.25E-186 | 4.22E-184 | down      | hypothetical protein BBA_03634                    |
| 19885425 | BBA_02413         | -8.22                | 7.42E-60  | 2.83E-58  | down      | hypothetical protein BBA_02413                    |
| 19885469 | BBA_02457         | -8.17                | 9.97E-212 | 5.54E-209 | down      | agglutinin isolectin VI precursor                 |
| 19891803 | BBA_08791         | -8.16                | 0.00E+00  | 0.00E+00  | down      | alkaline serine protease AorO                     |
| 19890649 | BBA_07637         | -8.05                | 8.44E-156 | 1.90E-153 | down      | hypothetical protein BBA_07637                    |
| 19892188 | BBA_09176         | -8.01                | 1.67E-219 | 9.85E-217 | down      | alkaline serine protease AorO                     |
| 19889313 | BBA_06301         | -7.96                | 4.05E-71  | 2.04E-69  | down      | hypothetical protein BBA_06301                    |
| 19889591 | BBA_06579         | -7.84                | 8.16E-110 | 8.75E-108 | down      | hypothetical protein BBA_06579                    |
| 19888236 | BBA_05224         | -7.64                | 7.15E-62  | 2.89E-60  | down      | protein phosphatase 2C                            |
| 19887217 | BBA_04205         | -7.56                | 6.72E-178 | 2.12E-175 | down      | major facilitator superfamily transporter         |
| 19890517 | BBA_07505         | -7.48                | 1.90E-170 | 5.12E-168 | down      | peptidase A4 family protein                       |
| 19892546 | BBA_09534         | -7.26                | 5.90E-53  | 1.88E-51  | down      | hypothetical protein BBA_09534                    |
| 19893111 | BBA_10099         | -7.22                | 1.45E-66  | 6.41E-65  | down      | hypothetical protein BBA_10099                    |
| 19890652 | BBA_07640         | -7.11                | 1.66E-161 | 4.02E-159 | down      | tyrosinase-like protein                           |
| 19890702 | BBA_07690         | -7.10                | 8.95E-107 | 9.49E-105 | down      | hypothetical protein BBA_07690                    |
| 19890648 | BBA_07636         | -6.98                | 9.50E-68  | 4.40E-66  | down      | C6 transcription factor                           |
| 19886825 | BBA_03813         | -6.60                | 1.34E-208 | 6.31E-206 | down      | late sexual development protein                   |
| 19891730 | BBA_08718         | -6.58                | 3.67E-44  | 9.30E-43  | down      | ankyrin repeat protein                            |
| 19886647 | BBA_03635         | -6.52                | 1.46E-229 | 9.82E-227 | down      | IDI-2 precursor                                   |
| 19884195 | BBA_01183         | -6.31                | 1.20E-30  | 2.04E-29  | down      | protease inhibitor (Tfs1)                         |
| 19892567 | BBA_09555         | -6.20                | 4.51E-82  | 2.92E-80  | down      | hypothetical protein BBA_09555                    |
| 19892091 | BBA_09079         | -6.19                | 1.30E-66  | 5.81E-65  | down      | major facilitator superfamily protein             |
| 19892308 | BBA_09296         | -6.05                | 1.22E-112 | 1.35E-110 | down      | hypothetical protein BBA_09296                    |
| 19883095 | BBA_00083         | -5.80                | 1.29E-114 | 1.48E-112 | down      | hypothetical protein BBA_00083                    |
| 19891804 | BBA_08792         | -5.66                | 1.68E-177 | 5.10E-175 | down      | DUF300 domain protein, putative                   |
| 19890626 | BBA_07614         | -5.57                | 1.46E-38  | 3.18E-37  | down      | hypothetical protein BBA_07614                    |
| 19884913 | BBA_01901         | -5.55                | 1.35E-49  | 3.91E-48  | down      | RBP protein                                       |
| 19891758 | BBA_08746         | -5.54                | 1.42E-91  | 1.22E-89  | down      | glutathione-S-transferase theta, GST              |
| 19888192 | BBA_05180         | -5.49                | 2.30E-176 | 6.78E-174 | down      | hypothetical protein BBA_05180                    |
| 19891233 | BBA_08221         | -5.42                | 9.10E-67  | 4.11E-65  | down      | 4-coumarate-CoA ligase                            |
| 19890651 | BBA_07639         | -5.42                | 5.24E-120 | 6.69E-118 | down      | hypothetical protein BBA_07639                    |
| 19885938 | BBA_02926         | -5.37                | 1.54E-184 | 5.03E-182 | down      | cupin domain protein                              |
| 19891384 | BBA_08372         | -5.32                | 1.53E-207 | 6.86E-205 | down      | hypothetical protein BBA_08372                    |
| 19886719 | BBA_03707         | -5.29                | 1.26E-24  | 1.72E-23  | down      | multiple ankyrin repeats single kh domain protein |
| 19886794 | BBA_03782         | -5.28                | 1.53E-166 | 3.91E-164 | down      | putative hydrolase                                |
| 19889451 | BBA_06439         | -5.18                | 2.98E-102 | 3.02E-100 | down      | CipC protein                                      |
| 19886828 | BBA_03816         | -5.18                | 4.42E-74  | 2.36E-72  | down      | lectin-like protein                               |
| 19887987 | BBA_04975         | -5.14                | 3.62E-211 | 1.90E-208 | down      | AMP-binding enzyme                                |

|          |           |       |           |           |      |                                             |
|----------|-----------|-------|-----------|-----------|------|---------------------------------------------|
| 19890650 | BBA_07638 | -5.12 | 3.79E-68  | 1.80E-66  | down | hypothetical protein BBA_07638              |
| 19886483 | BBA_03471 | -5.10 | 4.56E-41  | 1.07E-39  | down |                                             |
| 19884249 | BBA_01237 | -5.07 | 3.29E-193 | 1.24E-190 | down | Cytochrome P450 CYP620C2                    |
| 19890679 | BBA_07667 | -5.07 | 9.30E-51  | 2.79E-49  | down | reverse transcriptase                       |
| 19889933 | BBA_06921 | -5.02 | 3.14E-122 | 4.36E-120 | down | tripeptidyl peptidase A                     |
| 19887385 | BBA_04373 | -4.98 | 8.78E-34  | 1.64E-32  | down | chalcone synthase B                         |
| 19888017 | BBA_05005 | -4.97 | 8.49E-61  | 3.36E-59  | down | hypothetical protein BBA_05005              |
| 19889600 | BBA_06588 | -4.93 | 1.66E-95  | 1.51E-93  | down | hypothetical protein BBA_06588              |
| 19885639 | BBA_02627 | -4.92 | 1.01E-66  | 4.54E-65  | down | hypothetical protein BBA_02627              |
| 19892621 | BBA_09609 | -4.88 | 1.68E-91  | 1.43E-89  | down | hypothetical protein BBA_09609              |
| 19886228 | BBA_03216 | -4.88 | 5.61E-95  | 4.99E-93  | down | helix-turn-helix domain-containing protein  |
| 19888186 | BBA_05174 | -4.83 | 3.44E-193 | 1.25E-190 | down | hypothetical protein BBA_05174              |
| 19883029 | BBA_00017 | -4.81 | 7.63E-45  | 1.97E-43  | down | ABC transporter                             |
| 19887956 | BBA_04944 | -4.76 | 8.30E-138 | 1.54E-135 | down | phytoene synthase/lycopene cyclase          |
| 19892311 | BBA_09299 | -4.75 | 2.01E-60  | 7.77E-59  | down | sarcosine oxidase                           |
| 19886458 | BBA_03446 | -4.70 | 4.53E-27  | 6.77E-26  | down | MFS transporter                             |
| 19891488 | BBA_08476 | -4.69 | 1.33E-208 | 6.31E-206 | down | serine carboxypeptidase S28                 |
| 19887667 | BBA_04655 | -4.65 | 1.85E-71  | 9.45E-70  | down | hypothetical protein BBA_04655              |
| 19893373 | BBA_10362 | -4.61 | 2.84E-32  | 5.08E-31  | down | PDZ domain-containing protein               |
| 19893334 | BBA_10322 | -4.53 | 2.48E-34  | 4.68E-33  | down | hypothetical protein BBA_10322              |
| 19884826 | BBA_01814 | -4.52 | 1.52E-156 | 3.49E-154 | down | oxidoreductase, 2OG-Fe(II) oxygenase family |
| 19883096 | BBA_00084 | -4.48 | 3.29E-50  | 9.67E-49  | down | Peptidase M64, IgA                          |
| 19891402 | BBA_08390 | -4.46 | 9.79E-124 | 1.40E-121 | down | hypothetical protein BBA_08390              |
| 19892309 | BBA_09297 | -4.46 | 3.24E-30  | 5.39E-29  | down | hypothetical protein BBA_09297              |
| 19886895 | BBA_03883 | -4.44 | 3.77E-176 | 1.08E-173 | down | phytase, putative                           |
| 19885641 | BBA_02629 | -4.42 | 4.13E-27  | 6.22E-26  | down | Putative conidiospore surface protein       |
| 19890302 | BBA_07290 | -4.41 | 2.98E-41  | 7.04E-40  | down | hypothetical protein BBA_07290              |
| 19884995 | BBA_01983 | -4.40 | 8.21E-202 | 3.37E-199 | down | hypothetical protein BBA_01983              |
| 19892787 | BBA_09775 | -4.39 | 7.08E-119 | 8.92E-117 | down | dimethylaniline monooxygenase               |
| 19889358 | BBA_06346 | -4.36 | 7.89E-144 | 1.59E-141 | down | oxaloacetate acetylhydrolase                |
| 19888185 | BBA_05173 | -4.35 | 1.19E-77  | 6.90E-76  | down | Cytochrome P450 CYP52G6                     |
| 19889368 | BBA_06356 | -4.34 | 3.08E-190 | 1.08E-187 | down | hypothetical protein BBA_06356              |
| 19888894 | BBA_05882 | -4.26 | 1.32E-138 | 2.50E-136 | down | hypothetical protein BBA_05882              |
| 19892234 | BBA_09222 | -4.20 | 1.94E-130 | 3.27E-128 | down | metallo-beta-lactamase superfamily protein  |
| 19886214 | BBA_03202 | -4.20 | 6.81E-124 | 1.00E-121 | down | phospholipase C PLC-C                       |
| 19892577 | BBA_09565 | -4.19 | 3.75E-53  | 1.21E-51  | down | hypothetical protein BBA_09565              |
| 19886807 | BBA_03795 | -4.15 | 3.02E-48  | 8.53E-47  | down | hypothetical protein BBA_03795              |
| 19890783 | BBA_07771 | -4.09 | 7.21E-71  | 3.62E-69  | down | feebly protein                              |
| 19890756 | BBA_07744 | -4.08 | 9.79E-73  | 5.14E-71  | down | FAD dependent oxidoreductase                |
| 19890043 | BBA_07031 | -4.07 | 4.10E-42  | 9.95E-41  | down | MFS multidrug transporter                   |
| 19890863 | BBA_07851 | -4.05 | 1.12E-23  | 1.46E-22  | down | hypothetical protein BBA_07851              |
| 19891909 | BBA_08897 | -4.02 | 8.67E-56  | 2.97E-54  | down | longiborneol synthase                       |
| 19890625 | BBA_07613 | -4.01 | 6.42E-95  | 5.67E-93  | down | Cytochrome P450 CYP684A2                    |
| 19889493 | BBA_06481 | -3.99 | 3.92E-132 | 6.73E-130 | down | hypothetical protein BBA_06481              |
| 19891073 | BBA_08061 | -3.99 | 5.72E-51  | 1.73E-49  | down | UPF0075 domain protein                      |
| 19890150 | BBA_07138 | -3.98 | 1.30E-95  | 1.20E-93  | down | conidial wall protein                       |
| 19888187 | BBA_05175 | -3.97 | 2.17E-126 | 3.31E-124 | down | LCCL domain-containing protein              |
| 19886864 | BBA_03852 | -3.94 | 2.70E-105 | 2.84E-103 | down | penicillin-binding protein                  |
| 19889428 | BBA_06416 | -3.91 | 6.21E-40  | 1.42E-38  | down | membrane transporter                        |
| 19884427 | BBA_01415 | -3.89 | 2.30E-70  | 1.15E-68  | down | hypothetical protein BBA_01415              |
| 19887401 | BBA_04389 | -3.89 | 1.94E-19  | 2.08E-18  | down | ATP synthase F1                             |
| 19890113 | BBA_07101 | -3.85 | 1.54E-81  | 9.82E-80  | down | hypothetical protein BBA_07101              |
| 19891383 | BBA_08371 | -3.84 | 3.78E-117 | 4.58E-115 | down | hypothetical protein BBA_08371              |
| 19892467 | BBA_09455 | -3.84 | 1.67E-45  | 4.36E-44  | down | hypothetical protein BBA_09455              |
| 19883804 | BBA_00792 | -3.80 | 1.18E-132 | 2.07E-130 | down | beta-1, 3 exoglucanase precursor            |
| 19890745 | BBA_07733 | -3.78 | 8.19E-85  | 5.77E-83  | down | Mating-type protein MAT1-1-1                |
| 19890897 | BBA_07885 | -3.78 | 3.88E-80  | 2.38E-78  | down | hypothetical protein BBA_07885              |
| 19893011 | BBA_09999 | -3.76 | 5.28E-65  | 2.26E-63  | down | hypothetical protein BBA_09999              |
| 19891259 | BBA_08247 | -3.75 | 4.67E-78  | 2.77E-76  | down | carboxypeptidase-like protein               |
| 19888365 | BBA_05353 | -3.75 | 1.48E-15  | 1.28E-14  | down | class III chitinase ChiA2                   |
| 19893022 | BBA_10010 | -3.74 | 7.17E-36  | 1.44E-34  | down | Cytochrome P450 CYP542B2                    |

|          |           |       |           |           |      |                                                      |
|----------|-----------|-------|-----------|-----------|------|------------------------------------------------------|
| 19893108 | BBA_10096 | -3.74 | 5.12E-45  | 1.33E-43  | down | metalloreductase transmembrane component             |
| 19883552 | BBA_00540 | -3.72 | 2.60E-85  | 1.85E-83  | down | MFS transporter, putative                            |
| 19885629 | BBA_02617 | -3.70 | 6.33E-39  | 1.41E-37  | down | Ankyrin repeat protein                               |
| 19886225 | BBA_03213 | -3.68 | 6.89E-54  | 2.25E-52  | down | putative aspartic protease                           |
| 19893322 | BBA_10310 | -3.67 | 6.24E-34  | 1.17E-32  | down | hypothetical protein BBA_10310                       |
| 19887386 | BBA_04374 | -3.65 | 1.21E-30  | 2.05E-29  | down | polyketide synthase, putative                        |
| 19889295 | BBA_06283 | -3.65 | 7.71E-70  | 3.77E-68  | down | hypothetical protein BBA_06283                       |
| 19883540 | BBA_00528 | -3.65 | 1.14E-142 | 2.24E-140 | down | short chain dehydrogenase                            |
| 19886718 | BBA_03706 | -3.64 | 2.47E-23  | 3.18E-22  | down | hypothetical protein BBA_03706                       |
| 19886489 | BBA_03477 | -3.63 | 4.06E-23  | 5.15E-22  | down | Cytochrome P450 CYP682H1                             |
| 19889720 | BBA_06708 | -3.62 | 2.59E-104 | 2.69E-102 | down | hypothetical protein BBA_06708                       |
| 19885130 | BBA_02118 | -3.59 | 1.90E-38  | 4.12E-37  | down | phosphatidylcholine-hydrolyzing phospholipase C      |
| 19889808 | BBA_06796 | -3.57 | 5.72E-42  | 1.39E-40  | down | hypothetical protein BBA_06796                       |
| 19885167 | BBA_02155 | -3.57 | 2.51E-115 | 2.93E-113 | down | Cytochrome P450 CYP6003A1                            |
| 19883017 | BBA_00005 | -3.55 | 3.65E-122 | 5.00E-120 | down | ABC transporter transmembrane region                 |
| 19892618 | BBA_09606 | -3.51 | 2.07E-15  | 1.78E-14  | down | hypothetical protein BBA_09606                       |
| 19893233 | BBA_10221 | -3.50 | 2.48E-56  | 8.57E-55  | down | hypothetical protein BBA_10221                       |
| 19885414 | BBA_02402 | -3.47 | 7.75E-22  | 9.29E-21  | down | hypothetical protein BBA_02402                       |
| 19892307 | BBA_09295 | -3.46 | 1.08E-63  | 4.51E-62  | down | glutathione-dependent formaldehyde-activating enzyme |
| 19883647 | BBA_00635 | -3.45 | 2.66E-10  | 1.58E-09  | down | Secretory lipase family protein                      |
| 19890757 | BBA_07745 | -3.45 | 1.09E-68  | 5.27E-67  | down | Glycoside hydrolase, catalytic core                  |
| 19885408 | BBA_02396 | -3.41 | 1.29E-137 | 2.34E-135 | down | NADPH-dependent FMN reductase                        |
| 19886826 | BBA_03814 | -3.41 | 1.12E-62  | 4.55E-61  | down | chitinase-like protein                               |
| 19890135 | BBA_07123 | -3.40 | 1.53E-23  | 1.98E-22  | down | hypothetical protein BBA_07123                       |
| 19891755 | BBA_08743 | -3.39 | 2.16E-127 | 3.34E-125 | down | sarcosine oxidase                                    |
| 19885603 | BBA_02591 | -3.39 | 2.04E-95  | 1.84E-93  | down | C6 zinc finger domain protein                        |
| 19889068 | BBA_06056 | -3.37 | 1.06E-116 | 1.27E-114 | down | allantoate permease                                  |
| 19892606 | BBA_09594 | -3.36 | 8.80E-28  | 1.35E-26  | down | putative peptidylarginine deiminase                  |
| 19888845 | BBA_05833 | -3.34 | 1.12E-51  | 3.43E-50  | down | major facilitator superfamily transporter            |
| 19887962 | BBA_04950 | -3.34 | 3.17E-63  | 1.30E-61  | down | nacht and ankyrin domain containing protein          |
| 19883628 | BBA_00616 | -3.34 | 3.04E-121 | 4.04E-119 | down | glycoside hydrolase family 35                        |
| 19883266 | BBA_00254 | -3.34 | 2.30E-34  | 4.35E-33  | down | hypothetical protein BBA_00254                       |
| 19887795 | BBA_04783 | -3.32 | 4.40E-29  | 6.99E-28  | down | UDP-N-acetylmuramate--L-alanine ligase               |
| 19886484 | BBA_03472 | -3.32 | 5.57E-77  | 3.17E-75  | down | Ankyrin repeat protein                               |
| 19885234 | BBA_02222 | -3.31 | 8.83E-39  | 1.96E-37  | down | F-box domain-containing protein                      |
| 19892473 | BBA_09461 | -3.29 | 8.26E-124 | 1.20E-121 | down | methyltransferase-like protein                       |
| 19892476 | BBA_09464 | -3.29 | 1.48E-65  | 6.48E-64  | down | hypothetical protein BBA_09464                       |
| 19892405 | BBA_09393 | -3.29 | 1.17E-54  | 3.90E-53  | down | sugar transport protein                              |
| 19892791 | BBA_09779 | -3.26 | 5.88E-30  | 9.67E-29  | down | hypothetical protein BBA_09779                       |
| 19886219 | BBA_03207 | -3.22 | 3.12E-82  | 2.05E-80  | down | amidase-like protein                                 |
| 19885957 | BBA_02945 | -3.21 | 3.88E-68  | 1.83E-66  | down | LysM domain-containing protein                       |
| 19886645 | BBA_03633 | -3.21 | 1.85E-24  | 2.52E-23  | down | hypothetical protein BBA_03633                       |
| 19888941 | BBA_05929 | -3.19 | 1.04E-113 | 1.18E-111 | down | WSC domain-containing protein                        |
| 19888565 | BBA_05553 | -3.19 | 1.33E-66  | 5.91E-65  | down | copper amine oxidase                                 |
| 19893363 | BBA_10351 | -3.18 | 1.14E-29  | 1.85E-28  | down | serine/threonine protein kinase Japonica Group       |
| 19892404 | BBA_09392 | -3.16 | 6.37E-89  | 5.14E-87  | down | Alkaline phosphatase-like protein                    |
| 19886560 | BBA_03548 | -3.16 | 3.95E-35  | 7.77E-34  | down | hypothetical protein BBA_03548                       |
| 19892720 | BBA_09708 | -3.14 | 7.16E-28  | 1.10E-26  | down | hypothetical protein BBA_09708                       |
| 19889721 | BBA_06709 | -3.13 | 4.31E-61  | 1.72E-59  | down | carboxylesterase-like protein                        |
| 19892564 | BBA_09552 | -3.13 | 1.43E-07  | 6.44E-07  | down | hypothetical protein BBA_09552                       |
| 19892344 | BBA_09332 | -3.10 | 9.67E-37  | 1.99E-35  | down | hypothetical protein BBA_09332                       |
| 19884196 | BBA_01184 | -3.10 | 2.62E-53  | 8.51E-52  | down | FAD binding domain protein                           |
| 19889754 | BBA_06742 | -3.09 | 2.53E-112 | 2.78E-110 | down | HET domain-containing protein                        |
| 19887283 | BBA_04271 | -3.08 | 3.36E-79  | 2.02E-77  | down | pheromone receptor                                   |
| 19886831 | BBA_03819 | -3.08 | 2.42E-87  | 1.87E-85  | down | l-lactate dehydrogenase                              |
| 19891516 | BBA_08504 | -3.07 | 1.66E-59  | 6.21E-58  | down | hypothetical protein BBA_08504                       |
| 19892905 | BBA_09893 | -3.06 | 1.47E-14  | 1.21E-13  | down | hypothetical protein BBA_09893                       |
| 19883537 | BBA_00525 | -3.03 | 1.14E-72  | 5.94E-71  | down | GPI anchored cell wall protein                       |
| 19891514 | BBA_08502 | -3.02 | 5.74E-87  | 4.34E-85  | down | hypothetical protein BBA_08502                       |
| 19887701 | BBA_04689 | -3.02 | 2.06E-24  | 2.78E-23  | down | hypothetical protein BBA_04689                       |
| 19889486 | BBA_06474 | -3.02 | 1.41E-44  | 3.62E-43  | down | cucumopine synthase                                  |

|          |           |       |           |           |      |                                               |
|----------|-----------|-------|-----------|-----------|------|-----------------------------------------------|
| 19885134 | BBA_02122 | -3.01 | 2.75E-71  | 1.39E-69  | down | hypothetical protein BBA_02122                |
| 19890801 | BBA_07789 | -3.01 | 6.12E-56  | 2.10E-54  | down | hypothetical protein BBA_07789                |
| 19891195 | BBA_08183 | -3.01 | 2.24E-54  | 7.40E-53  | down | laccase 2                                     |
| 19889340 | BBA_06328 | -2.99 | 1.59E-87  | 1.24E-85  | down | methyltransferase-like protein                |
| 19883805 | BBA_00793 | -2.99 | 7.37E-68  | 3.45E-66  | down | hypothetical protein BBA_00793                |
| 19893279 | BBA_10267 | -2.98 | 6.65E-77  | 3.76E-75  | down | amidohydrolase-like protein                   |
| 19889485 | BBA_06473 | -2.98 | 1.10E-93  | 9.50E-92  | down | Cytochrome P450 CYP684A2                      |
| 19885236 | BBA_02224 | -2.98 | 6.90E-70  | 3.40E-68  | down | hypothetical protein BBA_02224                |
| 19892538 | BBA_09526 | -2.98 | 2.63E-12  | 1.82E-11  | down | MFS transporter                               |
| 19892439 | BBA_09427 | -2.96 | 8.21E-103 | 8.42E-101 | down | serine carboxypeptidase                       |
| 19891432 | BBA_08420 | -2.94 | 1.48E-50  | 4.38E-49  | down | abhydrolase domain-containing protein         |
| 19892547 | BBA_09535 | -2.94 | 1.01E-50  | 3.02E-49  | down | fatty acid desaturase                         |
| 19888302 | BBA_05290 | -2.93 | 2.65E-46  | 7.01E-45  | down | fungus specific transcription factor          |
| 19886194 | BBA_03182 | -2.93 | 2.16E-08  | 1.07E-07  | down | hypothetical protein BBA_03182                |
| 19887098 | BBA_04086 | -2.91 | 1.65E-53  | 5.36E-52  | down | Zn2C6-type transcription factor               |
| 19885008 | BBA_01996 | -2.91 | 1.33E-70  | 6.67E-69  | down | GPI anchored protein, putative                |
| 19892937 | BBA_09925 | -2.91 | 6.93E-50  | 2.02E-48  | down | tetratricopeptide repeat domain protein       |
| 19890218 | BBA_07206 | -2.91 | 1.01E-90  | 8.39E-89  | down | hypothetical protein BBA_07206                |
| 19888563 | BBA_05551 | -2.90 | 4.31E-83  | 2.93E-81  | down | Beta-lactamase-type transpeptidase            |
| 19889394 | BBA_06382 | -2.89 | 4.49E-40  | 1.03E-38  | down | hypothetical protein BBA_06382                |
| 19887395 | BBA_04383 | -2.87 | 3.11E-89  | 2.55E-87  | down | Enoyl-CoA Hydratase family member             |
| 19885682 | BBA_02670 | -2.86 | 1.06E-46  | 2.85E-45  | down | hypothetical protein BBA_02670                |
| 19890755 | BBA_07743 | -2.86 | 1.70E-88  | 1.35E-86  | down | serine peptidase, putative                    |
| 19885168 | BBA_02156 | -2.85 | 7.76E-87  | 5.77E-85  | down | sporulation associated protein                |
| 19892585 | BBA_09573 | -2.85 | 2.00E-66  | 8.84E-65  | down | Cytochrome P450 CYP542B3                      |
| 19889752 | BBA_06740 | -2.85 | 2.40E-83  | 1.64E-81  | down | hypothetical protein BBA_06740                |
| 19892208 | BBA_09196 | -2.83 | 1.06E-41  | 2.55E-40  | down | hypothetical protein BBA_09196                |
| 19885245 | BBA_02233 | -2.82 | 7.67E-13  | 5.57E-12  | down | Glycoside hydrolase, catalytic core           |
| 19890098 | BBA_07086 | -2.82 | 6.77E-68  | 3.18E-66  | down | hypothetical protein BBA_07086                |
| 19892310 | BBA_09298 | -2.81 | 3.45E-48  | 9.66E-47  | down | Zn(II)2Cys6 transcription factor              |
| 19885463 | BBA_02451 | -2.80 | 2.88E-86  | 2.09E-84  | down | oligopeptide transporter                      |
| 19891185 | BBA_08173 | -2.79 | 5.64E-12  | 3.83E-11  | down | hypothetical protein BBA_08173                |
| 19891255 | BBA_08243 | -2.78 | 2.00E-77  | 1.15E-75  | down | calcineurin-like phosphoesterase              |
| 19891433 | BBA_08421 | -2.77 | 8.33E-04  | 2.08E-03  | down | volvatoxin A2 precursor                       |
| 19888664 | BBA_05652 | -2.77 | 7.59E-53  | 2.40E-51  | down | hypothetical protein BBA_05652                |
| 19891629 | BBA_08617 | -2.76 | 3.36E-34  | 6.30E-33  | down | hypothetical protein BBA_08617                |
| 19892738 | BBA_09726 | -2.76 | 4.42E-15  | 3.76E-14  | down | 2-dehydropantoate 2-reductase, putative       |
| 19890066 | BBA_07054 | -2.75 | 6.30E-59  | 2.32E-57  | down | C6 zinc finger domain-containing protein      |
| 19891447 | BBA_08435 | -2.74 | 7.15E-47  | 1.94E-45  | down | FAD binding domain-containing protein         |
| 19891715 | BBA_08703 | -2.73 | 2.14E-32  | 3.86E-31  | down | hypothetical protein BBA_08703                |
| 19887302 | BBA_04290 | -2.73 | 8.88E-51  | 2.67E-49  | down | hypothetical protein BBA_04290                |
| 19892474 | BBA_09462 | -2.72 | 6.06E-87  | 4.54E-85  | down | methyltransferase-like protein                |
| 19886448 | BBA_03436 | -2.71 | 2.71E-22  | 3.32E-21  | down | hypothetical protein BBA_03436                |
| 19890126 | BBA_07114 | -2.71 | 3.93E-87  | 3.02E-85  | down | aldo/keto reductase                           |
| 19887988 | BBA_04976 | -2.71 | 3.72E-68  | 1.78E-66  | down | enoyl-CoA hydratase/isomerase family protein  |
| 19886459 | BBA_03447 | -2.70 | 2.84E-34  | 5.36E-33  | down | extracellular protein                         |
| 19889487 | BBA_06475 | -2.70 | 2.30E-81  | 1.45E-79  | down | adenylate-forming enzyme AfeA                 |
| 19884130 | BBA_01118 | -2.68 | 3.30E-54  | 1.08E-52  | down | hypothetical protein BBA_01118                |
| 19892708 | BBA_09696 | -2.67 | 7.81E-69  | 3.78E-67  | down | tetratricopeptide repeat domain protein       |
| 19893182 | BBA_10170 | -2.67 | 2.98E-82  | 1.97E-80  | down | RNA interference and silencing protein (Qde2) |
| 19886774 | BBA_03762 | -2.67 | 4.18E-21  | 4.88E-20  | down | protein kinase subdomain-containing protein   |
| 19886292 | BBA_03280 | -2.67 | 1.41E-76  | 7.87E-75  | down | peroxin 11C                                   |
| 19885351 | BBA_02339 | -2.66 | 1.93E-38  | 4.17E-37  | down | taurine catabolism dioxygenase TauD           |
| 19893260 | BBA_10248 | -2.66 | 1.01E-13  | 7.83E-13  | down | aminotransferase class-III                    |
| 19890769 | BBA_07757 | -2.65 | 2.48E-18  | 2.50E-17  | down | maleylacetoacetate isomerase                  |
| 19888404 | BBA_05392 | -2.65 | 4.92E-67  | 2.26E-65  | down | O-methyltransferase-like protein              |
| 19885714 | BBA_02702 | -2.64 | 1.55E-49  | 4.49E-48  | down | salicylate hydroxylase                        |
| 19890142 | BBA_07130 | -2.63 | 1.32E-40  | 3.06E-39  | down | kinesin light chain 1 and                     |
| 19892298 | BBA_09286 | -2.63 | 4.81E-36  | 9.77E-35  | down | oxygenase-like protein                        |
| 19886921 | BBA_03909 | -2.62 | 8.70E-78  | 5.14E-76  | down | filamentous hemagglutinin / adhesin           |
| 19886320 | BBA_03308 | -2.62 | 1.16E-10  | 7.13E-10  | down | fatty acid hydroxylase superfamily protein    |

|          |           |       |          |          |      |                                                  |
|----------|-----------|-------|----------|----------|------|--------------------------------------------------|
| 19892375 | BBA_09363 | -2.62 | 4.97E-11 | 3.16E-10 | down | hypothetical protein BBA_09363                   |
| 19888721 | BBA_05709 | -2.61 | 8.15E-38 | 1.74E-36 | down | hypothetical protein BBA_05709                   |
| 19884930 | BBA_01918 | -2.61 | 4.97E-77 | 2.85E-75 | down |                                                  |
| 19886218 | BBA_03206 | -2.60 | 2.81E-52 | 8.63E-51 | down | acid phosphatase                                 |
| 19886234 | BBA_03222 | -2.60 | 1.48E-31 | 2.57E-30 | down | serine/threonine protein kinase                  |
| 19891478 | BBA_08466 | -2.60 | 5.17E-15 | 4.35E-14 | down | hypothetical protein BBA_08466                   |
| 19892778 | BBA_09766 | -2.58 | 5.54E-27 | 8.25E-26 | down | hypothetical protein BBA_09766                   |
| 19889770 | BBA_06758 | -2.58 | 1.78E-64 | 7.59E-63 | down | Na/K ATPase alpha 1 subunit, putative            |
| 19892855 | BBA_09843 | -2.57 | 2.49E-11 | 1.63E-10 | down | hypothetical protein BBA_09843                   |
| 19891232 | BBA_08220 | -2.57 | 2.12E-25 | 2.99E-24 | down | trichothecene 3-O-acetyltransferase              |
| 19883863 | BBA_00851 | -2.57 | 6.41E-24 | 8.43E-23 | down | small oligopeptide transporter, OPT family       |
| 19885300 | BBA_02288 | -2.56 | 3.31E-29 | 5.29E-28 | down | homeobox domain-containing protein               |
| 19890828 | BBA_07816 | -2.56 | 5.25E-75 | 2.87E-73 | down | major facilitator superfamily transporter        |
| 19885746 | BBA_02734 | -2.56 | 1.84E-73 | 9.73E-72 | down | formate dehydrogenase                            |
| 19887469 | BBA_04457 | -2.56 | 3.33E-79 | 2.01E-77 | down | hypothetical protein BBA_04457                   |
| 19893074 | BBA_10062 | -2.56 | 5.60E-29 | 8.86E-28 | down | hypothetical protein BBA_10062                   |
| 19893319 | BBA_10307 | -2.56 | 8.89E-12 | 5.97E-11 | down | hypothetical protein BBA_10307                   |
| 19885396 | BBA_02384 | -2.55 | 2.20E-79 | 1.34E-77 | down | Cytochrome P450 CYP542B3                         |
| 19889445 | BBA_06433 | -2.55 | 2.90E-80 | 1.80E-78 | down | hypothetical protein BBA_06433                   |
| 19887394 | BBA_04382 | -2.54 | 1.06E-74 | 5.71E-73 | down | xylitol dehydrogenase                            |
| 19892857 | BBA_09845 | -2.54 | 1.90E-12 | 1.34E-11 | down | hypothetical protein BBA_09845                   |
| 19885494 | BBA_02482 | -2.54 | 7.02E-55 | 2.37E-53 | down | carboxypeptidase Y                               |
| 19891072 | BBA_08060 | -2.54 | 6.12E-21 | 7.09E-20 | down | MFS monosaccharide transporter, putative         |
| 19889578 | BBA_06566 | -2.50 | 1.44E-06 | 5.72E-06 | down | ankyrin repeat protein                           |
| 19887627 | BBA_04615 | -2.49 | 2.01E-52 | 6.21E-51 | down | hypothetical protein BBA_04615                   |
| 19888461 | BBA_05449 | -2.48 | 1.33E-63 | 5.49E-62 | down | metabolite transport protein GIT1                |
| 19892580 | BBA_09568 | -2.47 | 8.57E-09 | 4.44E-08 | down | pol-like protein                                 |
| 19886835 | BBA_03823 | -2.47 | 2.61E-13 | 1.96E-12 | down | naphthalene 1,2-dioxygenase subunit alpha        |
| 19891658 | BBA_08646 | -2.46 | 4.88E-37 | 1.01E-35 | down | hypothetical protein BBA_08646                   |
| 19889590 | BBA_06578 | -2.46 | 3.74E-14 | 2.97E-13 | down | heterokaryon incompatibility protein             |
| 19889484 | BBA_06472 | -2.45 | 2.51E-43 | 6.29E-42 | down | Cytochrome P450 CYP5099A1                        |
| 19887096 | BBA_04084 | -2.45 | 5.16E-59 | 1.90E-57 | down | putative aspartic protease                       |
| 19885429 | BBA_02417 | -2.44 | 7.21E-48 | 2.01E-46 | down | secreted aspartic proteinase                     |
| 19889570 | BBA_06558 | -2.42 | 2.77E-16 | 2.49E-15 | down | ABC transporter, putative                        |
| 19889309 | BBA_06297 | -2.42 | 1.17E-38 | 2.57E-37 | down | chitinase-like protein                           |
| 19887220 | BBA_04208 | -2.42 | 3.35E-59 | 1.24E-57 | down | hypothetical protein BBA_04208                   |
| 19888101 | BBA_05089 | -2.41 | 5.85E-57 | 2.08E-55 | down | putative signal peptide-containing protein       |
| 19883871 | BBA_00859 | -2.41 | 5.78E-67 | 2.63E-65 | down | Putative Zn(II)2Cys6 transcription factor        |
| 19887675 | BBA_04663 | -2.40 | 3.16E-59 | 1.17E-57 | down | capsular associated protein                      |
| 19891746 | BBA_08734 | -2.40 | 8.96E-43 | 2.22E-41 | down | cyanide hydratase                                |
| 19892301 | BBA_09289 | -2.39 | 7.70E-53 | 2.43E-51 | down | Pectin lyase fold/virulence factor               |
| 19893117 | BBA_10105 | -2.39 | 1.43E-54 | 4.76E-53 | down | nonribosomal peptide synthase                    |
| 19893376 | BBA_10366 | -2.39 | 9.35E-24 | 1.22E-22 | down | PDZ domain-containing protein                    |
| 19892856 | BBA_09844 | -2.39 | 2.32E-15 | 1.99E-14 | down | vacuolar calcium ion transporter /H(+) exchanger |
| 19891253 | BBA_08241 | -2.39 | 3.14E-54 | 1.03E-52 | down | general alpha-glucoside permease                 |
| 19892319 | BBA_09307 | -2.39 | 5.71E-50 | 1.67E-48 | down | acidic chitinase                                 |
| 19887774 | BBA_04762 | -2.38 | 3.51E-30 | 5.82E-29 | down | hypothetical protein BBA_04762                   |
| 19888172 | BBA_05160 | -2.37 | 6.88E-69 | 3.35E-67 | down | glycolipid anchored surface protein              |
| 19884817 | BBA_01805 | -2.37 | 8.00E-25 | 1.11E-23 | down | MFS transporter                                  |
| 19891553 | BBA_08541 | -2.37 | 5.10E-28 | 7.88E-27 | down | short-chain dehydrogenase                        |
| 19883474 | BBA_00462 | -2.37 | 5.62E-53 | 1.81E-51 | down | APSES transcription factor Xbp1                  |
| 19886806 | BBA_03794 | -2.36 | 1.92E-06 | 7.44E-06 | down | hypothetical protein BBA_03794                   |
| 19885710 | BBA_02698 | -2.34 | 2.96E-66 | 1.30E-64 | down | Cytochrome P450 CYP5080B3                        |
| 19890006 | BBA_06994 | -2.34 | 1.63E-60 | 6.36E-59 | down | putative apoptosis-inducing factor (AIF)         |
| 19887174 | BBA_04162 | -2.33 | 2.91E-47 | 7.95E-46 | down | ZIP zinc/iron transporter                        |
| 19883925 | BBA_00913 | -2.33 | 1.73E-41 | 4.14E-40 | down | hypothetical protein BBA_00913                   |
| 19886839 | BBA_03827 | -2.33 | 6.99E-10 | 4.02E-09 | down | Riboflavin synthase-like beta-barrel             |
| 19885663 | BBA_02651 | -2.31 | 3.71E-64 | 1.57E-62 | down | LPXTG-domain-containing protein                  |
| 19892247 | BBA_09235 | -2.31 | 1.58E-55 | 5.39E-54 | down | putative dual specificity protein kinase pom1    |
| 19886844 | BBA_03832 | -2.31 | 6.58E-63 | 2.69E-61 | down | PAN domain containing protein                    |
| 19887999 | BBA_04987 | -2.29 | 8.65E-57 | 3.05E-55 | down | hypothetical protein BBA_04987                   |

|          |           |       |          |          |      |                                                        |
|----------|-----------|-------|----------|----------|------|--------------------------------------------------------|
| 19887421 | BBA_04409 | -2.28 | 4.10E-11 | 2.62E-10 | down | hypothetical protein BBA_04409                         |
| 19890347 | BBA_07335 | -2.27 | 1.51E-15 | 1.30E-14 | down | Cytochrome P450 CYP655C1                               |
| 19891193 | BBA_08181 | -2.27 | 1.46E-27 | 2.23E-26 | down | fungal specific transcription factor                   |
| 19888189 | BBA_05177 | -2.26 | 8.34E-39 | 1.85E-37 | down | enoyl reductase                                        |
| 19888373 | BBA_05361 | -2.26 | 7.05E-55 | 2.37E-53 | down | amidohydrolase-like protein                            |
| 19885541 | BBA_02529 | -2.26 | 3.31E-58 | 1.20E-56 | down | DNaseI protein                                         |
| 19887011 | BBA_03999 | -2.26 | 1.92E-32 | 3.47E-31 | down | hypothetical protein BBA_03999                         |
| 19891146 | BBA_08134 | -2.26 | 1.93E-10 | 1.16E-09 | down | hypothetical protein BBA_08134                         |
| 19886404 | BBA_03392 | -2.26 | 1.14E-59 | 4.29E-58 | down | membrane protein, putative                             |
| 19892797 | BBA_09785 | -2.26 | 1.83E-56 | 6.39E-55 | down | 3-hydroxybutyryl-CoA dehydratase                       |
| 19889756 | BBA_06744 | -2.25 | 5.11E-60 | 1.96E-58 | down | hypothetical protein BBA_06744                         |
| 19891513 | BBA_08501 | -2.25 | 8.46E-60 | 3.21E-58 | down | putative SAM-dependent methyltransferase               |
| 19886940 | BBA_03928 | -2.25 | 4.80E-31 | 8.18E-30 | down | hypothetical protein BBA_03928                         |
| 19883902 | BBA_00890 | -2.24 | 1.79E-20 | 2.02E-19 | down | Cytochrome P450 CYP5060A1                              |
| 19885009 | BBA_01997 | -2.24 | 3.45E-31 | 5.91E-30 | down | hypothetical protein BBA_01997                         |
| 19887938 | BBA_04926 | -2.24 | 1.43E-37 | 3.04E-36 | down | steroid monooxygenase                                  |
| 19890343 | BBA_07331 | -2.24 | 1.77E-57 | 6.37E-56 | down | N,O-diacetyl muramidase, putative                      |
| 19885107 | BBA_02095 | -2.24 | 7.85E-15 | 6.56E-14 | down | hypothetical protein BBA_02095                         |
| 19887462 | BBA_04450 | -2.23 | 1.63E-31 | 2.83E-30 | down | aspartic-type endopeptidase                            |
| 19888009 | BBA_04997 | -2.23 | 1.37E-39 | 3.10E-38 | down | hypothetical protein BBA_04997                         |
| 19890686 | BBA_07674 | -2.23 | 4.01E-49 | 1.16E-47 | down | Peptidase S33, tripeptidyl-peptidase                   |
| 19885347 | BBA_02335 | -2.22 | 8.17E-62 | 3.28E-60 | down | Cytochrome P450 CYP584E2                               |
| 19889729 | BBA_06717 | -2.22 | 2.93E-16 | 2.64E-15 | down | putative YFW family protein 5                          |
| 19886777 | BBA_03765 | -2.22 | 2.14E-16 | 1.94E-15 | down | thiamin biosynthesis protein (Thi-4)                   |
| 19887957 | BBA_04945 | -2.22 | 2.57E-32 | 4.62E-31 | down | phytoene dehydrogenase                                 |
| 19891915 | BBA_08903 | -2.22 | 6.55E-15 | 5.50E-14 | down | hypothetical protein BBA_08903                         |
| 19885468 | BBA_02456 | -2.21 | 1.03E-22 | 1.29E-21 | down | carotenoid ester lipase precursor                      |
| 19887702 | BBA_04690 | -2.21 | 8.71E-60 | 3.29E-58 | down | Na,H/K antiporter P-type ATPase                        |
| 19886233 | BBA_03221 | -2.21 | 2.08E-42 | 5.08E-41 | down | arginase-like protein                                  |
| 19892581 | BBA_09569 | -2.21 | 1.58E-14 | 1.30E-13 | down | hypothetical protein BBA_09569                         |
| 19884511 | BBA_01499 | -2.20 | 1.35E-48 | 3.86E-47 | down | nitrate assimilation regulatory protein nirA           |
| 19889316 | BBA_06304 | -2.20 | 9.24E-47 | 2.49E-45 | down | lipocalin-like domain-containing protein               |
| 19886841 | BBA_03829 | -2.20 | 1.18E-51 | 3.59E-50 | down | peptidase family M3                                    |
| 19885464 | BBA_02452 | -2.19 | 4.94E-48 | 1.38E-46 | down | ferulic acid esterase (FaeA), putative                 |
| 19886130 | BBA_03118 | -2.18 | 2.61E-37 | 5.50E-36 | down | von Willebrand factor type A domain-containing protein |
| 19892626 | BBA_09614 | -2.17 | 2.72E-41 | 6.45E-40 | down | hypothetical protein BBA_09614                         |
| 19888837 | BBA_05825 | -2.17 | 9.83E-27 | 1.45E-25 | down | secreted glucosidase                                   |
| 19883856 | BBA_00844 | -2.17 | 4.10E-46 | 1.08E-44 | down | fungal specific transcription factor                   |
| 19887237 | BBA_04225 | -2.17 | 6.26E-53 | 1.99E-51 | down | alpha-tubulin                                          |
| 19887670 | BBA_04658 | -2.16 | 1.90E-57 | 6.78E-56 | down | methyltransferase-like protein                         |
| 19888303 | BBA_05291 | -2.16 | 1.56E-15 | 1.35E-14 | down | thiol-specific monooxygenase                           |
| 19889753 | BBA_06741 | -2.16 | 1.50E-20 | 1.70E-19 | down | hypothetical protein BBA_06741                         |
| 19885845 | BBA_02833 | -2.16 | 2.96E-44 | 7.53E-43 | down | phosphoenolpyruvate carboxykinase                      |
| 19892165 | BBA_09153 | -2.15 | 3.78E-57 | 1.35E-55 | down | subtilisin-like serine protease PR1C                   |
| 19887839 | BBA_04827 | -2.15 | 4.40E-35 | 8.62E-34 | down | peptide synthetase                                     |
| 19883393 | BBA_00381 | -2.15 | 6.88E-42 | 1.66E-40 | down | pH-response regulator protein palF/RIM8                |
| 19887982 | BBA_04970 | -2.15 | 7.74E-58 | 2.79E-56 | down | dihydroxyacetone kinase                                |
| 19885777 | BBA_02765 | -2.15 | 1.08E-29 | 1.76E-28 | down | DJ-1/PfpI family protein                               |
| 19890571 | BBA_07559 | -2.14 | 1.13E-47 | 3.11E-46 | down | putative aspartate protease                            |
| 19888821 | BBA_05809 | -2.13 | 5.61E-27 | 8.33E-26 | down | MFS allantoate transporter, putative                   |
| 19892573 | BBA_09561 | -2.13 | 7.18E-28 | 1.11E-26 | down | F-box domain, Skp2                                     |
| 19887843 | BBA_04831 | -2.13 | 2.02E-16 | 1.84E-15 | down | hypothetical protein BBA_04831                         |
| 19892586 | BBA_09574 | -2.13 | 7.55E-30 | 1.24E-28 | down | hypothetical protein BBA_09574                         |
| 19887461 | BBA_04449 | -2.12 | 9.65E-25 | 1.33E-23 | down | helix-loop-helix DNA-binding domain-containing protein |
| 19888814 | BBA_05802 | -2.12 | 7.20E-53 | 2.28E-51 | down | ankyrin repeat protein                                 |
| 19889067 | BBA_06055 | -2.12 | 6.04E-32 | 1.07E-30 | down | dihydroflavonol-4-reductase protein                    |
| 19883676 | BBA_00664 | -2.12 | 7.02E-23 | 8.84E-22 | down |                                                        |
| 19892790 | BBA_09778 | -2.11 | 7.38E-32 | 1.29E-30 | down | hypothetical protein BBA_09778                         |
| 19887078 | BBA_04066 | -2.11 | 2.04E-29 | 3.28E-28 | down | PLC-like phosphodiesterase                             |
| 19893324 | BBA_10312 | -2.11 | 1.17E-22 | 1.46E-21 | down | hypothetical protein BBA_10312                         |
| 19883374 | BBA_00362 | -2.11 | 6.57E-39 | 1.46E-37 | down | hypothetical protein BBA_00362                         |

|          |           |       |          |          |      |                                                       |
|----------|-----------|-------|----------|----------|------|-------------------------------------------------------|
| 19890816 | BBA_07804 | -2.11 | 2.38E-03 | 5.38E-03 | down | putative salivary secreted peptide                    |
| 19889077 | BBA_06065 | -2.11 | 9.18E-09 | 4.75E-08 | down | hypothetical protein BBA_06065                        |
| 19891485 | BBA_08473 | -2.11 | 1.17E-17 | 1.14E-16 | down | siderophore iron transporter mirA                     |
| 19889755 | BBA_06743 | -2.11 | 1.22E-27 | 1.86E-26 | down | hypothetical protein BBA_06743                        |
| 19891386 | BBA_08374 | -2.10 | 5.35E-46 | 1.41E-44 | down | glyoxalase-like protein                               |
| 19887990 | BBA_04978 | -2.10 | 9.11E-39 | 2.01E-37 | down | tripeptidyl peptidase precursor                       |
| 19889583 | BBA_06571 | -2.10 | 2.51E-44 | 6.40E-43 | down | acyl-CoA dehydrogenase domain-containing protein      |
| 19889132 | BBA_06120 | -2.10 | 2.04E-44 | 5.23E-43 | down | C2H2 type zinc finger domain protein                  |
| 19893021 | BBA_10009 | -2.10 | 3.68E-19 | 3.88E-18 | down | 6-hydroxy-D-nicotine oxidase                          |
| 19886979 | BBA_03967 | -2.10 | 2.65E-19 | 2.81E-18 | down | hypothetical protein BBA_03967                        |
| 19889684 | BBA_06672 | -2.09 | 2.54E-12 | 1.76E-11 | down | hypothetical protein BBA_06672                        |
| 19886678 | BBA_03666 | -2.08 | 4.68E-18 | 4.64E-17 | down | ABC bile acid transporter, putative                   |
| 19886129 | BBA_03117 | -2.08 | 3.88E-22 | 4.71E-21 | down | Acyl-CoA N-acyltransferase                            |
| 19883071 | BBA_00059 | -2.08 | 9.58E-18 | 9.37E-17 | down | FAD binding domain containing protein                 |
| 19889093 | BBA_06081 | -2.08 | 2.69E-39 | 6.07E-38 | down | allantoate permease                                   |
| 19883601 | BBA_00589 | -2.08 | 3.64E-36 | 7.41E-35 | down | pyruvate dehydrogenase                                |
| 19883534 | BBA_00522 | -2.08 | 3.12E-30 | 5.20E-29 | down | Urease, alpha subunit                                 |
| 19889233 | BBA_06221 | -2.06 | 9.71E-35 | 1.88E-33 | down | putative HFM1/MER3 protein                            |
| 19884393 | BBA_01381 | -2.06 | 1.32E-08 | 6.74E-08 | down | hypothetical protein BBA_01381                        |
| 19891729 | BBA_08717 | -2.06 | 1.03E-16 | 9.57E-16 | down | hypothetical protein BBA_08717                        |
| 19886969 | BBA_03957 | -2.05 | 8.40E-48 | 2.33E-46 | down | integral membrane protein                             |
| 19892616 | BBA_09604 | -2.05 | 5.75E-04 | 1.48E-03 | down | synaptobrevin-like protein                            |
| 19885069 | BBA_02057 | -2.04 | 3.18E-20 | 3.55E-19 | down | heat shock protein 30                                 |
| 19883432 | BBA_00420 | -2.04 | 1.93E-31 | 3.34E-30 | down | hypothetical protein BBA_00420                        |
| 19886630 | BBA_03618 | -2.03 | 4.76E-21 | 5.55E-20 | down | hypothetical protein BBA_03618                        |
| 19890314 | BBA_07302 | -2.03 | 3.26E-22 | 3.98E-21 | down | GMP synthase                                          |
| 19892440 | BBA_09428 | -2.03 | 9.17E-10 | 5.21E-09 | down | peptidase family M3                                   |
| 19883926 | BBA_00914 | -2.02 | 3.63E-41 | 8.51E-40 | down | SMP-30/Gluconolactonase/LRE-like region               |
| 19886530 | BBA_03518 | -2.02 | 1.76E-20 | 1.99E-19 | down | major facilitator superfamily transporter             |
| 19887981 | BBA_04969 | -2.01 | 6.37E-29 | 1.00E-27 | down | ribose 5-phosphate isomerase                          |
| 19887650 | BBA_04638 | -2.01 | 5.27E-15 | 4.43E-14 | down | flavohemoglobin-like protein                          |
| 19885406 | BBA_02394 | -2.01 | 1.97E-19 | 2.10E-18 | down | methyltransferase-like protein                        |
| 19891642 | BBA_08630 | -2.01 | 8.19E-30 | 1.34E-28 | down | kinesin family protein                                |
| 19890400 | BBA_07388 | -2.01 | 1.62E-46 | 4.31E-45 | down | Glycoside hydrolase, catalytic core                   |
| 19892485 | BBA_09473 | -2.00 | 1.57E-25 | 2.22E-24 | down | dethiobiotin synthetase                               |
| 19892908 | BBA_09896 | -2.00 | 7.55E-25 | 1.05E-23 | down | Pfs, NACHT, and Ankyrin domain protein                |
| 19886837 | BBA_03825 | -2.00 | 1.81E-42 | 4.44E-41 | down | Cytochrome P450 CYP6001C8                             |
| 19891816 | BBA_08804 | -2.00 | 2.74E-11 | 1.79E-10 | down | hypothetical protein BBA_08804                        |
| 19888773 | BBA_05761 | -2.00 | 1.73E-47 | 4.76E-46 | down | phosphate permease                                    |
| 19888615 | BBA_05603 | -1.99 | 3.03E-48 | 8.55E-47 | down | Catalase-like domain, heme-dependent                  |
| 19892789 | BBA_09777 | -1.99 | 6.56E-10 | 3.79E-09 | down | hypothetical protein BBA_09777                        |
| 19892934 | BBA_09922 | -1.97 | 1.66E-42 | 4.08E-41 | down | hypothetical protein BBA_09922                        |
| 19890515 | BBA_07503 | -1.97 | 1.69E-35 | 3.36E-34 | down | 2-C-methyl-D-erythritol 2,4-cyclodiphosphate synthase |
| 19885656 | BBA_02644 | -1.97 | 9.36E-35 | 1.82E-33 | down | Ncp1-like protein                                     |
| 19888824 | BBA_05812 | -1.97 | 3.11E-41 | 7.33E-40 | down | hexose transporter                                    |
| 19889757 | BBA_06745 | -1.97 | 2.95E-33 | 5.42E-32 | down | putative peroxisomal membrane protein                 |
| 19892783 | BBA_09771 | -1.96 | 1.95E-37 | 4.11E-36 | down | FAD dependent oxidoreductase                          |
| 19883717 | BBA_00705 | -1.96 | 3.66E-16 | 3.27E-15 | down | hypothetical protein BBA_00705                        |
| 19891049 | BBA_08037 | -1.96 | 3.27E-12 | 2.25E-11 | down | putative RhoGEF group protein                         |
| 19886838 | BBA_03826 | -1.95 | 2.38E-48 | 6.78E-47 | down | sporulation associated protein                        |
| 19892906 | BBA_09894 | -1.94 | 1.30E-17 | 1.26E-16 | down | hypothetical protein BBA_09894                        |
| 19888643 | BBA_05631 | -1.94 | 1.54E-34 | 2.93E-33 | down | glucosamine-6-phosphate isomerase                     |
| 19884669 | BBA_01657 | -1.93 | 8.67E-47 | 2.34E-45 | down | prolyl oligopeptidase                                 |
| 19892697 | BBA_09685 | -1.93 | 3.51E-04 | 9.39E-04 | down | metalloprotease-like protein                          |
| 19883669 | BBA_00657 | -1.93 | 2.75E-24 | 3.68E-23 | down | purine-cytosine permease FCY21                        |
| 19885394 | BBA_02382 | -1.92 | 7.38E-35 | 1.44E-33 | down | Cytochrome P450 CYP52T1                               |
| 19887605 | BBA_04593 | -1.92 | 3.55E-17 | 3.36E-16 | down | hypothetical protein BBA_04593                        |
| 19885042 | BBA_02030 | -1.92 | 1.12E-42 | 2.77E-41 | down | aldehyde dehydrogenase                                |
| 19885165 | BBA_02153 | -1.91 | 5.09E-21 | 5.92E-20 | down | putative endochitinase CHI3                           |
| 19892472 | BBA_09460 | -1.91 | 1.87E-20 | 2.11E-19 | down | SAM dependent carboxyl methyltransferase              |
| 19885197 | BBA_02185 | -1.91 | 6.32E-24 | 8.32E-23 | down | phosphatidylserine decarboxylase-like protein         |

|          |           |       |          |          |      |                                                      |
|----------|-----------|-------|----------|----------|------|------------------------------------------------------|
| 19891269 | BBA_08257 | -1.90 | 1.13E-05 | 3.87E-05 | down | choline transport protein                            |
| 19885140 | BBA_02128 | -1.90 | 5.62E-08 | 2.65E-07 | down | Glycoside hydrolase, family 31                       |
| 19892460 | BBA_09448 | -1.90 | 4.75E-13 | 3.50E-12 | down | hypothetical protein BBA_09448                       |
| 19892174 | BBA_09162 | -1.89 | 3.27E-32 | 5.82E-31 | down | LipA and NB-ARC domain protein                       |
| 19891925 | BBA_08913 | -1.89 | 2.09E-29 | 3.36E-28 | down | hypothetical protein BBA_08913                       |
| 19893175 | BBA_10163 | -1.88 | 5.90E-25 | 8.23E-24 | down | hypothetical protein BBA_10163                       |
| 19892930 | BBA_09918 | -1.88 | 1.76E-24 | 2.40E-23 | down | protein kinase domain-containing protein             |
| 19883787 | BBA_00775 | -1.88 | 4.82E-43 | 1.20E-41 | down | glutamate/Leucine/Phenylalanine/Valine dehydrogenase |
| 19887417 | BBA_04405 | -1.88 | 8.34E-31 | 1.42E-29 | down | LEA domain protein                                   |
| 19887874 | BBA_04862 | -1.88 | 2.31E-30 | 3.87E-29 | down | HET domain protein                                   |
| 19888723 | BBA_05711 | -1.88 | 9.03E-33 | 1.64E-31 | down | CFEM domain-containing protein                       |
| 19891777 | BBA_08765 | -1.88 | 4.47E-05 | 1.39E-04 | down | tyrosinase-like protein                              |
| 19883244 | BBA_00232 | -1.87 | 7.49E-16 | 6.60E-15 | down | hypothetical protein BBA_00232                       |
| 19884113 | BBA_01101 | -1.87 | 8.17E-11 | 5.09E-10 | down | C6 zinc finger domain-containing protein             |
| 19889365 | BBA_06353 | -1.87 | 4.01E-12 | 2.75E-11 | down | Cytochrome P450 CYP660A2                             |
| 19887113 | BBA_04101 | -1.87 | 1.26E-22 | 1.56E-21 | down | 3'5'-cyclic nucleotide phosphodiesterase             |
| 19886150 | BBA_03138 | -1.87 | 5.31E-16 | 4.71E-15 | down | LysM domain-containing protein                       |
| 19892936 | BBA_09924 | -1.86 | 3.53E-11 | 2.27E-10 | down | zinc finger protein                                  |
| 19893292 | BBA_10280 | -1.86 | 3.20E-14 | 2.56E-13 | down | DnaJ domain containing protein                       |
| 19888732 | BBA_05720 | -1.86 | 1.63E-14 | 1.34E-13 | down |                                                      |
| 19888591 | BBA_05579 | -1.86 | 3.56E-40 | 8.20E-39 | down | UPF0311 protein                                      |
| 19889234 | BBA_06222 | -1.86 | 1.41E-02 | 2.69E-02 | down | protealysin-like protein                             |
| 19889647 | BBA_06635 | -1.86 | 2.19E-06 | 8.40E-06 | down | hypothetical protein BBA_06635                       |
| 19888372 | BBA_05360 | -1.86 | 8.26E-38 | 1.76E-36 | down | tyrosine phosphatase                                 |
| 19883582 | BBA_00570 | -1.86 | 1.39E-16 | 1.28E-15 | down | retrograde regulation protein                        |
| 19889217 | BBA_06205 | -1.85 | 4.99E-36 | 1.01E-34 | down | ankyrin repeat protein                               |
| 19885719 | BBA_02707 | -1.85 | 1.34E-06 | 5.32E-06 | down | hypothetical protein BBA_02707                       |
| 19883357 | BBA_00345 | -1.85 | 5.96E-14 | 4.66E-13 | down | iron-sulfur cluster-binding protein                  |
| 19893287 | BBA_10275 | -1.85 | 2.08E-06 | 7.99E-06 | down | hypothetical protein BBA_10275                       |
| 19889931 | BBA_06919 | -1.84 | 7.86E-37 | 1.62E-35 | down | SH3 domain-containing protein                        |
| 19893181 | BBA_10169 | -1.84 | 1.37E-22 | 1.70E-21 | down | ATPase protein                                       |
| 19888609 | BBA_05597 | -1.83 | 5.05E-18 | 4.99E-17 | down | RBP protein                                          |
| 19886582 | BBA_03570 | -1.83 | 1.04E-17 | 1.01E-16 | down | hypothetical protein BBA_03570                       |
| 19893239 | BBA_10227 | -1.83 | 2.20E-05 | 7.17E-05 | down | hypothetical protein BBA_10227                       |
| 19891476 | BBA_08464 | -1.83 | 4.86E-08 | 2.31E-07 | down | serine proteinase-like protein                       |
| 19885194 | BBA_02182 | -1.83 | 9.54E-42 | 2.29E-40 | down | cholinesterase-like protein                          |
| 19891756 | BBA_08744 | -1.83 | 7.83E-29 | 1.23E-27 | down | aspartokinase-like protein                           |
| 19885420 | BBA_02408 | -1.83 | 3.31E-21 | 3.89E-20 | down | Ankyrin repeat protein                               |
| 19885819 | BBA_02807 | -1.82 | 1.11E-40 | 2.58E-39 | down | hypothetical protein BBA_02807                       |
| 19886450 | BBA_03438 | -1.82 | 2.16E-36 | 4.43E-35 | down | Acyl-CoA N-acyltransferase                           |
| 19891306 | BBA_08294 | -1.82 | 1.27E-27 | 1.93E-26 | down | hypothetical protein BBA_08294                       |
| 19885667 | BBA_02655 | -1.82 | 1.19E-12 | 8.49E-12 | down | carbon-nitrogen hydrolase                            |
| 19889392 | BBA_06380 | -1.82 | 2.04E-25 | 2.89E-24 | down | glucanase B                                          |
| 19892693 | BBA_09681 | -1.82 | 1.58E-38 | 3.44E-37 | down | sarcosine oxidase                                    |
| 19891821 | BBA_08809 | -1.81 | 3.53E-29 | 5.63E-28 | down | carboxypeptidase Y                                   |
| 19883780 | BBA_00768 | -1.81 | 1.93E-37 | 4.09E-36 | down | major facilitator superfamily transporter            |
| 19887253 | BBA_04241 | -1.80 | 2.93E-32 | 5.22E-31 | down | phosphoesterase-like protein                         |
| 19884827 | BBA_01815 | -1.80 | 2.55E-12 | 1.77E-11 | down | hypothetical protein BBA_01815                       |
| 19885948 | BBA_02936 | -1.79 | 1.80E-17 | 1.73E-16 | down | peptidase family protein                             |
| 19886213 | BBA_03201 | -1.79 | 9.78E-14 | 7.57E-13 | down | aminotransferase class-V                             |
| 19885954 | BBA_02942 | -1.79 | 3.21E-11 | 2.07E-10 | down | LysM domain containing protein                       |
| 19888259 | BBA_05247 | -1.79 | 6.43E-26 | 9.22E-25 | down | hypothetical protein BBA_05247                       |
| 19883946 | BBA_00934 | -1.79 | 2.06E-24 | 2.78E-23 | down | sterigmatocystin 8-O-methyltransferase               |
| 19888252 | BBA_05240 | -1.79 | 2.40E-39 | 5.43E-38 | down | BolA-like protein                                    |
| 19885797 | BBA_02785 | -1.79 | 3.94E-38 | 8.47E-37 | down | hypothetical protein BBA_02785                       |
| 19891910 | BBA_08898 | -1.78 | 1.62E-31 | 2.81E-30 | down | Peptidase cysteine/serine, trypsin                   |
| 19889924 | BBA_06912 | -1.78 | 5.12E-16 | 4.54E-15 | down | hypothetical protein BBA_06912                       |
| 19884438 | BBA_01426 | -1.78 | 3.21E-34 | 6.03E-33 | down | piwi domain-containing protein                       |
| 19887540 | BBA_04528 | -1.77 | 1.21E-04 | 3.51E-04 | down | geranylgeranyl pyrophosphate synthetase              |
| 19888235 | BBA_05223 | -1.77 | 1.29E-18 | 1.32E-17 | down | fungal specific transcription factor                 |
| 19888764 | BBA_05752 | -1.77 | 4.80E-32 | 8.48E-31 | down | hypothetical protein BBA_05752                       |

|          |           |       |          |          |      |                                                     |
|----------|-----------|-------|----------|----------|------|-----------------------------------------------------|
| 19889035 | BBA_06023 | -1.77 | 2.57E-10 | 1.53E-09 | down | hypothetical protein BBA_06023                      |
| 19885171 | BBA_02159 | -1.77 | 9.79E-30 | 1.59E-28 | down | homoserine O-acetyltransferase                      |
| 19891535 | BBA_08523 | -1.77 | 5.38E-14 | 4.21E-13 | down | fungal specific transcription factor domain protein |
| 19892847 | BBA_09835 | -1.76 | 4.10E-14 | 3.25E-13 | down | hypothetical protein BBA_09835                      |
| 19884667 | BBA_01655 | -1.76 | 2.62E-36 | 5.36E-35 | down | sulfate permease                                    |
| 19884739 | BBA_01727 | -1.75 | 3.38E-06 | 1.26E-05 | down | hypothetical protein BBA_01727                      |
| 19890996 | BBA_07984 | -1.75 | 8.31E-25 | 1.15E-23 | down | hypothetical protein BBA_07984                      |
| 19890148 | BBA_07136 | -1.75 | 2.41E-06 | 9.20E-06 | down | major facilitator superfamily transporter           |
| 19890798 | BBA_07786 | -1.75 | 1.05E-34 | 2.02E-33 | down | calcium-translocating P-type ATPase                 |
| 19884668 | BBA_01656 | -1.74 | 1.42E-08 | 7.22E-08 | down | amine oxidase                                       |
| 19886456 | BBA_03444 | -1.74 | 1.82E-34 | 3.46E-33 | down | POT family protein                                  |
| 19884540 | BBA_01528 | -1.74 | 8.49E-27 | 1.26E-25 | down | frequency clock protein                             |
| 19888853 | BBA_05841 | -1.74 | 1.56E-35 | 3.09E-34 | down | ABC transporter, putative                           |
| 19885579 | BBA_02567 | -1.74 | 3.27E-38 | 7.05E-37 | down | nitrogen assimilation transcription factor nirA     |
| 19884822 | BBA_01810 | -1.73 | 1.15E-23 | 1.49E-22 | down | nonribosomal peptide synthase                       |
| 19890472 | BBA_07460 | -1.73 | 3.11E-14 | 2.50E-13 | down | hypothetical protein BBA_07460                      |
| 19890729 | BBA_07717 | -1.73 | 1.02E-35 | 2.04E-34 | down | hypothetical protein BBA_07717                      |
| 19884436 | BBA_01424 | -1.73 | 7.65E-20 | 8.36E-19 | down | hypothetical protein BBA_01424                      |
| 19885888 | BBA_02876 | -1.73 | 2.63E-31 | 4.55E-30 | down | vivid PAS protein VVD                               |
| 19884539 | BBA_01527 | -1.72 | 9.86E-30 | 1.60E-28 | down | hypothetical protein BBA_01527                      |
| 19889065 | BBA_06053 | -1.72 | 1.47E-29 | 2.37E-28 | down | short-chain dehydrogenase/reductase                 |
| 19883553 | BBA_00541 | -1.72 | 2.49E-23 | 3.20E-22 | down | phosphatidylserine decarboxylase family protein     |
| 19884513 | BBA_01501 | -1.72 | 4.09E-20 | 4.54E-19 | down | major facilitator superfamily transporter           |
| 19888659 | BBA_05647 | -1.72 | 1.15E-22 | 1.44E-21 | down | NAD/FAD-binding protein                             |
| 19888386 | BBA_05374 | -1.72 | 3.34E-23 | 4.26E-22 | down | hypothetical protein BBA_05374                      |
| 19890473 | BBA_07461 | -1.72 | 8.74E-14 | 6.77E-13 | down | Peptidase S8/S53, subtilisin/kexin/sedolisin        |
| 19889226 | BBA_06214 | -1.72 | 3.25E-09 | 1.77E-08 | down | Cytochrome P450 CYP5293A1                           |
| 19891043 | BBA_08031 | -1.71 | 5.53E-27 | 8.25E-26 | down | hypothetical protein BBA_08031                      |
| 19892140 | BBA_09128 | -1.71 | 3.02E-25 | 4.24E-24 | down | Concanavalin A-like lectin/glucanase                |
| 19885738 | BBA_02726 | -1.71 | 1.96E-04 | 5.48E-04 | down | hypothetical protein BBA_02726                      |
| 19884679 | BBA_01667 | -1.71 | 4.78E-07 | 2.01E-06 | down | forkhead domain-containing protein                  |
| 19893252 | BBA_10240 | -1.70 | 1.26E-29 | 2.03E-28 | down | histidine acid phosphatase                          |
| 19887242 | BBA_04230 | -1.70 | 5.04E-33 | 9.20E-32 | down | oxidoreductase family protein                       |
| 19892630 | BBA_09618 | -1.70 | 1.22E-34 | 2.34E-33 | down | dynamain GTPase, putative                           |
| 19889003 | BBA_05991 | -1.70 | 7.99E-36 | 1.60E-34 | down | PH domain-containing protein                        |
| 19884405 | BBA_01393 | -1.70 | 6.60E-07 | 2.73E-06 | down | hypothetical protein BBA_01393                      |
| 19888647 | BBA_05635 | -1.69 | 4.35E-19 | 4.56E-18 | down | nitrite reductase                                   |
| 19890881 | BBA_07869 | -1.69 | 9.91E-23 | 1.24E-21 | down | nudix domain containing protein                     |
| 19892135 | BBA_09123 | -1.69 | 1.38E-10 | 8.40E-10 | down | multidrug resistance protein MDR, putative          |
| 19892194 | BBA_09182 | -1.69 | 1.18E-32 | 2.14E-31 | down | Glycoside hydrolase, family 36                      |
| 19883837 | BBA_00825 | -1.69 | 5.16E-37 | 1.07E-35 | down | Major Facilitator Superfamily protein               |
| 19888637 | BBA_05625 | -1.69 | 1.43E-19 | 1.54E-18 | down | metal ion transporter metal ion transporter         |
| 19885837 | BBA_02825 | -1.69 | 1.25E-10 | 7.65E-10 | down | proline transporter                                 |
| 19884142 | BBA_01130 | -1.69 | 2.21E-07 | 9.67E-07 | down | hypothetical protein BBA_01130                      |
| 19893180 | BBA_10168 | -1.69 | 2.28E-15 | 1.96E-14 | down | geranylgeranyl pyrophosphate synthetase             |
| 19892849 | BBA_09837 | -1.68 | 1.97E-05 | 6.49E-05 | down | TPR repeat protein                                  |
| 19884076 | BBA_01064 | -1.68 | 3.46E-07 | 1.48E-06 | down | hypothetical protein BBA_01064                      |
| 19885385 | BBA_02373 | -1.68 | 4.65E-09 | 2.49E-08 | down | major facilitator superfamily transporter           |
| 19885517 | BBA_02505 | -1.68 | 2.66E-26 | 3.89E-25 | down | homeobox domain-containing protein                  |
| 19887803 | BBA_04791 | -1.68 | 1.33E-12 | 9.44E-12 | down | hypothetical protein BBA_04791                      |
| 19893368 | BBA_10356 | -1.68 | 1.60E-16 | 1.47E-15 | down | reverse transcriptase                               |
| 19890942 | BBA_07930 | -1.68 | 1.13E-19 | 1.22E-18 | down | protein kinase subdomain-containing protein         |
| 19893088 | BBA_10076 | -1.67 | 2.22E-12 | 1.55E-11 | down | CAMK family protein kinase                          |
| 19893071 | BBA_10059 | -1.67 | 1.20E-17 | 1.17E-16 | down | p63 related protein                                 |
| 19890091 | BBA_07079 | -1.67 | 1.91E-33 | 3.53E-32 | down | hypothetical protein BBA_07079                      |
| 19887282 | BBA_04270 | -1.67 | 1.57E-10 | 9.54E-10 | down | hypothetical protein BBA_04270                      |
| 19884824 | BBA_01812 | -1.67 | 2.58E-33 | 4.76E-32 | down | HD domain-containing protein                        |
| 19888986 | BBA_05974 | -1.66 | 9.98E-09 | 5.13E-08 | down | hypothetical protein BBA_05974                      |
| 19885559 | BBA_02547 | -1.66 | 5.66E-31 | 9.64E-30 | down | hypothetical protein BBA_02547                      |
| 19886852 | BBA_03840 | -1.66 | 6.71E-35 | 1.31E-33 | down | hypothetical protein BBA_03840                      |
| 19890966 | BBA_07954 | -1.66 | 7.59E-25 | 1.05E-23 | down | ammonium permease MepC                              |

|          |           |       |          |          |      |                                                         |
|----------|-----------|-------|----------|----------|------|---------------------------------------------------------|
| 19891856 | BBA_08844 | -1.66 | 3.02E-03 | 6.70E-03 | down | eukaryotic aspartyl protease                            |
| 19887159 | BBA_04147 | -1.65 | 1.84E-16 | 1.68E-15 | down | F-box domain-containing protein                         |
| 19890120 | BBA_07108 | -1.65 | 1.79E-09 | 9.91E-09 | down | hypothetical protein BBA_07108                          |
| 19883615 | BBA_00603 | -1.65 | 4.05E-18 | 4.03E-17 | down | AMP-binding enzyme                                      |
| 19892907 | BBA_09895 | -1.65 | 2.51E-24 | 3.38E-23 | down | hypothetical protein BBA_09895                          |
| 19893064 | BBA_10052 | -1.64 | 2.80E-06 | 1.06E-05 | down | hypothetical protein BBA_10052                          |
| 19890554 | BBA_07542 | -1.63 | 2.41E-21 | 2.83E-20 | down | hypothetical protein BBA_07542                          |
| 19884602 | BBA_01590 | -1.63 | 2.21E-14 | 1.80E-13 | down |                                                         |
| 19885108 | BBA_02096 | -1.63 | 3.24E-31 | 5.59E-30 | down | hypothetical protein BBA_02096                          |
| 19889164 | BBA_06152 | -1.63 | 3.25E-28 | 5.06E-27 | down | RTA1 like protein                                       |
| 19887672 | BBA_04660 | -1.63 | 1.13E-16 | 1.04E-15 | down | hypothetical protein BBA_04660                          |
| 19889279 | BBA_06267 | -1.62 | 1.08E-10 | 6.66E-10 | down | flavin-binding monooxygenase, putative                  |
| 19892175 | BBA_09163 | -1.62 | 7.97E-33 | 1.45E-31 | down | carbohydrate-binding module family 21                   |
| 19885218 | BBA_02206 | -1.62 | 1.32E-33 | 2.45E-32 | down | carboxypeptidase S1                                     |
| 19889439 | BBA_06427 | -1.62 | 4.13E-30 | 6.82E-29 | down | glycoside hydrolase family 13                           |
| 19885241 | BBA_02229 | -1.61 | 9.14E-33 | 1.66E-31 | down | hypothetical protein BBA_02229                          |
| 19884141 | BBA_01129 | -1.61 | 3.97E-32 | 7.03E-31 | down | inversin protein alternative isoform                    |
| 19884161 | BBA_01149 | -1.61 | 2.23E-22 | 2.74E-21 | down | alpha-1,3-mannosyltransferase CMT1                      |
| 19891931 | BBA_08919 | -1.61 | 1.59E-28 | 2.49E-27 | down | NRPS-like enzyme                                        |
| 19891725 | BBA_08713 | -1.61 | 1.28E-09 | 7.21E-09 | down | hypothetical protein BBA_08713                          |
| 19889544 | BBA_06532 | -1.60 | 2.88E-10 | 1.71E-09 | down | DUF500 domain protein                                   |
| 19889094 | BBA_06082 | -1.60 | 3.36E-30 | 5.58E-29 | down | ATP synthase F0                                         |
| 19892846 | BBA_09834 | -1.60 | 2.53E-05 | 8.17E-05 | down | hypothetical protein BBA_09834                          |
| 19883251 | BBA_00239 | -1.60 | 1.21E-14 | 1.00E-13 | down | transcription factor Domain protein family              |
| 19885329 | BBA_02317 | -1.60 | 7.79E-21 | 8.98E-20 | down | serine/threonine-protein kinase nak1                    |
| 19883396 | BBA_00384 | -1.60 | 8.04E-17 | 7.48E-16 | down | hypothetical protein BBA_00384                          |
| 19884823 | BBA_01811 | -1.60 | 7.36E-18 | 7.25E-17 | down | NAD dependent epimerase/dehydratase                     |
| 19886083 | BBA_03071 | -1.60 | 9.58E-04 | 2.36E-03 | down | hydrophobin-like protein                                |
| 19887940 | BBA_04928 | -1.60 | 1.48E-10 | 8.99E-10 | down | hypothetical protein BBA_04928                          |
| 19884676 | BBA_01664 | -1.60 | 1.05E-29 | 1.71E-28 | down | DNA photolyase                                          |
| 19884922 | BBA_01910 | -1.59 | 6.50E-24 | 8.54E-23 | down | hypothetical protein BBA_01910                          |
| 19885338 | BBA_02326 | -1.59 | 2.32E-09 | 1.28E-08 | down | sodium symporter family protein                         |
| 19888641 | BBA_05629 | -1.58 | 1.00E-28 | 1.57E-27 | down | carbohydrate esterase family 9                          |
| 19888378 | BBA_05366 | -1.58 | 4.81E-06 | 1.75E-05 | down | hypothetical protein BBA_05366                          |
| 19889351 | BBA_06339 | -1.58 | 9.21E-19 | 9.48E-18 | down | major facilitator superfamily transporter               |
| 19885240 | BBA_02228 | -1.58 | 4.90E-20 | 5.40E-19 | down | hypothetical protein BBA_02228                          |
| 19892134 | BBA_09122 | -1.58 | 6.15E-05 | 1.87E-04 | down | hypothetical protein BBA_09122                          |
| 19887074 | BBA_04062 | -1.58 | 2.02E-30 | 3.39E-29 | down | FAD binding domain-containing protein                   |
| 19891540 | BBA_08528 | -1.57 | 3.48E-08 | 1.68E-07 | down | hypothetical protein BBA_08528                          |
| 19887352 | BBA_04340 | -1.57 | 4.08E-10 | 2.39E-09 | down | hypothetical protein BBA_04340                          |
| 19883317 | BBA_00305 | -1.57 | 3.54E-26 | 5.14E-25 | down | Cytochrome P450 CYP628A2                                |
| 19883107 | BBA_00095 | -1.57 | 2.23E-29 | 3.57E-28 | down |                                                         |
| 19884131 | BBA_01119 | -1.57 | 1.15E-09 | 6.49E-09 | down | Di-trans-poly-cis-decaprenylcistransferase-like protein |
| 19889661 | BBA_06649 | -1.57 | 4.51E-27 | 6.75E-26 | down | hypothetical protein BBA_06649                          |
| 19886689 | BBA_03677 | -1.57 | 3.44E-12 | 2.37E-11 | down | hypothetical protein BBA_03677                          |
| 19886101 | BBA_03089 | -1.56 | 3.45E-07 | 1.48E-06 | down | tetratricopeptide repeat domain protein                 |
| 19890903 | BBA_07891 | -1.56 | 9.61E-22 | 1.15E-20 | down | bZIP transcription factor                               |
| 19891640 | BBA_08628 | -1.56 | 7.78E-11 | 4.87E-10 | down | Hsp70 family chaperone                                  |
| 19892348 | BBA_09336 | -1.56 | 1.02E-07 | 4.65E-07 | down | MFS quinate transporter, putative                       |
| 19892293 | BBA_09281 | -1.56 | 9.79E-10 | 5.56E-09 | down | hypothetical protein BBA_09281                          |
| 19885734 | BBA_02722 | -1.55 | 1.18E-21 | 1.40E-20 | down | nitrate assimilation regulatory protein nirA            |
| 19891095 | BBA_08083 | -1.55 | 3.76E-13 | 2.79E-12 | down | helix-loop-helix DNA-binding domain-containing protein  |
| 19883578 | BBA_00566 | -1.55 | 2.08E-03 | 4.75E-03 | down | hypothetical protein BBA_00566                          |
| 19890624 | BBA_07612 | -1.55 | 2.96E-30 | 4.94E-29 | down | FAD binding domain-containing protein                   |
| 19891044 | BBA_08032 | -1.55 | 2.91E-07 | 1.25E-06 | down | phosphotransferase enzyme family protein                |
| 19886243 | BBA_03231 | -1.55 | 1.08E-13 | 8.32E-13 | down | chorismate synthase                                     |
| 19887955 | BBA_04943 | -1.55 | 3.18E-05 | 1.01E-04 | down | putative carotenoid oxygenase                           |
| 19887568 | BBA_04556 | -1.55 | 1.98E-18 | 2.01E-17 | down | RTA1 like protein                                       |
| 19892044 | BBA_09032 | -1.55 | 2.16E-05 | 7.07E-05 | down | hypothetical protein BBA_09032                          |
| 19883611 | BBA_00599 | -1.54 | 1.82E-19 | 1.96E-18 | down |                                                         |
| 19889449 | BBA_06437 | -1.54 | 5.98E-25 | 8.32E-24 | down | Glycoside hydrolase, catalytic core                     |

|          |           |       |          |          |      |                                                         |
|----------|-----------|-------|----------|----------|------|---------------------------------------------------------|
| 19889838 | BBA_06826 | -1.54 | 4.80E-08 | 2.28E-07 | down | glucose oxidase precursor                               |
| 19885668 | BBA_02656 | -1.54 | 1.24E-24 | 1.69E-23 | down | LPXTG-domain-containing protein                         |
| 19892268 | BBA_09256 | -1.54 | 4.36E-14 | 3.44E-13 | down | prephenate dehydratase                                  |
| 19885596 | BBA_02584 | -1.54 | 1.68E-30 | 2.83E-29 | down | oxidoreductase family protein                           |
| 19884143 | BBA_01131 | -1.54 | 3.74E-20 | 4.15E-19 | down | hypothetical protein BBA_01131                          |
| 19885553 | BBA_02541 | -1.54 | 3.22E-26 | 4.70E-25 | down | dihydroxyacetone kinase                                 |
| 19885373 | BBA_02361 | -1.54 | 7.83E-22 | 9.37E-21 | down | FMN-binding split barrel-related protein                |
| 19893184 | BBA_10172 | -1.53 | 9.50E-09 | 4.90E-08 | down | hypothetical protein BBA_10172                          |
| 19883598 | BBA_00586 | -1.53 | 5.48E-27 | 8.19E-26 | down | DNA polymerase POL4, putative                           |
| 19890386 | BBA_07374 | -1.53 | 9.13E-08 | 4.19E-07 | down | hypothetical protein BBA_07374                          |
| 19887334 | BBA_04322 | -1.53 | 2.74E-20 | 3.06E-19 | down | transcription factor                                    |
| 19883525 | BBA_00513 | -1.53 | 2.69E-08 | 1.32E-07 | down | hypothetical protein BBA_00513                          |
| 19887876 | BBA_04864 | -1.52 | 8.77E-28 | 1.35E-26 | down | WD domain-containing protein                            |
| 19892563 | BBA_09551 | -1.52 | 8.78E-13 | 6.33E-12 | down | C6 transcription factor, putative                       |
| 19883768 | BBA_00756 | -1.52 | 4.34E-22 | 5.26E-21 | down | cAMP-independent regulatory protein pac2                |
| 19887097 | BBA_04085 | -1.52 | 5.79E-07 | 2.41E-06 | down | hypothetical protein BBA_04085                          |
| 19886840 | BBA_03828 | -1.52 | 5.53E-05 | 1.70E-04 | down | Cytochrome P450 CYP540B16                               |
| 19884760 | BBA_01748 | -1.52 | 2.71E-23 | 3.47E-22 | down | NADPH dehydrogenase                                     |
| 19887952 | BBA_04940 | -1.52 | 4.65E-05 | 1.45E-04 | down | RNase H domain containing protein                       |
| 19883087 | BBA_00075 | -1.52 | 5.05E-10 | 2.94E-09 | down | hypothetical protein BBA_00075                          |
| 19893068 | BBA_10056 | -1.52 | 6.91E-27 | 1.02E-25 | down | Amino acid/polyamine transporter I                      |
| 19884193 | BBA_01181 | -1.52 | 1.34E-06 | 5.34E-06 | down | heterokaryon incompatibility protein                    |
| 19888089 | BBA_05077 | -1.51 | 7.17E-12 | 4.85E-11 | down | hypothetical protein BBA_05077                          |
| 19892845 | BBA_09833 | -1.51 | 9.39E-06 | 3.28E-05 | down | hypothetical protein BBA_09833                          |
| 19889873 | BBA_06861 | -1.51 | 8.31E-09 | 4.32E-08 | down | inner membrane transport protein yfaV                   |
| 19891662 | BBA_08650 | -1.51 | 6.50E-20 | 7.11E-19 | down | hypothetical protein BBA_08650                          |
| 19885711 | BBA_02699 | -1.51 | 6.11E-17 | 5.71E-16 | down | mitochondrial chaperone BCS1                            |
| 19889735 | BBA_06723 | -1.51 | 2.50E-12 | 1.74E-11 | down | hypothetical protein BBA_06723                          |
| 19887082 | BBA_04070 | -1.50 | 5.99E-13 | 4.38E-12 | down | calcium/calmodulin dependent protein kinase C, putative |
| 19892223 | BBA_09211 | -1.50 | 2.01E-05 | 6.60E-05 | down | exo-beta-1,3-glucanase, putative                        |
| 19892217 | BBA_09205 | -1.50 | 1.50E-12 | 1.06E-11 | down | reverse transcriptase                                   |
| 19884015 | BBA_01003 | -1.49 | 1.82E-12 | 1.28E-11 | down | subtilase-like protein                                  |
| 19889087 | BBA_06075 | -1.49 | 7.90E-18 | 7.76E-17 | down | hypothetical protein BBA_06075                          |
| 19893364 | BBA_10352 | -1.49 | 2.50E-14 | 2.02E-13 | down | protein kinase domain-containing protein                |
| 19890339 | BBA_07327 | -1.49 | 2.86E-14 | 2.30E-13 | down | putative MEI5 protein                                   |
| 19885628 | BBA_02616 | -1.49 | 2.74E-08 | 1.34E-07 | down | receptor-interacting serine/threonine-protein kinase    |
| 19892887 | BBA_09875 | -1.49 | 4.96E-03 | 1.05E-02 | down | O-methyltransferase, family 3                           |
| 19890941 | BBA_07929 | -1.49 | 2.19E-06 | 8.40E-06 | down | nucleosome binding protein                              |
| 19883455 | BBA_00443 | -1.48 | 7.52E-16 | 6.63E-15 | down | cuticle-degrading protease bassiasin I precursor        |
| 19891636 | BBA_08624 | -1.48 | 2.79E-20 | 3.12E-19 | down | ATP synthase F0                                         |
| 19892066 | BBA_09054 | -1.48 | 1.77E-23 | 2.29E-22 | down | putative MEI5 protein                                   |
| 19888285 | BBA_05273 | -1.48 | 8.77E-08 | 4.04E-07 | down | hypothetical protein BBA_05273                          |
| 19892131 | BBA_09119 | -1.48 | 1.03E-26 | 1.52E-25 | down | phosphoesterase-like protein                            |
| 19886490 | BBA_03478 | -1.47 | 3.76E-10 | 2.22E-09 | down | DUF829 domain protein (PaxU)                            |
| 19885921 | BBA_02909 | -1.47 | 5.51E-12 | 3.75E-11 | down | kelch repeat protein                                    |
| 19887099 | BBA_04087 | -1.47 | 1.17E-21 | 1.39E-20 | down | F5/8 type C domain protein                              |
| 19892721 | BBA_09709 | -1.47 | 2.28E-15 | 1.96E-14 | down | Hsp70 family chaperone, putative                        |
| 19892841 | BBA_09829 | -1.47 | 1.58E-04 | 4.48E-04 | down | hypothetical protein BBA_09829                          |
| 19890369 | BBA_07357 | -1.47 | 3.21E-16 | 2.87E-15 | down | TPR domain protein                                      |
| 19884871 | BBA_01859 | -1.46 | 4.43E-06 | 1.62E-05 | down | hypothetical protein BBA_01859                          |
| 19892688 | BBA_09676 | -1.46 | 4.29E-07 | 1.82E-06 | down | MFS allantoin transporter                               |
| 19886833 | BBA_03821 | -1.46 | 1.67E-13 | 1.27E-12 | down | N,N-dimethylglycine oxidase                             |
| 19890673 | BBA_07661 | -1.46 | 1.09E-24 | 1.49E-23 | down | potassium/sodium efflux P-type ATPase                   |
| 19889518 | BBA_06506 | -1.46 | 9.20E-21 | 1.05E-19 | down | carbohydrate esterase family 3                          |
| 19890492 | BBA_07480 | -1.46 | 4.59E-24 | 6.06E-23 | down | membrane copper amine oxidase                           |
| 19883956 | BBA_00944 | -1.46 | 2.28E-12 | 1.59E-11 | down | nitrite transporter                                     |
| 19890721 | BBA_07709 | -1.46 | 3.16E-14 | 2.53E-13 | down | transcription factor RfeG                               |
| 19883237 | BBA_00225 | -1.46 | 2.67E-06 | 1.01E-05 | down | hypothetical protein BBA_00225                          |
| 19887991 | BBA_04979 | -1.46 | 1.37E-09 | 7.71E-09 | down | hypothetical protein BBA_04979                          |
| 19887671 | BBA_04659 | -1.45 | 3.45E-17 | 3.26E-16 | down | monooxygenase-like protein                              |
| 19892548 | BBA_09536 | -1.45 | 2.57E-25 | 3.62E-24 | down | transposase-like protein                                |

|          |           |       |          |          |      |                                                         |
|----------|-----------|-------|----------|----------|------|---------------------------------------------------------|
| 19889070 | BBA_06058 | -1.45 | 1.67E-19 | 1.79E-18 | down | esterase-like protein                                   |
| 19885412 | BBA_02400 | -1.45 | 3.38E-26 | 4.92E-25 | down | amidase-like protein                                    |
| 19888194 | BBA_05182 | -1.45 | 1.64E-17 | 1.59E-16 | down | ATPase protein                                          |
| 19887342 | BBA_04330 | -1.45 | 2.49E-22 | 3.06E-21 | down | BZIP-type transcription factor                          |
| 19887939 | BBA_04927 | -1.45 | 1.42E-05 | 4.79E-05 | down | arylesterase/monooxygenase                              |
| 19885980 | BBA_02968 | -1.44 | 1.65E-11 | 1.09E-10 | down | regulator of G protein signaling                        |
| 19884409 | BBA_01397 | -1.44 | 3.26E-04 | 8.75E-04 | down | ABC multidrug transporter, putative                     |
| 19885597 | BBA_02585 | -1.44 | 2.59E-08 | 1.27E-07 | down | dihydrodipicolinate synthase                            |
| 19884665 | BBA_01653 | -1.44 | 3.35E-22 | 4.09E-21 | down | DUF1275 domain protein                                  |
| 19888061 | BBA_05049 | -1.44 | 5.54E-22 | 6.68E-21 | down | hypothetical protein BBA_05049                          |
| 19884666 | BBA_01654 | -1.44 | 2.07E-24 | 2.80E-23 | down | oxalate decarboxylase family bicupin                    |
| 19886750 | BBA_03738 | -1.44 | 6.65E-13 | 4.85E-12 | down | heterotrimeric G protein beta subunit                   |
| 19890390 | BBA_07378 | -1.44 | 4.41E-24 | 5.85E-23 | down | putative histidine kinase HHK3p                         |
| 19883195 | BBA_00183 | -1.44 | 5.58E-08 | 2.63E-07 | down | major facilitator superfamily transporter               |
| 19891312 | BBA_08300 | -1.44 | 9.36E-14 | 7.25E-13 | down | arylamine N-acetyltransferase 1                         |
| 19890318 | BBA_07306 | -1.44 | 2.58E-13 | 1.94E-12 | down | hypothetical protein BBA_07306                          |
| 19890680 | BBA_07668 | -1.44 | 6.74E-11 | 4.25E-10 | down | peptidase C14                                           |
| 19890434 | BBA_07422 | -1.43 | 1.89E-11 | 1.25E-10 | down | hypothetical protein BBA_07422                          |
| 19890784 | BBA_07772 | -1.43 | 5.51E-09 | 2.92E-08 | down | reverse transcriptase                                   |
| 19886880 | BBA_03868 | -1.43 | 1.94E-24 | 2.63E-23 | down | piwi domain-containing protein                          |
| 19887835 | BBA_04823 | -1.43 | 2.69E-17 | 2.56E-16 | down | hypothetical protein BBA_04823                          |
| 19893023 | BBA_10011 | -1.42 | 5.46E-19 | 5.69E-18 | down | DUF323 domain-containing protein                        |
| 19888179 | BBA_05167 | -1.42 | 5.89E-06 | 2.11E-05 | down | peptidase family M48                                    |
| 19888600 | BBA_05588 | -1.42 | 2.69E-19 | 2.85E-18 | down | MAP kinase kinase skh1/pek1                             |
| 19890701 | BBA_07689 | -1.42 | 9.48E-07 | 3.85E-06 | down | transposase-like protein                                |
| 19887878 | BBA_04866 | -1.42 | 2.85E-13 | 2.13E-12 | down | finger protein AZF1                                     |
| 19892931 | BBA_09919 | -1.42 | 1.41E-04 | 4.04E-04 | down | hypothetical protein BBA_09919                          |
| 19889396 | BBA_06384 | -1.41 | 8.53E-07 | 3.47E-06 | down | hypothetical protein BBA_06384                          |
| 19884404 | BBA_01392 | -1.41 | 3.89E-18 | 3.88E-17 | down | glycosyltransferase family 2                            |
| 19892852 | BBA_09840 | -1.41 | 1.51E-15 | 1.31E-14 | down | hypothetical protein BBA_09840                          |
| 19888832 | BBA_05820 | -1.41 | 1.33E-15 | 1.16E-14 | down | C6 transcription factor, putative                       |
| 19891254 | BBA_08242 | -1.41 | 3.70E-08 | 1.78E-07 | down | glycoside hydrolase family 43 protein                   |
| 19891368 | BBA_08356 | -1.41 | 3.64E-21 | 4.27E-20 | down | integral membrane protein (Pth11)                       |
| 19888267 | BBA_05255 | -1.41 | 6.61E-07 | 2.73E-06 | down | ankyrin repeat protein                                  |
| 19889909 | BBA_06897 | -1.40 | 1.79E-12 | 1.26E-11 | down | hypothetical protein BBA_06897                          |
| 19892471 | BBA_09459 | -1.40 | 1.98E-13 | 1.50E-12 | down | hypothetical protein BBA_09459                          |
| 19887807 | BBA_04795 | -1.40 | 4.01E-12 | 2.75E-11 | down | hypothetical protein BBA_04795                          |
| 19884242 | BBA_01230 | -1.39 | 2.59E-20 | 2.90E-19 | down | ZIP Zinc transporter                                    |
| 19884021 | BBA_01009 | -1.39 | 2.59E-11 | 1.69E-10 | down | amino acid permease                                     |
| 19889339 | BBA_06327 | -1.39 | 1.73E-03 | 4.03E-03 | down | methyltransferase-like protein                          |
| 19885193 | BBA_02181 | -1.38 | 9.19E-26 | 1.31E-24 | down | ornithine carbamoyltransferase                          |
| 19884140 | BBA_01128 | -1.38 | 9.70E-24 | 1.27E-22 | down | yippee family protein                                   |
| 19890157 | BBA_07145 | -1.38 | 1.16E-12 | 8.27E-12 | down | hypothetical protein BBA_07145                          |
| 19885772 | BBA_02760 | -1.38 | 2.94E-23 | 3.76E-22 | down | Beta-lactamase-type transpeptidase                      |
| 19883331 | BBA_00319 | -1.38 | 1.65E-10 | 1.00E-09 | down | Peptidase S8                                            |
| 19887643 | BBA_04631 | -1.38 | 1.05E-23 | 1.37E-22 | down | Cytochrome P450 CYP6004A2                               |
| 19890143 | BBA_07131 | -1.37 | 2.08E-06 | 8.00E-06 | down | C3HC4 type (RING finger) zinc finger containing protein |
| 19888134 | BBA_05122 | -1.37 | 3.65E-24 | 4.86E-23 | down | hypothetical protein BBA_05122                          |
| 19893333 | BBA_10321 | -1.37 | 3.15E-16 | 2.82E-15 | down | Dynamin family protein                                  |
| 19885759 | BBA_02747 | -1.37 | 2.56E-05 | 8.26E-05 | down | Cytochrome P450 CYP682N1                                |
| 19884861 | BBA_01849 | -1.37 | 7.17E-16 | 6.33E-15 | down | hydroxyproline-rich glycoprotein DZ-HRGP                |
| 19887970 | BBA_04958 | -1.37 | 7.45E-19 | 7.70E-18 | down | RadR putative transcriptional regulator                 |
| 19883054 | BBA_00042 | -1.37 | 2.61E-24 | 3.51E-23 | down | homoserine acetyltransferase family protein             |
| 19883304 | BBA_00292 | -1.37 | 5.77E-19 | 5.99E-18 | down | WD domain-containing protein                            |
| 19887772 | BBA_04760 | -1.36 | 7.25E-09 | 3.80E-08 | down | Putative Zn(II)2Cys6 transcription factor               |
| 19889168 | BBA_06156 | -1.36 | 2.30E-21 | 2.70E-20 | down | sulfate transporter                                     |
| 19884402 | BBA_01390 | -1.36 | 3.90E-14 | 3.09E-13 | down | hypothetical protein BBA_01390                          |
| 19892926 | BBA_09914 | -1.36 | 1.37E-09 | 7.73E-09 | down | dynamin GTPase                                          |
| 19885007 | BBA_01995 | -1.36 | 2.41E-23 | 3.10E-22 | down | methyltransferase-like protein                          |
| 19892239 | BBA_09227 | -1.36 | 7.71E-07 | 3.15E-06 | down | ferric reductase like transmembrane component           |
| 19887393 | BBA_04381 | -1.35 | 3.15E-22 | 3.84E-21 | down | hypothetical protein BBA_04381                          |

|          |           |       |          |          |      |                                                       |
|----------|-----------|-------|----------|----------|------|-------------------------------------------------------|
| 19883409 | BBA_00397 | -1.35 | 5.52E-23 | 6.97E-22 | down | hexose transporter                                    |
| 19891226 | BBA_08214 | -1.35 | 4.56E-12 | 3.11E-11 | down | cell wall glucanotransferase Mwg1                     |
| 19886908 | BBA_03896 | -1.35 | 3.40E-11 | 2.19E-10 | down | dsp1-1-like protein                                   |
| 19883212 | BBA_00200 | -1.35 | 9.84E-07 | 3.98E-06 | down | hypothetical protein BBA_00200                        |
| 19890732 | BBA_07720 | -1.35 | 5.32E-11 | 3.39E-10 | down | hypothetical protein BBA_07720                        |
| 19890704 | BBA_07692 | -1.35 | 7.02E-24 | 9.20E-23 | down | dimethylaniline monooxygenase 3                       |
| 19884028 | BBA_01016 | -1.35 | 8.16E-23 | 1.02E-21 | down | Ribonuclease/ribotoxin                                |
| 19890491 | BBA_07479 | -1.35 | 2.00E-21 | 2.37E-20 | down | putative peptidylarginine deiminase                   |
| 19887382 | BBA_04370 | -1.34 | 8.45E-18 | 8.30E-17 | down | Cytochrome P450 CYP584G1                              |
| 19892220 | BBA_09208 | -1.34 | 5.54E-06 | 2.00E-05 | down | dimethylaniline monooxygenase                         |
| 19892614 | BBA_09602 | -1.34 | 1.51E-06 | 5.95E-06 | down | hypothetical protein BBA_09602                        |
| 19887190 | BBA_04178 | -1.34 | 3.61E-13 | 2.68E-12 | down | cyclopropane-fatty-acyl-phospholipid synthase         |
| 19884825 | BBA_01813 | -1.34 | 1.79E-16 | 1.64E-15 | down | NADP(+) coupled glycerol dehydrogenase                |
| 19884348 | BBA_01336 | -1.33 | 1.30E-18 | 1.33E-17 | down | bicyclomycin resistance protein                       |
| 19888866 | BBA_05854 | -1.33 | 1.48E-16 | 1.36E-15 | down | putative phospholipase                                |
| 19886235 | BBA_03223 | -1.33 | 5.72E-11 | 3.63E-10 | down | capsular associated protein                           |
| 19884757 | BBA_01745 | -1.33 | 1.97E-05 | 6.48E-05 | down | hypothetical protein BBA_01745                        |
| 19886697 | BBA_03685 | -1.33 | 1.18E-21 | 1.40E-20 | down | tetratricopeptide repeat domain-containing protein    |
| 19892910 | BBA_09898 | -1.33 | 2.12E-08 | 1.05E-07 | down | FluG domain-containing protein                        |
| 19883980 | BBA_00968 | -1.33 | 5.47E-18 | 5.41E-17 | down | hypothetical protein BBA_00968                        |
| 19890601 | BBA_07589 | -1.33 | 4.73E-10 | 2.76E-09 | down | nonribosomal peptide synthase, putative               |
| 19887477 | BBA_04465 | -1.32 | 4.65E-04 | 1.21E-03 | down | hypothetical protein BBA_04465                        |
| 19883411 | BBA_00399 | -1.32 | 1.12E-11 | 7.49E-11 | down | guanine nucleotide exchange factor synembryn          |
| 19890676 | BBA_07664 | -1.32 | 5.06E-14 | 3.97E-13 | down | stearoyl-CoA desaturase                               |
| 19889082 | BBA_06070 | -1.32 | 2.00E-05 | 6.59E-05 | down | ABC multidrug transporter                             |
| 19892492 | BBA_09480 | -1.32 | 9.49E-08 | 4.35E-07 | down | hypothetical protein BBA_09480                        |
| 19892838 | BBA_09826 | -1.32 | 8.63E-05 | 2.56E-04 | down | hypothetical protein BBA_09826                        |
| 19886416 | BBA_03404 | -1.32 | 6.60E-07 | 2.73E-06 | down | MFS multidrug transporter                             |
| 19888193 | BBA_05181 | -1.32 | 3.46E-18 | 3.46E-17 | down | alpha/beta fold family hydrolase                      |
| 19892115 | BBA_09103 | -1.32 | 1.72E-05 | 5.71E-05 | down | glyoxalase-like protein                               |
| 19887186 | BBA_04174 | -1.31 | 1.86E-08 | 9.27E-08 | down | hypothetical protein BBA_04174                        |
| 19883870 | BBA_00858 | -1.31 | 1.20E-20 | 1.37E-19 | down | hypothetical protein BBA_00858                        |
| 19887346 | BBA_04334 | -1.31 | 2.84E-16 | 2.56E-15 | down | hypothetical protein BBA_04334                        |
| 19891674 | BBA_08662 | -1.31 | 5.81E-10 | 3.37E-09 | down | Cytochrome P450 CYP561D2P                             |
| 19885436 | BBA_02424 | -1.31 | 9.71E-15 | 8.08E-14 | down | DASH family cryptochrome                              |
| 19885226 | BBA_02214 | -1.30 | 3.16E-11 | 2.04E-10 | down | subtilase-like protein                                |
| 19886100 | BBA_03088 | -1.30 | 3.91E-11 | 2.50E-10 | down | Ankyrin repeat protein                                |
| 19890782 | BBA_07770 | -1.30 | 1.64E-03 | 3.84E-03 | down | hypothetical protein BBA_07770                        |
| 19889971 | BBA_06959 | -1.30 | 3.27E-06 | 1.23E-05 | down | canalicular multispecific organic anion transporter 1 |
| 19883513 | BBA_00501 | -1.30 | 2.09E-22 | 2.57E-21 | down | negative acting factor                                |
| 19889551 | BBA_06539 | -1.30 | 1.12E-11 | 7.48E-11 | down | TfdA family Taurine catabolism dioxygenase TauD       |
| 19885818 | BBA_02806 | -1.30 | 7.32E-22 | 8.81E-21 | down | splicing factor Spf30                                 |
| 19888789 | BBA_05777 | -1.30 | 1.85E-11 | 1.22E-10 | down | putative HRQ family protein 2                         |
| 19890413 | BBA_07401 | -1.29 | 1.28E-10 | 7.79E-10 | down | fungal specific transcription factor                  |
| 19883486 | BBA_00474 | -1.29 | 1.06E-08 | 5.42E-08 | down |                                                       |
| 19890083 | BBA_07071 | -1.29 | 1.43E-15 | 1.24E-14 | down | C6 zinc finger domain-containing protein              |
| 19892424 | BBA_09412 | -1.29 | 1.36E-19 | 1.47E-18 | down | transcription factor                                  |
| 19888079 | BBA_05067 | -1.29 | 1.55E-13 | 1.18E-12 | down | RNase3 domain-containing protein                      |
| 19889208 | BBA_06196 | -1.29 | 1.07E-07 | 4.87E-07 | down | monooxygenase, FAD-binding protein                    |
| 19892525 | BBA_09513 | -1.29 | 5.40E-08 | 2.55E-07 | down | hypothetical protein BBA_09513                        |
| 19891913 | BBA_08901 | -1.29 | 2.43E-15 | 2.08E-14 | down | Peptidase S8/S53, subtilisin/kexin/sedolisin          |
| 19886455 | BBA_03443 | -1.29 | 4.29E-06 | 1.58E-05 | down | ABC transporter                                       |
| 19886286 | BBA_03274 | -1.29 | 6.27E-19 | 6.51E-18 | down | hypothetical protein BBA_03274                        |
| 19884224 | BBA_01212 | -1.29 | 1.48E-19 | 1.59E-18 | down | sodium/calcium exchanger protein                      |
| 19888321 | BBA_05309 | -1.29 | 5.47E-06 | 1.97E-05 | down | phosphotransferase enzyme family protein              |
| 19889287 | BBA_06275 | -1.29 | 3.97E-20 | 4.41E-19 | down | general amino acid permease AGP2                      |
| 19891090 | BBA_08078 | -1.29 | 1.62E-21 | 1.92E-20 | down | hypothetical protein BBA_08078                        |
| 19885666 | BBA_02654 | -1.29 | 1.12E-09 | 6.33E-09 | down | carbon-nitrogen hydrolase                             |
| 19885242 | BBA_02230 | -1.29 | 2.22E-17 | 2.13E-16 | down | chitinase-like protein                                |
| 19890309 | BBA_07297 | -1.28 | 1.12E-13 | 8.62E-13 | down | oxidoreductase, short-chain dehydrogenase/reductase   |
| 19889359 | BBA_06347 | -1.28 | 4.65E-20 | 5.13E-19 | down | DUF1275 domain protein                                |

|          |           |       |          |          |      |                                                      |
|----------|-----------|-------|----------|----------|------|------------------------------------------------------|
| 19889505 | BBA_06493 | -1.28 | 1.83E-05 | 6.07E-05 | down | hypothetical protein BBA_06493                       |
| 19889606 | BBA_06594 | -1.28 | 4.11E-17 | 3.87E-16 | down | Ig domain protein group 2 domain protein             |
| 19893069 | BBA_10057 | -1.28 | 5.27E-17 | 4.95E-16 | down | Acyl-CoA N-acyltransferase                           |
| 19886431 | BBA_03419 | -1.28 | 4.94E-05 | 1.53E-04 | down | hypothetical protein BBA_03419                       |
| 19888974 | BBA_05962 | -1.28 | 2.40E-17 | 2.30E-16 | down | fungus specific transcription factor, putative       |
| 19885444 | BBA_02432 | -1.28 | 3.87E-15 | 3.29E-14 | down | triacylglycerol lipase                               |
| 19885574 | BBA_02562 | -1.27 | 7.43E-07 | 3.05E-06 | down | AdoMet-dependent methyltransferase, Putative         |
| 19888704 | BBA_05692 | -1.27 | 1.98E-14 | 1.61E-13 | down | hypothetical protein BBA_05692                       |
| 19887836 | BBA_04824 | -1.27 | 3.15E-12 | 2.17E-11 | down | ABC transporter with duplicated ATPase domains       |
| 19890162 | BBA_07150 | -1.27 | 6.41E-18 | 6.32E-17 | down | sedoheptulose-1,7-bisphosphatase                     |
| 19886779 | BBA_03767 | -1.27 | 9.02E-19 | 9.30E-18 | down | uricase-like protein                                 |
| 19887749 | BBA_04737 | -1.27 | 1.22E-09 | 6.90E-09 | down | heterokaryon incompatibility protein                 |
| 19883438 | BBA_00426 | -1.27 | 1.37E-17 | 1.33E-16 | down | phospholipase D2                                     |
| 19892617 | BBA_09605 | -1.27 | 7.71E-04 | 1.93E-03 | down | chitinase-like protein                               |
| 19893354 | BBA_10342 | -1.27 | 4.23E-08 | 2.02E-07 | down | hypothetical protein BBA_10342                       |
| 19893282 | BBA_10270 | -1.27 | 6.83E-15 | 5.71E-14 | down | restless-like transposase                            |
| 19889069 | BBA_06057 | -1.27 | 6.29E-21 | 7.27E-20 | down | Fungal transcriptional regulatory protein            |
| 19883179 | BBA_00167 | -1.27 | 4.91E-17 | 4.61E-16 | down | hemolysin-III family protein                         |
| 19888997 | BBA_05985 | -1.27 | 2.59E-20 | 2.90E-19 | down | nitrate assimilation regulatory protein nirA         |
| 19890010 | BBA_06998 | -1.27 | 5.06E-18 | 5.01E-17 | down | ATROPHIN-1 protein                                   |
| 19884107 | BBA_01095 | -1.27 | 3.18E-17 | 3.02E-16 | down | MAP kinase kinase 1                                  |
| 19886475 | BBA_03463 | -1.27 | 2.81E-18 | 2.83E-17 | down | acid phosphatase                                     |
| 19887910 | BBA_04898 | -1.27 | 2.70E-19 | 2.86E-18 | down |                                                      |
| 19885415 | BBA_02403 | -1.26 | 5.06E-21 | 5.89E-20 | down | glycosyl hydrolase, putative                         |
| 19887404 | BBA_04392 | -1.26 | 3.05E-14 | 2.45E-13 | down | lipase/thioesterase                                  |
| 19888125 | BBA_05113 | -1.26 | 1.51E-04 | 4.29E-04 | down | hypothetical protein BBA_05113                       |
| 19890037 | BBA_07025 | -1.26 | 1.35E-14 | 1.12E-13 | down | ATG1 protein                                         |
| 19885417 | BBA_02405 | -1.26 | 4.80E-09 | 2.57E-08 | down | RNA recognition domain-containing protein            |
| 19885209 | BBA_02197 | -1.26 | 1.79E-19 | 1.92E-18 | down | nucleoside-diphosphate-sugar epimerase               |
| 19886610 | BBA_03598 | -1.26 | 2.18E-09 | 1.20E-08 | down | RasGEF domain-containing protein                     |
| 19890956 | BBA_07944 | -1.26 | 1.49E-18 | 1.52E-17 | down | PAF acetylhydrolase                                  |
| 19890999 | BBA_07987 | -1.26 | 4.63E-14 | 3.64E-13 | down | hypothetical protein BBA_07987                       |
| 19889919 | BBA_06907 | -1.26 | 5.59E-20 | 6.14E-19 | down | histidine acid phosphatase                           |
| 19890551 | BBA_07539 | -1.26 | 1.76E-16 | 1.61E-15 | down | sugar hydrolase                                      |
| 19889294 | BBA_06282 | -1.26 | 9.98E-19 | 1.03E-17 | down | fungus specific transcription factor                 |
| 19890490 | BBA_07478 | -1.25 | 2.38E-19 | 2.53E-18 | down | Pfs domain protein                                   |
| 19892459 | BBA_09447 | -1.25 | 7.01E-12 | 4.74E-11 | down | hypothetical protein BBA_09447                       |
| 19893154 | BBA_10142 | -1.25 | 1.11E-17 | 1.08E-16 | down | small s protein                                      |
| 19883471 | BBA_00459 | -1.25 | 4.61E-20 | 5.09E-19 | down | hypothetical protein BBA_00459                       |
| 19889432 | BBA_06420 | -1.25 | 1.42E-19 | 1.54E-18 | down | oligopeptide transporter                             |
| 19889315 | BBA_06303 | -1.25 | 3.85E-18 | 3.85E-17 | down | methyltransferase domain-containing protein          |
| 19892364 | BBA_09352 | -1.25 | 3.41E-16 | 3.05E-15 | down | MFS allantoate transporter, putative                 |
| 19890866 | BBA_07854 | -1.25 | 7.04E-06 | 2.50E-05 | down | Pfs, NACHT, and Ankyrin domain protein               |
| 19889345 | BBA_06333 | -1.25 | 3.72E-06 | 1.38E-05 | down | phospholipase A2                                     |
| 19883088 | BBA_00076 | -1.25 | 1.63E-06 | 6.40E-06 | down | thiamin biosynthesis protein (Thi-4)                 |
| 19891320 | BBA_08308 | -1.25 | 4.75E-19 | 4.98E-18 | down | OPT oligopeptide transporter                         |
| 19892302 | BBA_09290 | -1.25 | 5.00E-06 | 1.82E-05 | down | CFEM domain-containing protein                       |
| 19883724 | BBA_00712 | -1.25 | 2.73E-12 | 1.88E-11 | down | putative C6-zinc finger TF, regulator of conidiation |
| 19886796 | BBA_03784 | -1.25 | 2.83E-13 | 2.12E-12 | down | alpha/beta hydrolase fold protein                    |
| 19885572 | BBA_02560 | -1.24 | 4.19E-05 | 1.31E-04 | down | dual specificity phosphatase Yvh1, putative          |
| 19889117 | BBA_06105 | -1.24 | 7.51E-06 | 2.65E-05 | down | hypothetical protein BBA_06105                       |
| 19886064 | BBA_03052 | -1.24 | 9.38E-15 | 7.81E-14 | down | peptidase family M20/M25/M40                         |
| 19885452 | BBA_02440 | -1.24 | 2.33E-13 | 1.76E-12 | down | peptidase M61 domain protein                         |
| 19883675 | BBA_00663 | -1.24 | 3.13E-11 | 2.03E-10 | down | beta-lactamase family protein                        |
| 19891618 | BBA_08606 | -1.24 | 7.95E-11 | 4.97E-10 | down | F-box protein                                        |
| 19888623 | BBA_05611 | -1.24 | 1.72E-17 | 1.65E-16 | down | copper-transporting ATPase                           |
| 19892497 | BBA_09485 | -1.24 | 1.36E-14 | 1.13E-13 | down |                                                      |
| 19887360 | BBA_04348 | -1.24 | 3.69E-14 | 2.95E-13 | down | wd-repeat protein                                    |
| 19884558 | BBA_01546 | -1.24 | 2.56E-04 | 7.02E-04 | down | hypothetical protein BBA_01546                       |
| 19891665 | BBA_08653 | -1.24 | 4.51E-06 | 1.65E-05 | down | hypothetical protein BBA_08653                       |
| 19891515 | BBA_08503 | -1.24 | 4.76E-11 | 3.04E-10 | down | hypothetical protein BBA_08503                       |

|          |           |       |          |          |      |                                                     |
|----------|-----------|-------|----------|----------|------|-----------------------------------------------------|
| 19888777 | BBA_05765 | -1.23 | 7.73E-16 | 6.81E-15 | down | HET domain protein                                  |
| 19888153 | BBA_05141 | -1.23 | 1.48E-06 | 5.85E-06 | down | putative NDT80 protein                              |
| 19892461 | BBA_09449 | -1.23 | 1.96E-13 | 1.49E-12 | down | hypothetical protein BBA_09449                      |
| 19888549 | BBA_05537 | -1.23 | 9.84E-16 | 8.63E-15 | down | polysaccharide synthase Cps1p                       |
| 19887111 | BBA_04099 | -1.23 | 3.66E-08 | 1.77E-07 | down | hypothetical protein BBA_04099                      |
| 19888000 | BBA_04988 | -1.23 | 1.95E-19 | 2.08E-18 | down | aminotransferase class I and II                     |
| 19884326 | BBA_01314 | -1.22 | 6.26E-09 | 3.30E-08 | down | peptide transporter MTD1                            |
| 19884942 | BBA_01930 | -1.22 | 3.75E-18 | 3.75E-17 | down | OPT peptide transporter Mtd1                        |
| 19889530 | BBA_06518 | -1.22 | 5.44E-10 | 3.17E-09 | down | DnaJ domain-containing protein                      |
| 19889574 | BBA_06562 | -1.22 | 7.09E-17 | 6.62E-16 | down | hypothetical protein BBA_06562                      |
| 19889769 | BBA_06757 | -1.22 | 4.15E-16 | 3.70E-15 | down | DUF895 domain membrane protein, putative            |
| 19889045 | BBA_06033 | -1.22 | 5.23E-19 | 5.46E-18 | down | LamB/YcsF family protein                            |
| 19884081 | BBA_01069 | -1.22 | 2.63E-16 | 2.38E-15 | down | fatty-acid amide hydrolase                          |
| 19890643 | BBA_07631 | -1.22 | 7.72E-19 | 7.98E-18 | down | family S53 protease                                 |
| 19886189 | BBA_03177 | -1.22 | 1.76E-05 | 5.84E-05 | down | fungal specific transcription factor                |
| 19891774 | BBA_08762 | -1.22 | 3.05E-14 | 2.45E-13 | down | autophagy related lipase                            |
| 19886206 | BBA_03194 | -1.22 | 4.10E-16 | 3.66E-15 | down | RasGEF domain-containing protein                    |
| 19890516 | BBA_07504 | -1.21 | 3.19E-08 | 1.55E-07 | down | hypothetical protein BBA_07504                      |
| 19891388 | BBA_08376 | -1.21 | 3.40E-19 | 3.59E-18 | down | MAC1 interacting protein                            |
| 19888838 | BBA_05826 | -1.21 | 2.26E-14 | 1.83E-13 | down | 20beta-hydroxysteroid dehydrogenase                 |
| 19887815 | BBA_04803 | -1.21 | 1.46E-10 | 8.84E-10 | down | F-box domain-containing protein                     |
| 19888246 | BBA_05234 | -1.21 | 7.59E-14 | 5.90E-13 | down | glycosyl hydrolase                                  |
| 19891632 | BBA_08620 | -1.21 | 1.87E-14 | 1.53E-13 | down | drug resistance protein                             |
| 19890416 | BBA_07404 | -1.21 | 6.36E-16 | 5.63E-15 | down | DUF221 family protein                               |
| 19892465 | BBA_09453 | -1.21 | 9.98E-05 | 2.93E-04 | down | hypothetical protein BBA_09453                      |
| 19885524 | BBA_02512 | -1.21 | 2.93E-06 | 1.11E-05 | down | putative ATP-dependent RNA helicase DED1            |
| 19884514 | BBA_01502 | -1.21 | 8.55E-13 | 6.18E-12 | down | fungal specific transcription factor                |
| 19888406 | BBA_05394 | -1.20 | 8.85E-15 | 7.38E-14 | down | C4-dicarboxylate transporter/malic acid transporter |
| 19883740 | BBA_00728 | -1.20 | 5.74E-19 | 5.97E-18 | down | zinc-binding dehydrogenase                          |
| 19886832 | BBA_03820 | -1.20 | 2.63E-19 | 2.79E-18 | down | sarcosine oxidase                                   |
| 19893261 | BBA_10249 | -1.20 | 1.83E-14 | 1.50E-13 | down | kynurenine 3-monooxygenase                          |
| 19883882 | BBA_00870 | -1.20 | 3.20E-04 | 8.59E-04 | down | permease-like protein                               |
| 19885362 | BBA_02350 | -1.20 | 1.49E-09 | 8.32E-09 | down | zinc finger protein 76 (expressed in testis)        |
| 19884838 | BBA_01826 | -1.20 | 2.96E-12 | 2.04E-11 | down | capsular associated protein                         |
| 19887810 | BBA_04798 | -1.20 | 5.56E-07 | 2.32E-06 | down | hypothetical protein BBA_04798                      |
| 19890547 | BBA_07535 | -1.20 | 2.33E-10 | 1.39E-09 | down | ankyrin repeat protein                              |
| 19883350 | BBA_00338 | -1.20 | 2.81E-17 | 2.67E-16 | down | L-arabinitol 4-dehydrogenase                        |
| 19891551 | BBA_08539 | -1.20 | 3.23E-04 | 8.69E-04 | down | putative SAM-dependent methyltransferase            |
| 19889076 | BBA_06064 | -1.20 | 2.35E-09 | 1.29E-08 | down | GATA zinc finger protein                            |
| 19884890 | BBA_01878 | -1.19 | 2.62E-14 | 2.11E-13 | down | hypothetical protein BBA_01878                      |
| 19888758 | BBA_05746 | -1.19 | 2.43E-14 | 1.97E-13 | down | FAD binding domain protein                          |
| 19886976 | BBA_03964 | -1.19 | 3.37E-14 | 2.70E-13 | down | Glycoside hydrolase, catalytic core                 |
| 19892266 | BBA_09254 | -1.19 | 1.26E-13 | 9.68E-13 | down | nitrate assimilation regulatory protein nirA        |
| 19888798 | BBA_05786 | -1.19 | 1.94E-07 | 8.59E-07 | down | protein kinase domain-containing protein            |
| 19886578 | BBA_03566 | -1.19 | 8.89E-19 | 9.18E-18 | down | transmembrane amino acid transporter                |
| 19888748 | BBA_05736 | -1.19 | 2.75E-05 | 8.86E-05 | down | MFS monosaccharide transporter (Hxt8)               |
| 19887674 | BBA_04662 | -1.19 | 1.27E-17 | 1.23E-16 | down | SAM-dependent methyltransferase                     |
| 19889276 | BBA_06264 | -1.19 | 2.59E-09 | 1.42E-08 | down | Brefeldin A-sensitivity protein 4                   |
| 19888044 | BBA_05032 | -1.19 | 5.48E-08 | 2.59E-07 | down | DUF967 domain-containing protein                    |
| 19891262 | BBA_08250 | -1.19 | 2.10E-16 | 1.91E-15 | down | methyltransferase-like protein                      |
| 19886428 | BBA_03416 | -1.18 | 2.39E-08 | 1.18E-07 | down | hypothetical protein BBA_03416                      |
| 19886626 | BBA_03614 | -1.18 | 2.24E-14 | 1.82E-13 | down | hypothetical protein BBA_03614                      |
| 19888224 | BBA_05212 | -1.18 | 7.43E-18 | 7.31E-17 | down | ATP synthase F0                                     |
| 19887037 | BBA_04025 | -1.18 | 2.37E-08 | 1.17E-07 | down | glucose oxidase                                     |
| 19884887 | BBA_01875 | -1.18 | 2.15E-18 | 2.18E-17 | down | arginase-like protein                               |
| 19891008 | BBA_07996 | -1.18 | 4.11E-18 | 4.09E-17 | down | hypothetical protein BBA_07996                      |
| 19884367 | BBA_01355 | -1.18 | 1.39E-12 | 9.83E-12 | down | hypothetical protein BBA_01355                      |
| 19889812 | BBA_06800 | -1.18 | 1.08E-12 | 7.73E-12 | down | beta-galactosidase                                  |
| 19888897 | BBA_05885 | -1.18 | 4.91E-15 | 4.14E-14 | down | FAD binding domain-containing protein               |
| 19889122 | BBA_06110 | -1.18 | 5.76E-11 | 3.65E-10 | down | pall protein                                        |
| 19885288 | BBA_02276 | -1.17 | 8.11E-09 | 4.22E-08 | down | tetratricopeptide repeat domain-containing protein  |

|          |           |       |          |          |      |                                                      |
|----------|-----------|-------|----------|----------|------|------------------------------------------------------|
| 19883684 | BBA_00672 | -1.17 | 7.97E-13 | 5.77E-12 | down | putative glutathione S-transferase                   |
| 19887980 | BBA_04968 | -1.17 | 2.63E-07 | 1.14E-06 | down | hypothetical protein BBA_04968                       |
| 19888973 | BBA_05961 | -1.17 | 1.52E-12 | 1.08E-11 | down | 3-hydroxyacid dehydrogenase/reductase                |
| 19893024 | BBA_10012 | -1.16 | 1.11E-03 | 2.71E-03 | down | FluG domain-containing protein                       |
| 19888398 | BBA_05386 | -1.16 | 3.96E-13 | 2.93E-12 | down | major facilitator superfamily transporter            |
| 19883581 | BBA_00569 | -1.16 | 3.82E-11 | 2.45E-10 | down | hypothetical protein BBA_00569                       |
| 19892805 | BBA_09793 | -1.16 | 1.47E-07 | 6.63E-07 | down | hypothetical protein BBA_09793                       |
| 19887920 | BBA_04908 | -1.16 | 4.11E-05 | 1.29E-04 | down | penicillin-binding protein                           |
| 19892358 | BBA_09346 | -1.16 | 1.80E-07 | 7.99E-07 | down | amidase-like protein                                 |
| 19884227 | BBA_01215 | -1.16 | 1.04E-05 | 3.61E-05 | down |                                                      |
| 19887972 | BBA_04960 | -1.15 | 2.77E-04 | 7.57E-04 | down | Methyltransferase type 11                            |
| 19885239 | BBA_02227 | -1.15 | 6.93E-13 | 5.05E-12 | down | hypothetical protein BBA_02227                       |
| 19886012 | BBA_03000 | -1.15 | 1.66E-04 | 4.68E-04 | down | isochorismatase-like protein                         |
| 19886935 | BBA_03923 | -1.15 | 6.13E-12 | 4.16E-11 | down | galactonate dehydratase                              |
| 19890001 | BBA_06989 | -1.15 | 8.67E-04 | 2.16E-03 | down | hypothetical protein BBA_06989                       |
| 19892166 | BBA_09154 | -1.15 | 5.43E-14 | 4.25E-13 | down | HET-s/LopB domain-containing protein                 |
| 19886628 | BBA_03616 | -1.15 | 6.74E-10 | 3.88E-09 | down | polyketide synthase, putative                        |
| 19888719 | BBA_05707 | -1.15 | 7.39E-08 | 3.43E-07 | down | UPF0665 family protein c                             |
| 19892258 | BBA_09246 | -1.15 | 4.30E-12 | 2.94E-11 | down | hypothetical protein BBA_09246                       |
| 19890949 | BBA_07937 | -1.15 | 1.10E-10 | 6.77E-10 | down | amino acid kinase                                    |
| 19888720 | BBA_05708 | -1.15 | 4.14E-06 | 1.53E-05 | down | putative carbohydrate-binding protein                |
| 19890763 | BBA_07751 | -1.15 | 2.51E-12 | 1.74E-11 | down | hypothetical protein BBA_07751                       |
| 19888605 | BBA_05593 | -1.15 | 6.02E-16 | 5.33E-15 | down | small s protein                                      |
| 19891975 | BBA_08963 | -1.15 | 1.83E-05 | 6.05E-05 | down | hypothetical protein BBA_08963                       |
| 19884879 | BBA_01867 | -1.14 | 1.49E-08 | 7.53E-08 | down | WD domain-containing protein                         |
| 19889573 | BBA_06561 | -1.14 | 1.09E-13 | 8.42E-13 | down | histone-lysine N-methyltransferase                   |
| 19888310 | BBA_05298 | -1.14 | 6.29E-08 | 2.94E-07 | down | DNA repair and transcription factor Ada, putative    |
| 19893329 | BBA_10317 | -1.14 | 1.32E-11 | 8.80E-11 | down | Ankyrin repeat protein                               |
| 19883575 | BBA_00563 | -1.14 | 8.28E-07 | 3.38E-06 | down | hypothetical protein BBA_00563                       |
| 19884453 | BBA_01441 | -1.14 | 2.35E-08 | 1.16E-07 | down | zinc finger protein SFP1                             |
| 19885660 | BBA_02648 | -1.14 | 6.57E-07 | 2.72E-06 | down | malic enzyme                                         |
| 19891996 | BBA_08984 | -1.14 | 1.94E-11 | 1.27E-10 | down | ankyrin repeat-containing protein                    |
| 19883802 | BBA_00790 | -1.14 | 5.74E-15 | 4.82E-14 | down | L-serine dehydratase                                 |
| 19893348 | BBA_10336 | -1.14 | 2.04E-11 | 1.34E-10 | down | hypothetical protein BBA_10336                       |
| 19888464 | BBA_05452 | -1.13 | 2.68E-08 | 1.32E-07 | down | T-complex protein 11                                 |
| 19883308 | BBA_00296 | -1.13 | 1.15E-10 | 7.07E-10 | down | RING-8 protein                                       |
| 19889935 | BBA_06923 | -1.13 | 2.06E-07 | 9.10E-07 | down | YhhN family protein                                  |
| 19892334 | BBA_09322 | -1.13 | 3.88E-05 | 1.23E-04 | down | chitin synthase                                      |
| 19883904 | BBA_00892 | -1.13 | 5.89E-08 | 2.76E-07 | down | hypothetical protein BBA_00892                       |
| 19890642 | BBA_07630 | -1.13 | 7.36E-04 | 1.85E-03 | down | Rieske domain-containing protein                     |
| 19889492 | BBA_06480 | -1.13 | 2.17E-11 | 1.42E-10 | down | oxidoreductase FAD-binding domain-containing protein |
| 19883907 | BBA_00895 | -1.13 | 1.46E-07 | 6.56E-07 | down | RasGEF domain-containing protein                     |
| 19885470 | BBA_02458 | -1.13 | 1.17E-15 | 1.02E-14 | down | hypothetical protein BBA_02458                       |
| 19886026 | BBA_03014 | -1.13 | 2.32E-10 | 1.39E-09 | down | bZIP transcription factor                            |
| 19888635 | BBA_05623 | -1.13 | 2.68E-06 | 1.02E-05 | down | zinc finger protein                                  |
| 19883117 | BBA_00105 | -1.13 | 2.15E-03 | 4.91E-03 | down | Putative Zn(II)2Cys6 transcription factor            |
| 19885080 | BBA_02068 | -1.12 | 1.84E-14 | 1.51E-13 | down | calcineurin-like phosphoesterase                     |
| 19883467 | BBA_00455 | -1.12 | 1.64E-12 | 1.16E-11 | down | MYND domain protein, putative                        |
| 19885607 | BBA_02595 | -1.12 | 3.13E-08 | 1.52E-07 | down | major facilitator superfamily transporter            |
| 19890911 | BBA_07899 | -1.12 | 3.27E-16 | 2.93E-15 | down | chitinase 18-3                                       |
| 19893089 | BBA_10077 | -1.12 | 1.81E-04 | 5.09E-04 | down | Dynamin family protein                               |
| 19888050 | BBA_05038 | -1.12 | 2.75E-04 | 7.51E-04 | down | hypothetical protein BBA_05038                       |
| 19891745 | BBA_08733 | -1.12 | 2.81E-07 | 1.21E-06 | down | allantoicase-like protein                            |
| 19885827 | BBA_02815 | -1.12 | 2.80E-09 | 1.53E-08 | down | ABC transporter                                      |
| 19885159 | BBA_02147 | -1.12 | 7.42E-14 | 5.78E-13 | down | radical SAM superfamily protein                      |
| 19889890 | BBA_06878 | -1.12 | 9.23E-15 | 7.69E-14 | down | DNA repair protein (Rad57), putative                 |
| 19888154 | BBA_05142 | -1.12 | 2.10E-09 | 1.16E-08 | down | tafazzin-like protein                                |
| 19891984 | BBA_08972 | -1.11 | 1.70E-06 | 6.64E-06 | down | hypothetical protein BBA_08972                       |
| 19883643 | BBA_00631 | -1.11 | 1.28E-06 | 5.12E-06 | down | D-alanine--D-alanine ligase                          |
| 19884098 | BBA_01086 | -1.11 | 1.64E-12 | 1.16E-11 | down | thymine dioxygenase                                  |
| 19888359 | BBA_05347 | -1.11 | 5.89E-11 | 3.73E-10 | down | Ncp1-like protein                                    |

|          |           |       |          |          |      |                                                     |
|----------|-----------|-------|----------|----------|------|-----------------------------------------------------|
| 19888051 | BBA_05039 | -1.11 | 5.05E-15 | 4.25E-14 | down | hypothetical protein BBA_05039                      |
| 19887330 | BBA_04318 | -1.11 | 1.48E-14 | 1.21E-13 | down | PH domain-containing protein                        |
| 19885490 | BBA_02478 | -1.11 | 3.35E-07 | 1.44E-06 | down | R3H domain-containing protein                       |
| 19884250 | BBA_01238 | -1.11 | 1.08E-13 | 8.32E-13 | down | hypothetical protein BBA_01238                      |
| 19889004 | BBA_05992 | -1.11 | 1.38E-07 | 6.21E-07 | down | NTF2 and RRM domain-containing protein              |
| 19886191 | BBA_03179 | -1.11 | 3.61E-11 | 2.32E-10 | down | calcium-transporting ATPase                         |
| 19889607 | BBA_06595 | -1.11 | 1.28E-03 | 3.07E-03 | down | hypothetical protein UCP014753                      |
| 19892090 | BBA_09078 | -1.11 | 1.90E-04 | 5.32E-04 | down | beta-hexosaminidase                                 |
| 19883235 | BBA_00223 | -1.11 | 3.03E-04 | 8.20E-04 | down | hypothetical protein BBA_00223                      |
| 19892843 | BBA_09831 | -1.11 | 9.52E-04 | 2.35E-03 | down | hypothetical protein BBA_09831                      |
| 19884431 | BBA_01419 | -1.11 | 1.41E-15 | 1.23E-14 | down | adenine phosphoribosyltransferase                   |
| 19887676 | BBA_04664 | -1.10 | 1.11E-11 | 7.44E-11 | down | pyridoxal-phosphate dependent enzyme                |
| 19883929 | BBA_00917 | -1.10 | 1.22E-13 | 9.41E-13 | down | hypothetical protein BBA_00917                      |
| 19887928 | BBA_04916 | -1.10 | 7.20E-14 | 5.61E-13 | down | aminotransferase class-III                          |
| 19885161 | BBA_02149 | -1.10 | 2.15E-08 | 1.06E-07 | down | phosphate metabolism protein                        |
| 19888403 | BBA_05391 | -1.10 | 2.95E-15 | 2.52E-14 | down | modin protein                                       |
| 19891858 | BBA_08846 | -1.10 | 6.36E-14 | 4.97E-13 | down | hypothetical protein BBA_08846                      |
| 19883433 | BBA_00421 | -1.10 | 2.66E-11 | 1.74E-10 | down | LAS seventeen-binding protein                       |
| 19884099 | BBA_01087 | -1.10 | 3.55E-15 | 3.03E-14 | down | amidohydrolase-like protein                         |
| 19890790 | BBA_07778 | -1.10 | 2.30E-13 | 1.73E-12 | down | oxidoreductase, 2OG-Fe(II) oxygenase family protein |
| 19888070 | BBA_05058 | -1.10 | 3.10E-09 | 1.69E-08 | down | acyltransferase-like protein                        |
| 19893185 | BBA_10173 | -1.10 | 5.79E-13 | 4.24E-12 | down | K-3-type glutaminase                                |
| 19889170 | BBA_06158 | -1.10 | 6.67E-10 | 3.85E-09 | down | fork head domain-containing protein                 |
| 19889391 | BBA_06379 | -1.10 | 5.86E-09 | 3.10E-08 | down | glycoside hydrolase family 16 protein               |
| 19885047 | BBA_02035 | -1.10 | 3.89E-10 | 2.29E-09 | down | hypothetical protein BBA_02035                      |
| 19889833 | BBA_06821 | -1.09 | 2.10E-07 | 9.25E-07 | down | hypothetical protein BBA_06821                      |
| 19891643 | BBA_08631 | -1.09 | 1.63E-07 | 7.25E-07 | down | hypothetical protein BBA_08631                      |
| 19892479 | BBA_09467 | -1.09 | 5.17E-09 | 2.75E-08 | down | hypothetical protein BBA_09467                      |
| 19890722 | BBA_07710 | -1.09 | 1.01E-04 | 2.98E-04 | down | hypothetical protein BBA_07710                      |
| 19892045 | BBA_09033 | -1.09 | 9.05E-13 | 6.51E-12 | down | hypothetical protein BBA_09033                      |
| 19886615 | BBA_03603 | -1.09 | 3.11E-10 | 1.85E-09 | down | stomatin-like protein                               |
| 19886476 | BBA_03464 | -1.09 | 1.83E-13 | 1.39E-12 | down | C6 finger domain protein                            |
| 19884097 | BBA_01085 | -1.09 | 1.16E-07 | 5.29E-07 | down | peptidase family M1                                 |
| 19886869 | BBA_03857 | -1.09 | 3.58E-13 | 2.66E-12 | down | hypothetical protein BBA_03857                      |
| 19886285 | BBA_03273 | -1.09 | 1.37E-15 | 1.19E-14 | down | hypothetical protein BBA_03273                      |
| 19891518 | BBA_08506 | -1.08 | 1.45E-15 | 1.26E-14 | down | multidrug and toxin extrusion protein               |
| 19892219 | BBA_09207 | -1.08 | 1.55E-02 | 2.91E-02 | down | TPR repeat protein                                  |
| 19886511 | BBA_03499 | -1.08 | 9.42E-06 | 3.29E-05 | down | hypothetical protein BBA_03499                      |
| 19887969 | BBA_04957 | -1.08 | 2.30E-10 | 1.38E-09 | down | potassium/sodium efflux P-type ATPase               |
| 19883318 | BBA_00306 | -1.08 | 2.04E-07 | 9.01E-07 | down | DEAD/DEAH box helicase                              |
| 19883783 | BBA_00771 | -1.08 | 3.00E-04 | 8.14E-04 | down | Ankyrin repeat protein                              |
| 19883618 | BBA_00606 | -1.08 | 1.53E-13 | 1.17E-12 | down | hypothetical protein BBA_00606                      |
| 19886503 | BBA_03491 | -1.08 | 4.23E-14 | 3.35E-13 | down | tousled-like kinase                                 |
| 19889489 | BBA_06477 | -1.08 | 2.51E-05 | 8.13E-05 | down | hypothetical protein BBA_06477                      |
| 19887673 | BBA_04661 | -1.08 | 5.90E-12 | 4.01E-11 | down | hypothetical protein BBA_04661                      |
| 19885434 | BBA_02422 | -1.08 | 9.47E-05 | 2.79E-04 | down | hypothetical protein BBA_02422                      |
| 19886006 | BBA_02994 | -1.08 | 2.59E-12 | 1.79E-11 | down | glycosyltransferase family 20                       |
| 19891089 | BBA_08077 | -1.08 | 1.02E-10 | 6.35E-10 | down | hypothetical protein BBA_08077                      |
| 19884262 | BBA_01250 | -1.08 | 1.45E-05 | 4.86E-05 | down | DNA polymerase II large subunit-like protein        |
| 19885044 | BBA_02032 | -1.08 | 5.99E-07 | 2.49E-06 | down | dipeptidyl peptidase III                            |
| 19891170 | BBA_08158 | -1.08 | 6.68E-06 | 2.38E-05 | down | ATP-dependent protease La domain-containing protein |
| 19889036 | BBA_06024 | -1.07 | 6.32E-06 | 2.26E-05 | down | hypothetical protein BBA_06024                      |
| 19889071 | BBA_06059 | -1.07 | 1.73E-13 | 1.32E-12 | down | monooxygenase-like protein                          |
| 19892094 | BBA_09082 | -1.07 | 3.61E-05 | 1.14E-04 | down | acetylornithine deacetylase                         |
| 19889389 | BBA_06377 | -1.07 | 8.02E-09 | 4.18E-08 | down | RasGEF domain-containing protein                    |
| 19883102 | BBA_00090 | -1.07 | 2.17E-09 | 1.20E-08 | down | aryl-alcohol oxidase/vanillyl-alcohol oxidase       |
| 19883862 | BBA_00850 | -1.07 | 1.27E-10 | 7.77E-10 | down |                                                     |
| 19883358 | BBA_00346 | -1.07 | 2.05E-13 | 1.56E-12 | down | fructosyl amino acid oxidase                        |
| 19883637 | BBA_00625 | -1.07 | 1.99E-08 | 9.92E-08 | down | Glycoside hydrolase, catalytic core                 |
| 19885692 | BBA_02680 | -1.06 | 4.29E-14 | 3.39E-13 | down | hypothetical protein BBA_02680                      |
| 19886865 | BBA_03853 | -1.06 | 2.50E-06 | 9.51E-06 | down | hypothetical protein BBA_03853                      |

|          |           |       |          |          |      |                                                |
|----------|-----------|-------|----------|----------|------|------------------------------------------------|
| 19892556 | BBA_09544 | -1.06 | 4.06E-07 | 1.73E-06 | down | restless-like transposase                      |
| 19885805 | BBA_02793 | -1.06 | 1.15E-12 | 8.18E-12 | down | ankyrin repeat domain-containing protein 28    |
| 19883860 | BBA_00848 | -1.06 | 6.98E-11 | 4.38E-10 | down | copper homeostasis protein cutC                |
| 19891265 | BBA_08253 | -1.06 | 1.86E-03 | 4.31E-03 | down | 2,3-cyclic-nucleotide 2-phosphodiesterase      |
| 19886452 | BBA_03440 | -1.06 | 9.95E-13 | 7.14E-12 | down | hypothetical protein BBA_03440                 |
| 19890939 | BBA_07927 | -1.06 | 2.45E-13 | 1.84E-12 | down | C2 domain-containing protein                   |
| 19888760 | BBA_05748 | -1.06 | 2.14E-04 | 5.95E-04 | down | hypothetical protein BBA_05748                 |
| 19892612 | BBA_09600 | -1.06 | 5.19E-09 | 2.77E-08 | down | FluG domain-containing protein                 |
| 19891505 | BBA_08493 | -1.06 | 1.53E-07 | 6.83E-07 | down | Acyl-CoA N-acyltransferase                     |
| 19886639 | BBA_03627 | -1.06 | 1.96E-14 | 1.60E-13 | down | Hsp90 associated co-chaperone                  |
| 19887986 | BBA_04974 | -1.06 | 4.15E-09 | 2.23E-08 | down | aminotransferase family protein (LolT)         |
| 19889086 | BBA_06074 | -1.06 | 2.03E-07 | 8.95E-07 | down | extensin-like protein                          |
| 19893365 | BBA_10353 | -1.06 | 5.46E-07 | 2.29E-06 | down | reverse transcriptase                          |
| 19889807 | BBA_06795 | -1.05 | 4.04E-03 | 8.72E-03 | down | hypothetical protein BBA_06795                 |
| 19891119 | BBA_08107 | -1.05 | 1.54E-05 | 5.14E-05 | down | MIF4G domain-containing protein                |
| 19891145 | BBA_08133 | -1.05 | 1.04E-12 | 7.43E-12 | down | U-box domain-containing protein                |
| 19893338 | BBA_10326 | -1.05 | 2.34E-04 | 6.46E-04 | down | hypothetical protein BBA_10326                 |
| 19885771 | BBA_02759 | -1.05 | 2.17E-07 | 9.52E-07 | down | hypothetical protein BBA_02759                 |
| 19890743 | BBA_07731 | -1.05 | 9.96E-13 | 7.14E-12 | down | ankyrin repeat domain protein                  |
| 19890130 | BBA_07118 | -1.05 | 4.27E-12 | 2.92E-11 | down | bacterial-type extracellular deoxyribonuclease |
| 19890561 | BBA_07549 | -1.05 | 1.75E-07 | 7.77E-07 | down | MFS transporter                                |
| 19885612 | BBA_02600 | -1.05 | 1.29E-04 | 3.73E-04 | down | MFS multidrug transporter                      |
| 19886439 | BBA_03427 | -1.05 | 2.06E-06 | 7.94E-06 | down | tricarballoylate dehydrogenase                 |
| 19883629 | BBA_00617 | -1.05 | 3.12E-08 | 1.52E-07 | down | ankyrin repeat protein                         |
| 19883839 | BBA_00827 | -1.05 | 3.92E-06 | 1.45E-05 | down | RNA polymerase III RPC4                        |
| 19886801 | BBA_03789 | -1.05 | 1.09E-03 | 2.65E-03 | down | hypothetical protein BBA_03789                 |
| 19887622 | BBA_04610 | -1.05 | 2.78E-09 | 1.52E-08 | down | tRNA wybutosine-synthesizing protein           |
| 19883947 | BBA_00935 | -1.04 | 1.08E-13 | 8.32E-13 | down | putative histidine acid phosphatase            |
| 19884160 | BBA_01148 | -1.04 | 4.66E-04 | 1.22E-03 | down | hypothetical protein BBA_01148                 |
| 19887932 | BBA_04920 | -1.04 | 3.71E-12 | 2.55E-11 | down | hypothetical protein BBA_04920                 |
| 19884608 | BBA_01596 | -1.04 | 2.74E-03 | 6.12E-03 | down | hypothetical protein BBA_01596                 |
| 19890647 | BBA_07635 | -1.04 | 3.84E-09 | 2.08E-08 | down | SAM-dependent methyltransferase                |
| 19890623 | BBA_07611 | -1.04 | 1.32E-06 | 5.26E-06 | down | non-ribosomal peptide synthetase               |
| 19889532 | BBA_06520 | -1.04 | 2.64E-07 | 1.14E-06 | down | calcineurin-like phosphoesterase               |
| 19888833 | BBA_05821 | -1.04 | 1.38E-12 | 9.78E-12 | down | oxidoreductase family protein                  |
| 19892785 | BBA_09773 | -1.04 | 1.03E-11 | 6.91E-11 | down | Cytochrome P450 CYP620D1                       |
| 19885924 | BBA_02912 | -1.04 | 6.39E-10 | 3.70E-09 | down | CoA binding domain-containing protein          |
| 19885768 | BBA_02756 | -1.04 | 2.35E-10 | 1.41E-09 | down | TPR Domain containing protein                  |
| 19884016 | BBA_01004 | -1.04 | 2.28E-07 | 9.94E-07 | down | NUDIX domain-containing protein                |
| 19889480 | BBA_06468 | -1.04 | 1.35E-09 | 7.62E-09 | down | ABC transporter                                |
| 19889861 | BBA_06849 | -1.04 | 8.57E-10 | 4.88E-09 | down | thermotolerance protein                        |
| 19891169 | BBA_08157 | -1.04 | 5.88E-04 | 1.51E-03 | down | hypothetical protein BBA_08157                 |
| 19886201 | BBA_03189 | -1.04 | 4.67E-07 | 1.97E-06 | down | structural toxin protein RtxA                  |
| 19884466 | BBA_01454 | -1.04 | 4.36E-13 | 3.22E-12 | down | aldehyde dehydrogenase                         |
| 19885287 | BBA_02275 | -1.03 | 6.45E-06 | 2.30E-05 | down | Cytochrome P450 CYP520A1                       |
| 19885456 | BBA_02444 | -1.03 | 5.09E-06 | 1.85E-05 | down | OHCU decarboxylase                             |
| 19888903 | BBA_05891 | -1.03 | 3.92E-10 | 2.31E-09 | down | hypothetical protein BBA_05891                 |
| 19893318 | BBA_10306 | -1.03 | 2.27E-07 | 9.93E-07 | down | hypothetical protein BBA_10306                 |
| 19891489 | BBA_08477 | -1.03 | 3.56E-11 | 2.29E-10 | down | ATG C terminal domain-containing protein       |
| 19883577 | BBA_00565 | -1.03 | 2.89E-11 | 1.88E-10 | down | annexin-like protein                           |
| 19887490 | BBA_04478 | -1.03 | 4.47E-06 | 1.64E-05 | down | ankyrin repeat protein                         |
| 19890209 | BBA_07197 | -1.03 | 4.70E-14 | 3.69E-13 | down | Peptidase M19, renal dipeptidase               |
| 19889972 | BBA_06960 | -1.03 | 1.53E-11 | 1.01E-10 | down | alternative oxidase                            |
| 19885045 | BBA_02033 | -1.03 | 1.50E-13 | 1.15E-12 | down | feruloyl esterase A precursor                  |
| 19892456 | BBA_09444 | -1.03 | 8.09E-12 | 5.44E-11 | down | hypothetical protein BBA_09444                 |
| 19888922 | BBA_05910 | -1.02 | 1.08E-10 | 6.68E-10 | down | isoprenylcysteine carboxyl methyltransferase   |
| 19890696 | BBA_07684 | -1.02 | 6.76E-04 | 1.72E-03 | down | BTB/POZ domain protein                         |
| 19887315 | BBA_04303 | -1.02 | 1.01E-07 | 4.63E-07 | down | LYAR-type C2HC zinc finger protein             |
| 19890312 | BBA_07300 | -1.02 | 6.49E-05 | 1.96E-04 | down | C6 transcription factor                        |
| 19891098 | BBA_08086 | -1.02 | 2.89E-13 | 2.16E-12 | down | hypothetical protein BBA_08086                 |
| 19884441 | BBA_01429 | -1.02 | 1.72E-06 | 6.71E-06 | down | GTPase-activator protein for Ras-like GTPase   |

|          |           |       |          |          |      |                                                       |
|----------|-----------|-------|----------|----------|------|-------------------------------------------------------|
| 19885217 | BBA_02205 | -1.02 | 2.90E-05 | 9.31E-05 | down | G-protein coupled receptor                            |
| 19891093 | BBA_08081 | -1.02 | 3.09E-08 | 1.51E-07 | down | La domain-containing protein                          |
| 19889572 | BBA_06560 | -1.02 | 2.21E-12 | 1.54E-11 | down | ABC transporter                                       |
| 19884614 | BBA_01602 | -1.02 | 3.59E-05 | 1.14E-04 | down | kynurenine 3-monooxygenase                            |
| 19888839 | BBA_05827 | -1.02 | 3.09E-12 | 2.13E-11 | down | siderophore iron transporter                          |
| 19889582 | BBA_06570 | -1.01 | 2.39E-09 | 1.31E-08 | down | Ankyrin repeat protein                                |
| 19888865 | BBA_05853 | -1.01 | 8.21E-03 | 1.65E-02 | down | LysM domain-containing protein                        |
| 19892480 | BBA_09468 | -1.01 | 5.94E-11 | 3.75E-10 | down | WSC domain-containing protein                         |
| 19883367 | BBA_00355 | -1.01 | 2.91E-13 | 2.17E-12 | down | alanine racemase domain protein                       |
| 19891966 | BBA_08954 | -1.01 | 1.15E-05 | 3.95E-05 | down | retrotransposon protein, putative, Ty1-copia subclass |
| 19883208 | BBA_00196 | -1.01 | 5.81E-03 | 1.21E-02 | down | tat pathway signal sequence                           |
| 19884192 | BBA_01180 | -1.01 | 8.07E-11 | 5.03E-10 | down | homeobox domain-containing protein                    |
| 19891664 | BBA_08652 | -1.01 | 4.93E-09 | 2.63E-08 | down | transcription factor tfiic complex subunit sfc6       |
| 19892345 | BBA_09333 | -1.01 | 2.23E-04 | 6.17E-04 | down | C2H2 finger domain protein, putative                  |
| 19892539 | BBA_09527 | -1.01 | 4.46E-07 | 1.88E-06 | down | asparagine synthetase                                 |
| 19890105 | BBA_07093 | -1.01 | 5.01E-05 | 1.55E-04 | down | RING finger protein                                   |
| 19888516 | BBA_05504 | -1.01 | 9.98E-11 | 6.19E-10 | down | Immunoglobulin E-set                                  |
| 19891435 | BBA_08423 | -1.01 | 1.13E-05 | 3.88E-05 | down | lipase-like protein                                   |
| 19891403 | BBA_08391 | -1.01 | 1.98E-11 | 1.30E-10 | down | thiamine pyrophosphate enzyme                         |
| 19883678 | BBA_00666 | -1.01 | 4.27E-06 | 1.57E-05 | down | hypothetical protein BBA_00666                        |
| 19888932 | BBA_05920 | -1.01 | 2.06E-09 | 1.14E-08 | down | hypothetical protein BBA_05920                        |
| 19892303 | BBA_09291 | -1.01 | 1.10E-04 | 3.21E-04 | down | nucleoplasmin-like protein                            |
| 19891800 | BBA_08788 | -1.00 | 1.72E-06 | 6.72E-06 | down | MFS sugar transporter, putative                       |
| 19883710 | BBA_00698 | -1.00 | 5.96E-10 | 3.46E-09 | down | restless-like transposase                             |
| 19892737 | BBA_09725 | 1.00  | 7.33E-09 | 3.84E-08 | up   | integral membrane protein, putative                   |
| 19887484 | BBA_04472 | 1.00  | 9.64E-12 | 6.46E-11 | up   | PET8 protein                                          |
| 19885917 | BBA_02905 | 1.00  | 1.46E-04 | 4.18E-04 | up   | protein transport protein YOS1                        |
| 19888049 | BBA_05037 | 1.01  | 2.44E-07 | 1.06E-06 | up   | cyclophilin A                                         |
| 19889843 | BBA_06831 | 1.01  | 1.91E-09 | 1.06E-08 | up   | major facilitator superfamily transporter             |
| 19883451 | BBA_00439 | 1.01  | 8.34E-11 | 5.19E-10 | up   | alanyl-tRNA synthetase                                |
| 19884891 | BBA_01879 | 1.01  | 4.63E-14 | 3.64E-13 | up   | glycosyltransferase family 17                         |
| 19888444 | BBA_05432 | 1.01  | 8.03E-15 | 6.71E-14 | up   | hypothetical protein BBA_05432                        |
| 19890760 | BBA_07748 | 1.01  | 1.51E-11 | 1.00E-10 | up   | ABC transporter                                       |
| 19891398 | BBA_08386 | 1.01  | 8.60E-18 | 8.44E-17 | up   | pyruvate decarboxylase                                |
| 19887693 | BBA_04681 | 1.01  | 1.25E-10 | 7.63E-10 | up   | haloacid dehalogenase                                 |
| 19888820 | BBA_05808 | 1.01  | 2.08E-15 | 1.79E-14 | up   | cell wall protein                                     |
| 19889098 | BBA_06086 | 1.01  | 4.82E-07 | 2.03E-06 | up   |                                                       |
| 19884123 | BBA_01111 | 1.02  | 1.57E-15 | 1.36E-14 | up   | Cysteine synthase                                     |
| 19892615 | BBA_09603 | 1.02  | 5.02E-06 | 1.82E-05 | up   | transposase-like protein                              |
| 19890579 | BBA_07567 | 1.02  | 9.21E-13 | 6.62E-12 | up   | nonspecific lipid-transfer protein                    |
| 19891225 | BBA_08213 | 1.02  | 4.96E-15 | 4.18E-14 | up   | hypothetical protein BBA_08213                        |
| 19885174 | BBA_02162 | 1.02  | 3.78E-06 | 1.40E-05 | up   | hypothetical protein BBA_02162                        |
| 19890415 | BBA_07403 | 1.02  | 5.80E-18 | 5.72E-17 | up   | hypothetical protein BBA_07403                        |
| 19889954 | BBA_06942 | 1.02  | 4.14E-06 | 1.53E-05 | up   | MFS multidrug transporter, putative                   |
| 19887134 | BBA_04122 | 1.02  | 2.40E-08 | 1.18E-07 | up   | MAK1-like monooxygenase                               |
| 19883532 | BBA_00520 | 1.02  | 1.52E-16 | 1.39E-15 | up   | heterokaryon incompatibility protein Het-C            |
| 19887680 | BBA_04668 | 1.03  | 5.98E-11 | 3.78E-10 | up   | phenylacrylic acid decarboxylase, putative            |
| 19891621 | BBA_08609 | 1.03  | 4.08E-09 | 2.20E-08 | up   | hypothetical protein BBA_08609                        |
| 19889435 | BBA_06423 | 1.03  | 4.62E-15 | 3.91E-14 | up   | cation transport ATPase                               |
| 19892385 | BBA_09373 | 1.03  | 1.71E-16 | 1.56E-15 | up   | inorganic pyrophosphatase                             |
| 19886076 | BBA_03064 | 1.03  | 4.16E-08 | 1.99E-07 | up   | hypothetical protein BBA_03064                        |
| 19892152 | BBA_09140 | 1.03  | 1.78E-17 | 1.71E-16 | up   | hypothetical protein BBA_09140                        |
| 19891981 | BBA_08969 | 1.03  | 2.23E-09 | 1.23E-08 | up   | hypothetical protein BBA_08969                        |
| 19883025 | BBA_00013 | 1.04  | 1.33E-12 | 9.42E-12 | up   | cellobiose dehydrogenase, putative                    |
| 19884610 | BBA_01598 | 1.04  | 2.89E-18 | 2.91E-17 | up   | proclavamate amidinohydrolase                         |
| 19889888 | BBA_06876 | 1.04  | 3.18E-13 | 2.37E-12 | up   | AGC kinase                                            |
| 19887559 | BBA_04547 | 1.04  | 4.94E-17 | 4.64E-16 | up   | hypothetical protein BBA_04547                        |
| 19891616 | BBA_08604 | 1.04  | 4.53E-06 | 1.66E-05 | up   | hypothetical protein BBA_08604                        |
| 19886888 | BBA_03876 | 1.04  | 1.80E-10 | 1.09E-09 | up   | hypothetical protein BBA_03876                        |
| 19891016 | BBA_08004 | 1.04  | 3.30E-05 | 1.05E-04 | up   | complex 1 protein (LYR family) protein                |
| 19883399 | BBA_00387 | 1.04  | 8.47E-13 | 6.12E-12 | up   | RPEL repeat protein                                   |

|          |           |      |          |          |    |                                                     |
|----------|-----------|------|----------|----------|----|-----------------------------------------------------|
| 19889166 | BBA_06154 | 1.04 | 8.82E-11 | 5.49E-10 | up | triacylglycerol lipase                              |
| 19892770 | BBA_09758 | 1.04 | 4.43E-13 | 3.27E-12 | up | serum paraoxonase/arylesterase family protein       |
| 19891348 | BBA_08336 | 1.04 | 1.10E-18 | 1.13E-17 | up | CAAX amino terminal protease                        |
| 19886983 | BBA_03971 | 1.04 | 8.66E-18 | 8.49E-17 | up | Glycoside hydrolase, family 31                      |
| 19887044 | BBA_04032 | 1.04 | 5.99E-17 | 5.61E-16 | up | hydrolase, alpha/beta fold family protein           |
| 19892224 | BBA_09212 | 1.04 | 1.20E-07 | 5.47E-07 | up | hypothetical protein BBA_09212                      |
| 19888959 | BBA_05947 | 1.05 | 2.09E-05 | 6.85E-05 | up | short chain dehydrogenase                           |
| 19891186 | BBA_08174 | 1.05 | 5.28E-04 | 1.37E-03 | up | putative Heat-labile enterotoxin IIB, A chain       |
| 19892415 | BBA_09403 | 1.05 | 1.69E-04 | 4.78E-04 | up | bZIP transcription factor                           |
| 19884701 | BBA_01689 | 1.05 | 1.44E-07 | 6.47E-07 | up | Vacuolar ATP synthase subunit F                     |
| 19892075 | BBA_09063 | 1.05 | 1.15E-05 | 3.96E-05 | up | hypothetical protein BBA_09063                      |
| 19888836 | BBA_05824 | 1.05 | 8.43E-08 | 3.89E-07 | up | thioesterase superfamily protein                    |
| 19888753 | BBA_05741 | 1.05 | 1.10E-15 | 9.58E-15 | up | 4-hydroxyacetophenone monooxygenase                 |
| 19888984 | BBA_05972 | 1.05 | 8.74E-13 | 6.30E-12 | up | hypothetical protein BBA_05972                      |
| 19892709 | BBA_09697 | 1.05 | 8.98E-09 | 4.65E-08 | up | C2H2 transcription factor                           |
| 19888056 | BBA_05044 | 1.06 | 2.65E-12 | 1.84E-11 | up | FAD monooxygenase                                   |
| 19885153 | BBA_02141 | 1.06 | 1.96E-19 | 2.09E-18 | up | mannitol-1-phosphate dehydrogenase                  |
| 19891787 | BBA_08775 | 1.06 | 1.78E-11 | 1.17E-10 | up | 6-O-methylguanine DNA methyltransferase             |
| 19893308 | BBA_10296 | 1.06 | 1.23E-10 | 7.55E-10 | up | reverse transcriptase                               |
| 19892493 | BBA_09481 | 1.06 | 4.50E-20 | 4.98E-19 | up | quininate permease                                  |
| 19889613 | BBA_06601 | 1.06 | 2.09E-10 | 1.25E-09 | up | hypothetical protein BBA_06601                      |
| 19885115 | BBA_02103 | 1.06 | 8.76E-08 | 4.03E-07 | up | spindle assembly checkpoint kinase                  |
| 19886596 | BBA_03584 | 1.06 | 4.04E-10 | 2.37E-09 | up | ABC transporter                                     |
| 19887110 | BBA_04098 | 1.06 | 1.52E-07 | 6.80E-07 | up | hypothetical protein BBA_04098                      |
| 19885225 | BBA_02213 | 1.06 | 3.94E-13 | 2.92E-12 | up | hypothetical protein BBA_02213                      |
| 19885519 | BBA_02507 | 1.06 | 6.15E-21 | 7.12E-20 | up | fungus specific transcription factor                |
| 19883250 | BBA_00238 | 1.06 | 1.42E-12 | 1.00E-11 | up | chaperone protein hchA                              |
| 19893238 | BBA_10226 | 1.06 | 1.10E-05 | 3.81E-05 | up | restless-like transposase                           |
| 19892969 | BBA_09957 | 1.07 | 2.64E-16 | 2.39E-15 | up | hypothetical protein BBA_09957                      |
| 19887508 | BBA_04496 | 1.07 | 7.92E-07 | 3.23E-06 | up | putative sugar transporter                          |
| 19891355 | BBA_08343 | 1.07 | 1.37E-04 | 3.93E-04 | up | hypothetical protein BBA_08343                      |
| 19889811 | BBA_06799 | 1.07 | 1.27E-08 | 6.49E-08 | up | hypothetical protein BBA_06799                      |
| 19887779 | BBA_04767 | 1.07 | 8.70E-07 | 3.54E-06 | up | glycosyl hydrolase family 76                        |
| 19883046 | BBA_00034 | 1.07 | 1.56E-20 | 1.76E-19 | up | group II pyridoxal-5-phosphate decarboxylase        |
| 19892559 | BBA_09547 | 1.07 | 3.54E-11 | 2.28E-10 | up | transposase-like protein                            |
| 19888459 | BBA_05447 | 1.08 | 2.03E-07 | 8.96E-07 | up |                                                     |
| 19890101 | BBA_07089 | 1.08 | 2.86E-15 | 2.45E-14 | up | exostosin 2                                         |
| 19887052 | BBA_04040 | 1.08 | 1.70E-11 | 1.13E-10 | up | MFS monocarboxylate transporter                     |
| 19883311 | BBA_00299 | 1.08 | 9.62E-16 | 8.44E-15 | up | hypothetical protein BBA_00299                      |
| 19886472 | BBA_03460 | 1.08 | 1.10E-20 | 1.25E-19 | up | phosphatidylinositol transfer protein CSR1          |
| 19891063 | BBA_08051 | 1.08 | 1.34E-08 | 6.80E-08 | up | hypothetical protein BBA_08051                      |
| 19887384 | BBA_04372 | 1.08 | 1.03E-17 | 1.01E-16 | up | DNA repair protein (Rad57), putative                |
| 19893203 | BBA_10191 | 1.08 | 2.05E-05 | 6.73E-05 | up | hypothetical protein BBA_10191                      |
| 19891590 | BBA_08578 | 1.08 | 1.54E-09 | 8.64E-09 | up | Acyl-CoA N-acyltransferase                          |
| 19892912 | BBA_09900 | 1.08 | 1.02E-04 | 3.00E-04 | up | ankyrin 2,3/unc44                                   |
| 19884295 | BBA_01283 | 1.09 | 9.74E-21 | 1.11E-19 | up | major facilitator superfamily transporter           |
| 19891523 | BBA_08511 | 1.09 | 3.77E-14 | 3.00E-13 | up | short-chain dehydrogenase/reductase 2               |
| 19893264 | BBA_10252 | 1.09 | 1.11E-05 | 3.84E-05 | up | hypothetical protein BBA_10252                      |
| 19883125 | BBA_00113 | 1.09 | 7.72E-11 | 4.83E-10 | up | hypothetical protein BBA_00113                      |
| 19891422 | BBA_08410 | 1.09 | 1.73E-12 | 1.22E-11 | up | ppic-type ppiase domain-containing protein          |
| 19886487 | BBA_03475 | 1.09 | 4.97E-08 | 2.36E-07 | up | bicyclomycin resistance protein                     |
| 19893019 | BBA_10007 | 1.09 | 1.23E-05 | 4.20E-05 | up | hypothetical protein BBA_10007                      |
| 19888616 | BBA_05604 | 1.09 | 1.61E-16 | 1.48E-15 | up | hypothetical protein BBA_05604                      |
| 19886686 | BBA_03674 | 1.09 | 4.13E-12 | 2.83E-11 | up | Formyl transferase                                  |
| 19891313 | BBA_08301 | 1.09 | 3.37E-11 | 2.17E-10 | up | hypothetical protein BBA_08301                      |
| 19890856 | BBA_07844 | 1.09 | 6.47E-16 | 5.72E-15 | up | O-methyltransferase, family 3                       |
| 19884705 | BBA_01693 | 1.09 | 9.02E-21 | 1.03E-19 | up | major facilitator superfamily transporter           |
| 19884605 | BBA_01593 | 1.09 | 2.41E-20 | 2.71E-19 | up | quinone oxidoreductase                              |
| 19886725 | BBA_03713 | 1.09 | 1.67E-09 | 9.29E-09 | up | L-PSP endoribonuclease family protein               |
| 19890422 | BBA_07410 | 1.09 | 1.44E-14 | 1.19E-13 | up | glutathione S-transferase domain-containing protein |
| 19888020 | BBA_05008 | 1.09 | 9.34E-09 | 4.83E-08 | up | hypothetical protein BBA_05008                      |

|          |           |      |          |          |    |                                                      |
|----------|-----------|------|----------|----------|----|------------------------------------------------------|
| 19885027 | BBA_02015 | 1.09 | 3.74E-13 | 2.78E-12 | up | hypothetical protein BBA_02015                       |
| 19885205 | BBA_02193 | 1.10 | 4.51E-13 | 3.32E-12 | up | hypothetical protein BBA_02193                       |
| 19885439 | BBA_02427 | 1.10 | 1.34E-07 | 6.03E-07 | up | conidiation-specific protein (con-13)                |
| 19888762 | BBA_05750 | 1.10 | 8.05E-09 | 4.20E-08 | up | thioesterase superfamily protein                     |
| 19883993 | BBA_00981 | 1.10 | 5.17E-08 | 2.45E-07 | up | hypothetical protein BBA_00981                       |
| 19885566 | BBA_02554 | 1.10 | 6.86E-07 | 2.83E-06 | up | thioredoxin reductase GlIT                           |
| 19890578 | BBA_07566 | 1.10 | 8.46E-17 | 7.86E-16 | up | histidinol phosphate phosphatase HisJ family protein |
| 19888617 | BBA_05605 | 1.10 | 3.41E-19 | 3.60E-18 | up | formyl transferase domain-containing protein         |
| 19893304 | BBA_10292 | 1.10 | 4.15E-12 | 2.84E-11 | up | cytochrome c oxidase assembly factor                 |
| 19892531 | BBA_09519 | 1.10 | 1.57E-07 | 7.02E-07 | up | phosphotransferase enzyme family protein             |
| 19887527 | BBA_04515 | 1.10 | 4.00E-08 | 1.92E-07 | up | hypothetical protein BBA_04515                       |
| 19892036 | BBA_09024 | 1.10 | 1.28E-13 | 9.80E-13 | up | transposase-like protein                             |
| 19891565 | BBA_08553 | 1.10 | 2.47E-07 | 1.07E-06 | up | hypothetical protein BBA_08553                       |
| 19892177 | BBA_09165 | 1.11 | 2.93E-10 | 1.74E-09 | up | tetratricopeptide-like protein                       |
| 19885743 | BBA_02731 | 1.11 | 2.30E-21 | 2.70E-20 | up | hypothetical protein BBA_02731                       |
| 19892716 | BBA_09704 | 1.11 | 8.17E-21 | 9.41E-20 | up | DUF89 domain protein                                 |
| 19886339 | BBA_03327 | 1.11 | 7.74E-13 | 5.61E-12 | up | YCII-related domain protein                          |
| 19883225 | BBA_00213 | 1.11 | 5.43E-13 | 3.99E-12 | up | nitrilotriacetate monooxygenase component B          |
| 19885485 | BBA_02473 | 1.11 | 2.54E-09 | 1.39E-08 | up | ribosomal protein S19                                |
| 19890385 | BBA_07373 | 1.11 | 1.85E-12 | 1.30E-11 | up | hypothetical protein BBA_07373                       |
| 19886027 | BBA_03015 | 1.11 | 3.74E-21 | 4.37E-20 | up | class I hydrophobin                                  |
| 19886027 | BBA_03015 | 1.11 | 3.74E-21 | 4.37E-20 | up | class I hydrophobin                                  |
| 19886267 | BBA_03255 | 1.11 | 5.65E-13 | 4.14E-12 | up | hypothetical protein BBA_03255                       |
| 19885034 | BBA_02022 | 1.11 | 2.55E-20 | 2.86E-19 | up | hypothetical protein BBA_02022                       |
| 19893269 | BBA_10257 | 1.12 | 5.58E-06 | 2.01E-05 | up | hypothetical protein BBA_10257                       |
| 19891992 | BBA_08980 | 1.12 | 1.52E-04 | 4.32E-04 | up | hypothetical protein BBA_08980                       |
| 19891937 | BBA_08925 | 1.12 | 2.52E-10 | 1.50E-09 | up | O-methyltransferase, family 3                        |
| 19883413 | BBA_00401 | 1.12 | 8.76E-12 | 5.89E-11 | up | hypothetical protein BBA_00401                       |
| 19886427 | BBA_03415 | 1.12 | 6.58E-08 | 3.07E-07 | up | calcofluor white hypersensitive protein              |
| 19892209 | BBA_09197 | 1.12 | 1.73E-11 | 1.14E-10 | up | interferon-induced GTP-binding protein Mx            |
| 19883040 | BBA_00028 | 1.12 | 4.37E-19 | 4.58E-18 | up | oxysterol-binding family protein                     |
| 19887041 | BBA_04029 | 1.12 | 5.48E-20 | 6.01E-19 | up | amino acid permease                                  |
| 19885375 | BBA_02363 | 1.12 | 1.18E-17 | 1.14E-16 | up | hypothetical protein BBA_02363                       |
| 19890545 | BBA_07533 | 1.12 | 3.12E-19 | 3.30E-18 | up | NADP-dependent alcohol dehydrogenase                 |
| 19883060 | BBA_00048 | 1.13 | 5.03E-10 | 2.93E-09 | up | hypothetical protein BBA_00048                       |
| 19886592 | BBA_03580 | 1.13 | 3.52E-22 | 4.27E-21 | up | FkbM family methyltransferase                        |
| 19885374 | BBA_02362 | 1.13 | 1.93E-19 | 2.07E-18 | up | C-5 cytosine-specific DNA methylase                  |
| 19886946 | BBA_03934 | 1.13 | 4.56E-22 | 5.52E-21 | up | Cytochrome P450 CYP617A1                             |
| 19889673 | BBA_06661 | 1.13 | 5.32E-05 | 1.64E-04 | up | nonribosomal peptide synthase, putative              |
| 19889686 | BBA_06674 | 1.14 | 2.32E-07 | 1.01E-06 | up | NADH:flavin oxidoreductase/NADH oxidase              |
| 19888684 | BBA_05672 | 1.14 | 1.45E-16 | 1.34E-15 | up | beta-glucosidase, putative                           |
| 19893230 | BBA_10218 | 1.14 | 8.93E-05 | 2.65E-04 | up |                                                      |
| 19887603 | BBA_04591 | 1.14 | 1.04E-21 | 1.24E-20 | up | glycerophosphoryl diester phosphodiesterase          |
| 19891436 | BBA_08424 | 1.14 | 4.43E-13 | 3.27E-12 | up | nonribosomal peptide synthase, putative              |
| 19884252 | BBA_01240 | 1.14 | 5.37E-21 | 6.24E-20 | up | LysR family regulatory protein                       |
| 19889993 | BBA_06981 | 1.14 | 3.18E-06 | 1.20E-05 | up | cytochrome c oxidase assembly protein COX19          |
| 19884046 | BBA_01034 | 1.14 | 1.79E-17 | 1.73E-16 | up | DNA photolyase                                       |
| 19892939 | BBA_09927 | 1.14 | 3.14E-04 | 8.47E-04 | up | pol-like protein                                     |
| 19887418 | BBA_04406 | 1.14 | 5.80E-23 | 7.32E-22 | up | hypothetical protein BBA_04406                       |
| 19888869 | BBA_05857 | 1.15 | 7.95E-17 | 7.41E-16 | up | short chain dehydrogenase                            |
| 19891399 | BBA_08387 | 1.15 | 2.06E-20 | 2.32E-19 | up | aromatic amino acid aminotransferase                 |
| 19886916 | BBA_03904 | 1.15 | 7.24E-06 | 2.56E-05 | up | SCP-like extracellular protein, putative             |
| 19885126 | BBA_02114 | 1.15 | 3.09E-18 | 3.09E-17 | up | mitochondrial phosphate carrier protein              |
| 19890344 | BBA_07332 | 1.15 | 2.02E-06 | 7.80E-06 | up | aspartyl proteinase                                  |
| 19893014 | BBA_10002 | 1.16 | 7.76E-05 | 2.32E-04 | up | hypothetical protein BBA_10002                       |
| 19890170 | BBA_07158 | 1.16 | 6.33E-11 | 3.99E-10 | up | hypothetical protein BBA_07158                       |
| 19892660 | BBA_09648 | 1.16 | 4.19E-10 | 2.46E-09 | up | hypothetical protein BBA_09648                       |
| 19886019 | BBA_03007 | 1.16 | 1.09E-12 | 7.78E-12 | up | hypothetical protein BBA_03007                       |
| 19888284 | BBA_05272 | 1.16 | 6.90E-22 | 8.31E-21 | up | ABC transporter                                      |
| 19887635 | BBA_04623 | 1.16 | 6.44E-10 | 3.72E-09 | up | ribosomal protein S14p/S29e                          |
| 19888678 | BBA_05666 | 1.16 | 3.99E-17 | 3.77E-16 | up | MFS transporter                                      |

|          |           |      |          |          |    |                                                      |
|----------|-----------|------|----------|----------|----|------------------------------------------------------|
| 19886133 | BBA_03121 | 1.17 | 5.88E-17 | 5.51E-16 | up | cell surface protein                                 |
| 19888625 | BBA_05613 | 1.17 | 6.07E-10 | 3.51E-09 | up | hypothetical protein BBA_05613                       |
| 19889579 | BBA_06567 | 1.17 | 5.30E-12 | 3.61E-11 | up | Catalase-like domain, heme-dependent                 |
| 19889950 | BBA_06938 | 1.17 | 1.94E-06 | 7.50E-06 | up | phytanoyl-CoA dioxygenase family protein             |
| 19888589 | BBA_05577 | 1.17 | 2.61E-23 | 3.35E-22 | up | SCP-like extracellular protein                       |
| 19883666 | BBA_00654 | 1.17 | 3.53E-06 | 1.32E-05 | up | hypothetical protein BBA_00654                       |
| 19885090 | BBA_02078 | 1.17 | 2.94E-09 | 1.60E-08 | up | density-regulated protein DRP1                       |
| 19892043 | BBA_09031 | 1.17 | 1.48E-14 | 1.22E-13 | up | hypothetical protein BBA_09031                       |
| 19890252 | BBA_07240 | 1.17 | 5.17E-08 | 2.45E-07 | up | hypothetical protein BBA_07240                       |
| 19885643 | BBA_02631 | 1.18 | 6.50E-19 | 6.74E-18 | up | hypothetical protein BBA_02631                       |
| 19885809 | BBA_02797 | 1.18 | 3.83E-17 | 3.62E-16 | up |                                                      |
| 19892279 | BBA_09267 | 1.18 | 1.04E-06 | 4.20E-06 | up | hypothetical protein BBA_09267                       |
| 19891483 | BBA_08471 | 1.18 | 4.69E-09 | 2.51E-08 | up | MFS allantoate transporter, putative                 |
| 19888388 | BBA_05376 | 1.18 | 7.80E-22 | 9.33E-21 | up | alpha-amylase A type-3                               |
| 19892170 | BBA_09158 | 1.18 | 3.13E-06 | 1.18E-05 | up | hypothetical protein BBA_09158                       |
| 19887637 | BBA_04625 | 1.18 | 1.06E-07 | 4.83E-07 | up | hypothetical protein BBA_04625                       |
| 19892489 | BBA_09477 | 1.19 | 4.44E-15 | 3.77E-14 | up | hexose transporter                                   |
| 19883460 | BBA_00448 | 1.19 | 1.07E-08 | 5.45E-08 | up | hypothetical protein BBA_00448                       |
| 19887732 | BBA_04720 | 1.19 | 8.20E-16 | 7.21E-15 | up | hypothetical protein BBA_04720                       |
| 19886051 | BBA_03039 | 1.19 | 2.92E-07 | 1.26E-06 | up | flavin containing amine oxidoreductase               |
| 19891876 | BBA_08864 | 1.19 | 1.12E-16 | 1.04E-15 | up | hypothetical protein BBA_08864                       |
| 19884647 | BBA_01635 | 1.19 | 9.74E-07 | 3.94E-06 | up | Cytochrome P450 CYP570E2                             |
| 19887699 | BBA_04687 | 1.19 | 2.63E-25 | 3.70E-24 | up | nuclear migration protein                            |
| 19883159 | BBA_00147 | 1.19 | 2.62E-11 | 1.71E-10 | up | cutinase-2 protein                                   |
| 19891575 | BBA_08563 | 1.19 | 1.51E-20 | 1.71E-19 | up | ABC transporter, putative                            |
| 19890316 | BBA_07304 | 1.20 | 1.95E-19 | 2.08E-18 | up | malate dehydrogenase, putative                       |
| 19892642 | BBA_09630 | 1.20 | 5.88E-06 | 2.11E-05 | up | hypothetical protein BBA_09630                       |
| 19886765 | BBA_03753 | 1.20 | 4.51E-23 | 5.71E-22 | up | glutamate/Leucine/Phenylalanine/Valine dehydrogenase |
| 19891531 | BBA_08519 | 1.20 | 5.96E-10 | 3.46E-09 | up | lactoylglutathione lyase                             |
| 19886156 | BBA_03144 | 1.20 | 1.44E-04 | 4.11E-04 | up | short chain dehydrogenase                            |
| 19888802 | BBA_05790 | 1.20 | 1.25E-13 | 9.58E-13 | up | hypothetical protein BBA_05790                       |
| 19892997 | BBA_09985 | 1.20 | 1.96E-07 | 8.65E-07 | up | DUF124 domain protein                                |
| 19886013 | BBA_03001 | 1.20 | 3.85E-08 | 1.85E-07 | up | ABC-type Fe3+ transport system                       |
| 19886953 | BBA_03941 | 1.20 | 7.01E-25 | 9.73E-24 | up | hypothetical protein BBA_03941                       |
| 19887112 | BBA_04100 | 1.20 | 3.94E-15 | 3.35E-14 | up | GMC oxidoreductase                                   |
| 19892061 | BBA_09049 | 1.21 | 1.38E-18 | 1.41E-17 | up | RING finger domain protein                           |
| 19885493 | BBA_02481 | 1.21 | 2.65E-13 | 1.98E-12 | up | DUF636 domain-containing protein                     |
| 19883204 | BBA_00192 | 1.21 | 3.40E-08 | 1.64E-07 | up | Ribonuclease H1                                      |
| 19886314 | BBA_03302 | 1.21 | 7.76E-15 | 6.50E-14 | up | histidinolphosphatase-like protein                   |
| 19893131 | BBA_10119 | 1.21 | 2.39E-15 | 2.04E-14 | up | HAD-superfamily subfamily IIA hydrolase              |
| 19893346 | BBA_10334 | 1.21 | 1.11E-12 | 7.93E-12 | up | hypothetical protein BBA_10334                       |
| 19890596 | BBA_07584 | 1.21 | 2.75E-14 | 2.21E-13 | up | MAP kinase kinase skh1/pek1                          |
| 19890879 | BBA_07867 | 1.22 | 1.39E-06 | 5.51E-06 | up | hypothetical protein BBA_07867                       |
| 19892638 | BBA_09626 | 1.22 | 2.10E-05 | 6.89E-05 | up | hypothetical protein BBA_09626                       |
| 19887200 | BBA_04188 | 1.22 | 5.10E-04 | 1.32E-03 | up | tat pathway signal sequence                          |
| 19888282 | BBA_05270 | 1.22 | 3.35E-11 | 2.16E-10 | up | lipase class 2                                       |
| 19884572 | BBA_01560 | 1.22 | 5.57E-12 | 3.79E-11 | up | triose-phosphate transporter                         |
| 19887073 | BBA_04061 | 1.22 | 1.39E-23 | 1.80E-22 | up | tyrosinase 2                                         |
| 19892536 | BBA_09524 | 1.22 | 4.84E-18 | 4.79E-17 | up | agmatine deiminase                                   |
| 19892351 | BBA_09339 | 1.22 | 2.61E-17 | 2.49E-16 | up | CFEM domain-containing protein                       |
| 19889219 | BBA_06207 | 1.22 | 1.72E-12 | 1.21E-11 | up | hypothetical protein BBA_06207                       |
| 19884976 | BBA_01964 | 1.22 | 1.20E-24 | 1.64E-23 | up | ferric-chelate reductase                             |
| 19890788 | BBA_07776 | 1.22 | 8.12E-17 | 7.55E-16 | up | hypothetical protein BBA_07776                       |
| 19888700 | BBA_05688 | 1.22 | 2.14E-07 | 9.41E-07 | up | Arylsulfotransferase-like protein                    |
| 19885695 | BBA_02683 | 1.23 | 2.22E-07 | 9.70E-07 | up | hypothetical protein BBA_02683                       |
| 19884673 | BBA_01661 | 1.23 | 7.33E-17 | 6.84E-16 | up | expression library immunization antigen 1            |
| 19890531 | BBA_07519 | 1.23 | 5.62E-13 | 4.12E-12 | up | glucose sorbosone dehydrogenase                      |
| 19883775 | BBA_00763 | 1.23 | 7.66E-26 | 1.10E-24 | up | glutaryl-CoA dehydrogenase                           |
| 19887058 | BBA_04046 | 1.23 | 3.23E-23 | 4.13E-22 | up | hypothetical protein BBA_04046                       |
| 19888274 | BBA_05262 | 1.24 | 8.87E-07 | 3.61E-06 | up | WSC domain-containing protein                        |
| 19884358 | BBA_01346 | 1.24 | 6.00E-09 | 3.18E-08 | up | hypothetical protein BBA_01346                       |

|          |           |      |          |          |    |                                                        |
|----------|-----------|------|----------|----------|----|--------------------------------------------------------|
| 19891190 | BBA_08178 | 1.24 | 4.10E-14 | 3.25E-13 | up | hydantoinase B/oxoprolinase                            |
| 19891539 | BBA_08527 | 1.24 | 1.39E-13 | 1.07E-12 | up | hypothetical protein BBA_08527                         |
| 19884063 | BBA_01051 | 1.25 | 4.44E-16 | 3.95E-15 | up | tat pathway signal sequence                            |
| 19888674 | BBA_05662 | 1.25 | 1.27E-16 | 1.17E-15 | up | Alpha/beta hydrolase fold-3                            |
| 19891081 | BBA_08069 | 1.25 | 1.83E-06 | 7.11E-06 | up | glycosyl transferase                                   |
| 19888055 | BBA_05043 | 1.25 | 3.88E-06 | 1.44E-05 | up | taurine catabolism dioxygenase TauD                    |
| 19888387 | BBA_05375 | 1.26 | 8.66E-15 | 7.22E-14 | up | ferric reductase transmembrane component 4             |
| 19887936 | BBA_04924 | 1.26 | 1.03E-22 | 1.29E-21 | up | meiotic chromosome segregation protein                 |
| 19886332 | BBA_03320 | 1.26 | 1.62E-08 | 8.18E-08 | up | hypothetical protein BBA_03320                         |
| 19883748 | BBA_00736 | 1.26 | 2.62E-18 | 2.64E-17 | up | hypothetical protein BBA_00736                         |
| 19890633 | BBA_07621 | 1.26 | 4.52E-24 | 5.97E-23 | up | hypothetical protein BBA_07621                         |
| 19890294 | BBA_07282 | 1.26 | 2.18E-23 | 2.81E-22 | up | pristinamycin IIA synthase subunit A                   |
| 19887929 | BBA_04917 | 1.26 | 6.12E-08 | 2.87E-07 | up | mannosylphosphorylation protein MNN4                   |
| 19884638 | BBA_01626 | 1.26 | 3.00E-18 | 3.01E-17 | up | helix-loop-helix DNA-binding domain-containing protein |
| 19892879 | BBA_09867 | 1.26 | 1.62E-18 | 1.65E-17 | up | hypothetical protein BBA_09867                         |
| 19883658 | BBA_00646 | 1.26 | 4.81E-05 | 1.49E-04 | up | hypothetical protein BBA_00646                         |
| 19884690 | BBA_01678 | 1.27 | 4.54E-15 | 3.85E-14 | up | ZIP Zinc transporter family protein                    |
| 19888963 | BBA_05951 | 1.27 | 2.90E-08 | 1.42E-07 | up | hypothetical protein BBA_05951                         |
| 19883483 | BBA_00471 | 1.27 | 4.45E-24 | 5.90E-23 | up | catechol O-methyltransferase                           |
| 19892434 | BBA_09422 | 1.27 | 2.26E-08 | 1.12E-07 | up | hypothetical protein BBA_09422                         |
| 19885004 | BBA_01992 | 1.27 | 3.12E-27 | 4.72E-26 | up | calcineurin-like phosphoesterase                       |
| 19883342 | BBA_00330 | 1.28 | 4.14E-26 | 5.99E-25 | up | succinate-semialdehyde dehydrogenase NADP+             |
| 19885367 | BBA_02355 | 1.28 | 8.91E-08 | 4.10E-07 | up | hypothetical protein BBA_02355                         |
| 19888167 | BBA_05155 | 1.28 | 4.17E-27 | 6.27E-26 | up | extracellular aldololactonase                          |
| 19887696 | BBA_04684 | 1.28 | 3.14E-27 | 4.74E-26 | up | tetratricopeptide repeat domain protein                |
| 19890634 | BBA_07622 | 1.28 | 1.01E-14 | 8.38E-14 | up | yjfl-like protein                                      |
| 19892649 | BBA_09637 | 1.28 | 4.22E-27 | 6.34E-26 | up | hypothetical protein BBA_09637                         |
| 19892280 | BBA_09268 | 1.28 | 1.10E-04 | 3.22E-04 | up | hypothetical protein BBA_09268                         |
| 19887740 | BBA_04728 | 1.29 | 9.77E-20 | 1.06E-18 | up | coenzyme A transferase                                 |
| 19884202 | BBA_01190 | 1.29 | 5.24E-26 | 7.55E-25 | up | fumarylacetoacetate hydrolase                          |
| 19893256 | BBA_10244 | 1.29 | 4.82E-07 | 2.03E-06 | up | hypothetical protein BBA_10244                         |
| 19892146 | BBA_09134 | 1.29 | 1.03E-10 | 6.38E-10 | up | cofilin/tropomyosin-type actin-binding protein         |
| 19884492 | BBA_01480 | 1.29 | 4.55E-24 | 6.00E-23 | up | major facilitator superfamily transporter              |
| 19886276 | BBA_03264 | 1.29 | 7.66E-10 | 4.39E-09 | up | NADH:ubiquinone oxidoreductase 6.6kD subunit           |
| 19892227 | BBA_09215 | 1.29 | 1.86E-16 | 1.69E-15 | up | hypothetical protein BBA_09215                         |
| 19891599 | BBA_08587 | 1.30 | 4.87E-09 | 2.60E-08 | up | hypothetical protein BBA_08587                         |
| 19883563 | BBA_00551 | 1.30 | 4.31E-24 | 5.72E-23 | up | major facilitator superfamily transporter              |
| 19886661 | BBA_03649 | 1.30 | 2.87E-09 | 1.56E-08 | up | glucose-repressible protein                            |
| 19885376 | BBA_02364 | 1.30 | 1.09E-23 | 1.41E-22 | up | DJ-1/PfpI family protein                               |
| 19888752 | BBA_05740 | 1.30 | 1.11E-10 | 6.81E-10 | up | major facilitator superfamily transporter              |
| 19891772 | BBA_08760 | 1.30 | 1.01E-15 | 8.86E-15 | up | OsmC-like protein                                      |
| 19890511 | BBA_07499 | 1.30 | 8.31E-05 | 2.47E-04 | up | hypothetical protein BBA_07499                         |
| 19883059 | BBA_00047 | 1.31 | 4.08E-23 | 5.18E-22 | up | Cel5b-like protein                                     |
| 19891686 | BBA_08674 | 1.31 | 5.87E-06 | 2.11E-05 | up | hypothetical protein BBA_08674                         |
| 19890914 | BBA_07902 | 1.31 | 3.50E-14 | 2.80E-13 | up | sterol desaturase                                      |
| 19885802 | BBA_02790 | 1.31 | 1.66E-22 | 2.05E-21 | up | hypothetical protein BBA_02790                         |
| 19892756 | BBA_09744 | 1.31 | 7.21E-10 | 4.14E-09 | up | O-methyltransferase-like protein                       |
| 19883456 | BBA_00444 | 1.31 | 1.86E-25 | 2.63E-24 | up | nucleoside transporter, putative                       |
| 19890793 | BBA_07781 | 1.32 | 3.47E-22 | 4.23E-21 | up | F-box and wd40 domain protein                          |
| 19889610 | BBA_06598 | 1.32 | 1.63E-08 | 8.22E-08 | up | histidine acid phosphatase                             |
| 19891183 | BBA_08171 | 1.32 | 3.29E-28 | 5.10E-27 | up | adenylosuccinate synthetase                            |
| 19892677 | BBA_09665 | 1.32 | 1.36E-10 | 8.27E-10 | up | hypothetical protein BBA_09665                         |
| 19890955 | BBA_07943 | 1.32 | 1.23E-29 | 1.98E-28 | up | glycerophosphoryl diester phosphodiesterase            |
| 19889595 | BBA_06583 | 1.32 | 1.76E-07 | 7.84E-07 | up | hypothetical protein BBA_06583                         |
| 19883651 | BBA_00639 | 1.32 | 9.16E-13 | 6.59E-12 | up | hypothetical protein BBA_00639                         |
| 19887391 | BBA_04379 | 1.32 | 8.36E-23 | 1.05E-21 | up | proline-rich protein                                   |
| 19883295 | BBA_00283 | 1.32 | 3.76E-07 | 1.60E-06 | up | membrane transporter                                   |
| 19893079 | BBA_10067 | 1.33 | 4.36E-08 | 2.08E-07 | up | DSBA-like thioredoxin domain protein                   |
| 19886687 | BBA_03675 | 1.33 | 6.58E-17 | 6.15E-16 | up | NAD dependent epimerase/dehydratase                    |
| 19888805 | BBA_05793 | 1.33 | 1.80E-09 | 9.97E-09 | up | hypothetical protein BBA_05793                         |
| 19886708 | BBA_03696 | 1.33 | 1.30E-18 | 1.33E-17 | up | hypothetical protein BBA_03696                         |

|          |           |      |          |          |    |                                                          |
|----------|-----------|------|----------|----------|----|----------------------------------------------------------|
| 19892383 | BBA_09371 | 1.33 | 4.64E-06 | 1.70E-05 | up | hypothetical protein BBA_09371                           |
| 19890727 | BBA_07715 | 1.34 | 2.29E-13 | 1.73E-12 | up | major facilitator superfamily transporter                |
| 19891740 | BBA_08728 | 1.34 | 1.05E-19 | 1.15E-18 | up | hexose transporter                                       |
| 19889771 | BBA_06759 | 1.34 | 1.39E-06 | 5.51E-06 | up | hypothetical protein BBA_06759                           |
| 19892218 | BBA_09206 | 1.34 | 5.55E-11 | 3.52E-10 | up | SNARE domain-containing protein                          |
| 19888816 | BBA_05804 | 1.34 | 7.96E-11 | 4.97E-10 | up | hypothetical protein BBA_05804                           |
| 19883450 | BBA_00438 | 1.35 | 3.43E-10 | 2.03E-09 | up | GNAT family acetyltransferase, putative                  |
| 19891051 | BBA_08039 | 1.35 | 1.04E-10 | 6.41E-10 | up | shwachman-Bodian-Diamond syndrome protein                |
| 19887026 | BBA_04014 | 1.35 | 1.42E-11 | 9.45E-11 | up | inositol phospholipid synthesis protein Scs3p            |
| 19889560 | BBA_06548 | 1.35 | 5.10E-29 | 8.08E-28 | up | transient receptor potential (TRP) ion channel           |
| 19887502 | BBA_04490 | 1.35 | 8.39E-21 | 9.65E-20 | up | hypothetical protein BBA_04490                           |
| 19889364 | BBA_06352 | 1.35 | 1.65E-04 | 4.66E-04 | up | glycoside hydrolase family 76                            |
| 19889141 | BBA_06129 | 1.35 | 6.63E-12 | 4.49E-11 | up | hypothetical protein BBA_06129                           |
| 19891437 | BBA_08425 | 1.36 | 2.03E-22 | 2.50E-21 | up | Cytochrome P450 CYP5262A3                                |
| 19891667 | BBA_08655 | 1.36 | 4.22E-07 | 1.79E-06 | up | hypothetical protein BBA_08655                           |
| 19892265 | BBA_09253 | 1.36 | 1.92E-20 | 2.16E-19 | up | XFP domain-containing protein MPK1                       |
| 19890072 | BBA_07060 | 1.37 | 2.12E-08 | 1.05E-07 | up | hypothetical protein BBA_07060                           |
| 19887176 | BBA_04164 | 1.37 | 7.02E-08 | 3.27E-07 | up | phosphorylcholine phosphatase                            |
| 19885763 | BBA_02751 | 1.37 | 4.33E-07 | 1.83E-06 | up | Cytochrome P450 CYP5282A1                                |
| 19891980 | BBA_08968 | 1.37 | 2.71E-24 | 3.63E-23 | up | hypothetical protein BBA_08968                           |
| 19883631 | BBA_00619 | 1.37 | 4.38E-18 | 4.35E-17 | up | intracellular serine protease                            |
| 19892267 | BBA_09255 | 1.38 | 1.07E-20 | 1.22E-19 | up | acetate kinase                                           |
| 19883543 | BBA_00531 | 1.38 | 3.71E-14 | 2.95E-13 | up | hypothetical protein BBA_00531                           |
| 19884873 | BBA_01861 | 1.38 | 2.38E-27 | 3.59E-26 | up | hypothetical protein BBA_01861                           |
| 19886726 | BBA_03714 | 1.38 | 1.51E-13 | 1.16E-12 | up | ricin-type beta-trefoil lectin domain-containing protein |
| 19886077 | BBA_03065 | 1.38 | 2.98E-17 | 2.83E-16 | up | GliK protein                                             |
| 19891501 | BBA_08489 | 1.39 | 3.51E-14 | 2.80E-13 | up | DJ-1/PfpI family protein                                 |
| 19887135 | BBA_04123 | 1.39 | 3.73E-21 | 4.36E-20 | up | NmrA-like family protein                                 |
| 19893290 | BBA_10278 | 1.39 | 8.81E-09 | 4.56E-08 | up | hypothetical protein BBA_10278                           |
| 19892487 | BBA_09475 | 1.40 | 8.10E-05 | 2.42E-04 | up | hypothetical protein BBA_09475                           |
| 19885173 | BBA_02161 | 1.40 | 5.19E-25 | 7.26E-24 | up | hypothetical protein BBA_02161                           |
| 19883774 | BBA_00762 | 1.40 | 5.85E-10 | 3.40E-09 | up | hypothetical protein BBA_00762                           |
| 19887048 | BBA_04036 | 1.40 | 3.83E-11 | 2.46E-10 | up | NmrA-like family protein                                 |
| 19887166 | BBA_04154 | 1.40 | 1.16E-22 | 1.44E-21 | up | hypothetical protein BBA_04154                           |
| 19885788 | BBA_02776 | 1.41 | 5.69E-30 | 9.37E-29 | up | choline transport protein                                |
| 19892636 | BBA_09624 | 1.41 | 1.91E-14 | 1.56E-13 | up | hypothetical protein BBA_09624                           |
| 19884691 | BBA_01679 | 1.41 | 4.02E-04 | 1.06E-03 | up | hypothetical protein BBA_01679                           |
| 19886325 | BBA_03313 | 1.41 | 3.53E-06 | 1.32E-05 | up | hypothetical protein BBA_03313                           |
| 19884490 | BBA_01478 | 1.41 | 5.73E-34 | 1.07E-32 | up | hydantoinase B/oxoprolinase                              |
| 19890161 | BBA_07149 | 1.41 | 2.47E-08 | 1.22E-07 | up | major facilitator superfamily transporter                |
| 19892016 | BBA_09004 | 1.41 | 7.49E-22 | 8.99E-21 | up | Putative C2H2 finger domain transcription factor         |
| 19892203 | BBA_09191 | 1.41 | 1.46E-10 | 8.88E-10 | up | MIP transporter                                          |
| 19891012 | BBA_08000 | 1.42 | 3.82E-23 | 4.86E-22 | up | enoyl-CoA hydratase/isomerase                            |
| 19893237 | BBA_10225 | 1.42 | 5.27E-20 | 5.80E-19 | up | C6 finger domain protein, putative                       |
| 19889152 | BBA_06140 | 1.42 | 8.36E-09 | 4.34E-08 | up | hypothetical protein BBA_06140                           |
| 19889648 | BBA_06636 | 1.43 | 1.51E-08 | 7.62E-08 | up | hypothetical protein BBA_06636                           |
| 19889654 | BBA_06642 | 1.43 | 7.36E-06 | 2.60E-05 | up | hypothetical protein BBA_06642                           |
| 19884790 | BBA_01778 | 1.43 | 6.34E-08 | 2.96E-07 | up | hypothetical protein BBA_01778                           |
| 19893359 | BBA_10347 | 1.43 | 2.38E-32 | 4.27E-31 | up | FAD binding domain-containing protein                    |
| 19883630 | BBA_00618 | 1.43 | 2.74E-12 | 1.89E-11 | up | Hemolysin-III protein                                    |
| 19887407 | BBA_04395 | 1.44 | 2.90E-24 | 3.88E-23 | up | hypothetical protein BBA_04395                           |
| 19883699 | BBA_00687 | 1.44 | 2.62E-17 | 2.50E-16 | up | hypothetical protein BBA_00687                           |
| 19893153 | BBA_10141 | 1.45 | 7.36E-08 | 3.42E-07 | up | hypothetical protein BBA_10141                           |
| 19885123 | BBA_02111 | 1.45 | 1.22E-22 | 1.52E-21 | up | NAD dependent epimerase/dehydratase                      |
| 19891061 | BBA_08049 | 1.46 | 2.20E-14 | 1.80E-13 | up | VMA21-like domain-containing protein                     |
| 19887847 | BBA_04835 | 1.46 | 2.09E-12 | 1.46E-11 | up | hypothetical protein BBA_04835                           |
| 19892173 | BBA_09161 | 1.46 | 1.72E-12 | 1.21E-11 | up | NACHT and WD domain protein                              |
| 19893226 | BBA_10214 | 1.46 | 1.79E-18 | 1.82E-17 | up | hypothetical protein BBA_10214                           |
| 19886415 | BBA_03403 | 1.46 | 5.19E-08 | 2.46E-07 | up | thioredoxin-like protein                                 |
| 19889774 | BBA_06762 | 1.46 | 4.81E-26 | 6.94E-25 | up | ctr copper transporter                                   |
| 19891438 | BBA_08426 | 1.46 | 1.11E-24 | 1.52E-23 | up | aspartate aminotransferase, putative                     |

|          |           |      |          |          |    |                                                        |
|----------|-----------|------|----------|----------|----|--------------------------------------------------------|
| 19886122 | BBA_03110 | 1.47 | 9.55E-18 | 9.35E-17 | up | OPT oligopeptide transporter                           |
| 19884006 | BBA_00994 | 1.47 | 3.15E-25 | 4.41E-24 | up | membrane protein-like protein                          |
| 19890430 | BBA_07418 | 1.47 | 1.50E-04 | 4.26E-04 | up | fungus specific transcription factor                   |
| 19891188 | BBA_08176 | 1.47 | 4.85E-11 | 3.09E-10 | up | mitochondrial CorA family metal ion transporter        |
| 19885925 | BBA_02913 | 1.47 | 8.02E-24 | 1.05E-22 | up | methyltransferase domain-containing protein            |
| 19889032 | BBA_06020 | 1.48 | 5.54E-19 | 5.77E-18 | up | hypothetical protein BBA_06020                         |
| 19892027 | BBA_09015 | 1.48 | 2.48E-04 | 6.80E-04 | up | lipase/esterase, putative                              |
| 19888996 | BBA_05984 | 1.48 | 3.54E-26 | 5.14E-25 | up | pH regulatory protein                                  |
| 19888679 | BBA_05667 | 1.48 | 2.69E-07 | 1.16E-06 | up | hypothetical protein BBA_05667                         |
| 19893366 | BBA_10354 | 1.48 | 2.39E-14 | 1.94E-13 | up | gag protein                                            |
| 19887290 | BBA_04278 | 1.48 | 4.30E-14 | 3.39E-13 | up | pyridine nucleotide-disulfide oxidoreductase, putative |
| 19885773 | BBA_02761 | 1.48 | 7.52E-29 | 1.18E-27 | up |                                                        |
| 19885971 | BBA_02959 | 1.49 | 1.40E-14 | 1.15E-13 | up | hypothetical protein BBA_02959                         |
| 19886591 | BBA_03579 | 1.49 | 5.85E-36 | 1.18E-34 | up | putative apoptosis-inducing factor (AIF)               |
| 19884909 | BBA_01897 | 1.49 | 6.98E-06 | 2.48E-05 | up | anthranilate synthase component II                     |
| 19886303 | BBA_03291 | 1.49 | 7.13E-36 | 1.44E-34 | up | MFS monocarboxylate transporter                        |
| 19892013 | BBA_09001 | 1.49 | 5.75E-08 | 2.70E-07 | up | prenyltransferase, UbiA family protein                 |
| 19890951 | BBA_07939 | 1.49 | 4.82E-19 | 5.04E-18 | up | flavin-binding monooxygenase, putative                 |
| 19888519 | BBA_05507 | 1.49 | 2.53E-14 | 2.05E-13 | up | hypothetical protein BBA_05507                         |
| 19883734 | BBA_00722 | 1.49 | 4.60E-12 | 3.14E-11 | up | Cytochrome P450 CYP645A1                               |
| 19886241 | BBA_03229 | 1.49 | 5.61E-13 | 4.12E-12 | up | hypothetical protein BBA_03229                         |
| 19884293 | BBA_01281 | 1.50 | 4.76E-29 | 7.55E-28 | up | hypothetical protein BBA_01281                         |
| 19884713 | BBA_01701 | 1.50 | 2.98E-22 | 3.65E-21 | up | C6 finger domain protein                               |
| 19888780 | BBA_05768 | 1.50 | 2.55E-25 | 3.60E-24 | up | cysteine synthase                                      |
| 19888100 | BBA_05088 | 1.50 | 1.87E-19 | 2.01E-18 | up | cutinase-like protein                                  |
| 19892181 | BBA_09169 | 1.50 | 1.32E-34 | 2.53E-33 | up | Hexose transport-related protein, putative             |
| 19892918 | BBA_09906 | 1.51 | 3.27E-28 | 5.09E-27 | up | hypothetical protein BBA_09906                         |
| 19889163 | BBA_06151 | 1.51 | 2.43E-16 | 2.20E-15 | up | ferric reductase like transmembrane component          |
| 19887601 | BBA_04589 | 1.51 | 3.17E-13 | 2.36E-12 | up | DUF866 domain-containing protein                       |
| 19890133 | BBA_07121 | 1.51 | 3.77E-10 | 2.23E-09 | up | Pfs, NACHT and Ankyrin domain protein                  |
| 19892972 | BBA_09960 | 1.52 | 7.14E-19 | 7.39E-18 | up | Rho-associated protein kinase, putative                |
| 19892610 | BBA_09598 | 1.52 | 1.01E-11 | 6.80E-11 | up |                                                        |
| 19890791 | BBA_07779 | 1.52 | 2.81E-14 | 2.27E-13 | up | serine-threonine protein kinase                        |
| 19890962 | BBA_07950 | 1.52 | 1.64E-09 | 9.14E-09 | up | hypothetical protein BBA_07950                         |
| 19885303 | BBA_02291 | 1.52 | 2.80E-07 | 1.21E-06 | up | V-type ATPase                                          |
| 19892132 | BBA_09120 | 1.52 | 2.42E-18 | 2.44E-17 | up | hydrolase-like protein                                 |
| 19892445 | BBA_09433 | 1.53 | 4.13E-38 | 8.86E-37 | up | hypothetical protein BBA_09433                         |
| 19884766 | BBA_01754 | 1.53 | 2.08E-13 | 1.58E-12 | up | DUF636 domain-containing protein                       |
| 19893002 | BBA_09990 | 1.54 | 7.98E-14 | 6.19E-13 | up | dipeptidyl aminopeptidase/acylaminoacyl peptidase      |
| 19891742 | BBA_08730 | 1.54 | 3.06E-30 | 5.10E-29 | up | hypothetical protein BBA_08730                         |
| 19891579 | BBA_08567 | 1.54 | 4.57E-23 | 5.78E-22 | up | methyltransferase domain-containing protein            |
| 19889064 | BBA_06052 | 1.55 | 9.20E-16 | 8.08E-15 | up | cyclase protein                                        |
| 19887975 | BBA_04963 | 1.55 | 9.88E-09 | 5.08E-08 | up | hypothetical protein BBA_04963                         |
| 19885707 | BBA_02695 | 1.55 | 1.71E-15 | 1.48E-14 | up | short chain dehydrogenase                              |
| 19888129 | BBA_05117 | 1.55 | 2.66E-07 | 1.15E-06 | up | SET domain-containing protein                          |
| 19889411 | BBA_06399 | 1.55 | 1.27E-20 | 1.45E-19 | up | neutral/alkaline non-lysosomal ceramidase              |
| 19887040 | BBA_04028 | 1.56 | 1.10E-19 | 1.19E-18 | up | nonribosomal peptide synthetase 10                     |
| 19892510 | BBA_09498 | 1.56 | 5.59E-08 | 2.64E-07 | up | FkbM family methyltransferase                          |
| 19887183 | BBA_04171 | 1.56 | 7.71E-35 | 1.50E-33 | up | hypothetical protein BBA_04171                         |
| 19889128 | BBA_06116 | 1.57 | 4.76E-37 | 9.93E-36 | up | CAP22 protein                                          |
| 19883068 | BBA_00056 | 1.57 | 2.04E-06 | 7.88E-06 | up | hypothetical protein BBA_00056                         |
| 19891439 | BBA_08427 | 1.57 | 1.45E-34 | 2.77E-33 | up | fatty acid hydroxylase superfamily protein             |
| 19885670 | BBA_02658 | 1.57 | 2.65E-11 | 1.73E-10 | up | hypothetical protein BBA_02658                         |
| 19890295 | BBA_07283 | 1.58 | 1.80E-26 | 2.64E-25 | up |                                                        |
| 19885502 | BBA_02490 | 1.58 | 1.15E-15 | 1.01E-14 | up | FAD dependent oxidoreductase                           |
| 19888260 | BBA_05248 | 1.58 | 1.47E-15 | 1.28E-14 | up | GPR1/FUN34/YaaH-class plasma membrane protein          |
| 19886063 | BBA_03051 | 1.58 | 9.54E-17 | 8.85E-16 | up | polyamine transporter 3                                |
| 19892040 | BBA_09028 | 1.59 | 3.71E-14 | 2.95E-13 | up | Pfs, NACHT and Ankyrin domain protein                  |
| 19887177 | BBA_04165 | 1.59 | 7.95E-23 | 1.00E-21 | up | toxT-like zinc binding oxidoreductase                  |
| 19891421 | BBA_08409 | 1.60 | 7.78E-07 | 3.18E-06 | up | hypothetical protein BBA_08409                         |
| 19883502 | BBA_00490 | 1.60 | 3.92E-11 | 2.51E-10 | up | DASH complex subunit Dad4                              |

|          |           |      |          |          |    |                                                      |
|----------|-----------|------|----------|----------|----|------------------------------------------------------|
| 19890862 | BBA_07850 | 1.60 | 1.04E-30 | 1.75E-29 | up | hypothetical protein BBA_07850                       |
| 19889372 | BBA_06360 | 1.60 | 6.54E-12 | 4.43E-11 | up | Succinyl-CoA synthetase, beta subunit                |
| 19891873 | BBA_08861 | 1.60 | 1.55E-30 | 2.61E-29 | up | hypothetical protein BBA_08861                       |
| 19887860 | BBA_04848 | 1.61 | 5.55E-27 | 8.26E-26 | up | Alpha/beta hydrolase fold-3 domain protein           |
| 19886046 | BBA_03034 | 1.61 | 1.82E-06 | 7.09E-06 | up | hypothetical protein BBA_03034                       |
| 19888028 | BBA_05016 | 1.61 | 1.10E-03 | 2.67E-03 | up | integral membrane protein pth11                      |
| 19893020 | BBA_10008 | 1.61 | 2.62E-12 | 1.81E-11 | up | hypothetical protein BBA_10008                       |
| 19887700 | BBA_04688 | 1.62 | 3.84E-30 | 6.35E-29 | up | glycosyl hydrolase family 76                         |
| 19893229 | BBA_10217 | 1.62 | 3.02E-34 | 5.67E-33 | up | hypothetical protein BBA_10217                       |
| 19885836 | BBA_02824 | 1.62 | 1.21E-07 | 5.51E-07 | up | short chain dehydrogenase                            |
| 19892731 | BBA_09719 | 1.62 | 1.25E-27 | 1.91E-26 | up | MFS toxin efflux pump (AflT)                         |
| 19889548 | BBA_06536 | 1.63 | 4.03E-39 | 9.07E-38 | up | carboxylic acid transport protein                    |
| 19890946 | BBA_07934 | 1.63 | 9.86E-16 | 8.64E-15 | up | secretory lipase                                     |
| 19884343 | BBA_01331 | 1.63 | 1.38E-26 | 2.04E-25 | up | helix-turn-helix domain-containing protein           |
| 19889182 | BBA_06170 | 1.64 | 9.80E-13 | 7.03E-12 | up | Cry3Aa protein                                       |
| 19890397 | BBA_07385 | 1.64 | 1.46E-38 | 3.19E-37 | up | MFS transporter                                      |
| 19892002 | BBA_08990 | 1.64 | 2.90E-35 | 5.74E-34 | up | pyruvate decarboxylase                               |
| 19884920 | BBA_01908 | 1.64 | 3.52E-13 | 2.62E-12 | up | hypothetical protein BBA_01908                       |
| 19893336 | BBA_10324 | 1.64 | 1.26E-09 | 7.11E-09 | up | metalloreductase transmembrane component             |
| 19892723 | BBA_09711 | 1.65 | 2.77E-37 | 5.81E-36 | up | sphingolipid long chain base-responsive protein LSP1 |
| 19888305 | BBA_05293 | 1.65 | 8.19E-03 | 1.64E-02 | up | hypothetical protein BBA_05293                       |
| 19883459 | BBA_00447 | 1.65 | 7.76E-21 | 8.96E-20 | up |                                                      |
| 19883955 | BBA_00943 | 1.65 | 6.31E-25 | 8.78E-24 | up | hypothetical protein BBA_00943                       |
| 19886021 | BBA_03009 | 1.65 | 8.89E-35 | 1.73E-33 | up |                                                      |
| 19889229 | BBA_06217 | 1.66 | 4.02E-19 | 4.23E-18 | up | quinone oxidoreductase                               |
| 19883105 | BBA_00093 | 1.66 | 1.69E-09 | 9.43E-09 | up | methyltransferase domain-containing protein          |
| 19886245 | BBA_03233 | 1.66 | 3.29E-28 | 5.10E-27 | up | GDP-mannose transporter                              |
| 19892949 | BBA_09937 | 1.66 | 6.31E-06 | 2.26E-05 | up | hypothetical protein BBA_09937                       |
| 19887620 | BBA_04608 | 1.67 | 9.06E-10 | 5.16E-09 | up | hypothetical protein BBA_04608                       |
| 19892758 | BBA_09746 | 1.67 | 1.64E-08 | 8.24E-08 | up | major facilitator superfamily transporter            |
| 19891946 | BBA_08934 | 1.67 | 1.93E-27 | 2.92E-26 | up | proline dehydrogenase                                |
| 19889019 | BBA_06007 | 1.67 | 1.10E-27 | 1.68E-26 | up | short-chain dehydrogenase                            |
| 19886432 | BBA_03420 | 1.67 | 1.30E-09 | 7.32E-09 | up | hypothetical protein BBA_03420                       |
| 19887068 | BBA_04056 | 1.67 | 1.68E-16 | 1.54E-15 | up | SpoVR like family protein                            |
| 19890118 | BBA_07106 | 1.68 | 6.53E-40 | 1.49E-38 | up | CoA-transferase family III                           |
| 19884859 | BBA_01847 | 1.68 | 4.24E-19 | 4.46E-18 | up | hypothetical protein BBA_01847                       |
| 19889362 | BBA_06350 | 1.68 | 3.98E-18 | 3.96E-17 | up | C6 transcription factor                              |
| 19886958 | BBA_03946 | 1.68 | 6.09E-29 | 9.61E-28 | up | glycosyl hydrolase family 2                          |
| 19884115 | BBA_01103 | 1.68 | 3.05E-16 | 2.74E-15 | up | ABC transporter                                      |
| 19886594 | BBA_03582 | 1.68 | 3.20E-41 | 7.52E-40 | up | O-methyltransferase family protein                   |
| 19892435 | BBA_09423 | 1.69 | 7.75E-09 | 4.05E-08 | up | translation factor (SUA5)                            |
| 19886885 | BBA_03873 | 1.69 | 1.22E-31 | 2.13E-30 | up | calcium/proton exchanger                             |
| 19884569 | BBA_01557 | 1.69 | 1.33E-34 | 2.54E-33 | up | choline-sulfatase-like protein                       |
| 19886094 | BBA_03082 | 1.69 | 1.88E-18 | 1.90E-17 | up | beta (1-3) glucanosyltransferase                     |
| 19887151 | BBA_04139 | 1.70 | 8.08E-44 | 2.03E-42 | up | glutamate 5-kinase                                   |
| 19891741 | BBA_08729 | 1.70 | 8.89E-30 | 1.45E-28 | up | phosphatidylserine decarboxylase family protein      |
| 19893146 | BBA_10134 | 1.70 | 2.28E-44 | 5.83E-43 | up | fatty acid hydroxylase superfamily protein           |
| 19893300 | BBA_10288 | 1.70 | 9.48E-20 | 1.04E-18 | up | hypothetical protein BBA_10288                       |
| 19883457 | BBA_00445 | 1.72 | 3.82E-26 | 5.53E-25 | up | hypothetical protein BBA_00445                       |
| 19886195 | BBA_03183 | 1.73 | 2.08E-12 | 1.46E-11 | up | hypothetical protein BBA_03183                       |
| 19889388 | BBA_06376 | 1.74 | 2.92E-41 | 6.92E-40 | up | glycine-rich cell wall structural protein 1          |
| 19888319 | BBA_05307 | 1.74 | 1.50E-17 | 1.45E-16 | up | hypothetical protein BBA_05307                       |
| 19885793 | BBA_02781 | 1.75 | 1.96E-22 | 2.42E-21 | up | WSC domain-containing protein                        |
| 19888735 | BBA_05723 | 1.75 | 2.85E-16 | 2.56E-15 | up | fructosamine-3-kinase                                |
| 19890660 | BBA_07648 | 1.75 | 6.64E-44 | 1.67E-42 | up |                                                      |
| 19883649 | BBA_00637 | 1.76 | 5.12E-36 | 1.04E-34 | up | epoxide hydrolase                                    |
| 19890768 | BBA_07756 | 1.76 | 2.90E-33 | 5.33E-32 | up | prolyl oligopeptidase                                |
| 19886473 | BBA_03461 | 1.76 | 8.68E-31 | 1.47E-29 | up | fatty acid desaturase                                |
| 19887349 | BBA_04337 | 1.77 | 2.53E-08 | 1.24E-07 | up | hypothetical protein BBA_04337                       |
| 19883584 | BBA_00572 | 1.78 | 5.09E-19 | 5.31E-18 | up | glyoxalase/bleomycin resistance protein/dioxygenase  |
| 19891445 | BBA_08433 | 1.79 | 3.81E-09 | 2.06E-08 | up | quercetin 2,3-dioxygenase                            |

|          |           |      |          |          |    |                                                         |
|----------|-----------|------|----------|----------|----|---------------------------------------------------------|
| 19886031 | BBA_03019 | 1.79 | 2.73E-06 | 1.04E-05 | up | hypothetical protein BBA_03019                          |
| 19887335 | BBA_04323 | 1.79 | 1.77E-46 | 4.70E-45 | up | DUF1445 domain-containing protein                       |
| 19890352 | BBA_07340 | 1.80 | 7.47E-22 | 8.98E-21 | up | monocarboxylate permease-like protein                   |
| 19890293 | BBA_07281 | 1.80 | 2.67E-17 | 2.54E-16 | up | urea active transporter                                 |
| 19885974 | BBA_02962 | 1.80 | 2.43E-16 | 2.20E-15 | up | hypothetical protein BBA_02962                          |
| 19884843 | BBA_01831 | 1.80 | 1.12E-07 | 5.12E-07 | up | hypothetical protein BBA_01831                          |
| 19892086 | BBA_09074 | 1.81 | 1.81E-26 | 2.65E-25 | up | mitochondrial chaperone BCS1                            |
| 19889423 | BBA_06411 | 1.81 | 1.84E-41 | 4.40E-40 | up | Gti1/Pac2 family protein                                |
| 19891042 | BBA_08030 | 1.81 | 3.27E-24 | 4.37E-23 | up | hypothetical protein BBA_08030                          |
| 19888768 | BBA_05756 | 1.81 | 1.78E-37 | 3.78E-36 | up | cell wall serine-threonine-rich galactomannoprotein Mp1 |
| 19891661 | BBA_08649 | 1.81 | 1.53E-07 | 6.86E-07 | up | hypothetical protein BBA_08649                          |
| 19885562 | BBA_02550 | 1.81 | 2.02E-24 | 2.74E-23 | up | atmA protein                                            |
| 19889421 | BBA_06409 | 1.82 | 3.45E-31 | 5.91E-30 | up | flavin-containing amine oxidasedehydrogenase            |
| 19890609 | BBA_07597 | 1.82 | 1.00E-38 | 2.21E-37 | up | hypothetical protein BBA_07597                          |
| 19891417 | BBA_08405 | 1.82 | 2.76E-10 | 1.64E-09 | up | hypothetical protein BBA_08405                          |
| 19883806 | BBA_00794 | 1.82 | 5.89E-21 | 6.84E-20 | up | hypothetical protein BBA_00794                          |
| 19885591 | BBA_02579 | 1.83 | 1.02E-47 | 2.83E-46 | up | beta-glucuronidase                                      |
| 19890508 | BBA_07496 | 1.84 | 1.29E-09 | 7.26E-09 | up | hypothetical protein BBA_07496                          |
| 19892611 | BBA_09599 | 1.84 | 5.73E-46 | 1.50E-44 | up |                                                         |
| 19883781 | BBA_00769 | 1.84 | 4.14E-49 | 1.19E-47 | up | hypothetical protein BBA_00769                          |
| 19885056 | BBA_02044 | 1.85 | 8.37E-41 | 1.95E-39 | up | integral membrane protein, putative                     |
| 19887275 | BBA_04263 | 1.85 | 1.76E-44 | 4.52E-43 | up | Bys1 family protein                                     |
| 19885052 | BBA_02040 | 1.85 | 3.73E-07 | 1.59E-06 | up | hypothetical protein BBA_02040                          |
| 19887307 | BBA_04295 | 1.85 | 1.15E-38 | 2.53E-37 | up | C2 domain-containing protein                            |
| 19883122 | BBA_00110 | 1.86 | 1.13E-18 | 1.16E-17 | up | hypothetical protein BBA_00110                          |
| 19887280 | BBA_04268 | 1.86 | 1.63E-10 | 9.88E-10 | up | hypothetical protein BBA_04268                          |
| 19889621 | BBA_06609 | 1.86 | 3.20E-20 | 3.56E-19 | up | myosin-cross-reactive antigen                           |
| 19884917 | BBA_01905 | 1.87 | 1.40E-25 | 1.99E-24 | up | UPF0643 protein                                         |
| 19893225 | BBA_10213 | 1.87 | 3.82E-20 | 4.25E-19 | up | platelet-activating factor acetylhydrolase              |
| 19891773 | BBA_08761 | 1.88 | 1.09E-08 | 5.58E-08 | up | hypothetical protein BBA_08761                          |
| 19890235 | BBA_07223 | 1.88 | 7.02E-10 | 4.03E-09 | up | hypothetical protein BBA_07223                          |
| 19883559 | BBA_00547 | 1.88 | 3.55E-15 | 3.03E-14 | up | purine nucleoside permease                              |
| 19883310 | BBA_00298 | 1.88 | 7.12E-38 | 1.52E-36 | up | putative U-snRNP-associated cyclophilin                 |
| 19887045 | BBA_04033 | 1.88 | 6.92E-26 | 9.91E-25 | up | General substrate transporter                           |
| 19889705 | BBA_06693 | 1.90 | 9.92E-43 | 2.45E-41 | up | hypothetical protein BBA_06693                          |
| 19885901 | BBA_02889 | 1.90 | 1.24E-34 | 2.39E-33 | up | hypothetical protein BBA_02889                          |
| 19891014 | BBA_08002 | 1.90 | 1.94E-10 | 1.17E-09 | up | L-PSP endoribonuclease family protein                   |
| 19892876 | BBA_09864 | 1.90 | 2.32E-41 | 5.51E-40 | up | phenol acid carboxylase, putative                       |
| 19893227 | BBA_10215 | 1.90 | 1.15E-18 | 1.17E-17 | up | hypothetical protein BBA_10215                          |
| 19892512 | BBA_09500 | 1.91 | 2.60E-08 | 1.28E-07 | up | cuticle-degrading serine protease                       |
| 19890510 | BBA_07498 | 1.92 | 7.04E-09 | 3.69E-08 | up | fatty acid-binding protein                              |
| 19888890 | BBA_05878 | 1.92 | 1.32E-19 | 1.43E-18 | up | metal dependent phosphohydrolase                        |
| 19892719 | BBA_09707 | 1.93 | 2.16E-51 | 6.55E-50 | up | hypothetical protein BBA_09707                          |
| 19886959 | BBA_03947 | 1.93 | 1.83E-24 | 2.50E-23 | up | hypothetical protein BBA_03947                          |
| 19890538 | BBA_07526 | 1.94 | 4.09E-50 | 1.20E-48 | up | protein rds1                                            |
| 19890008 | BBA_06996 | 1.94 | 1.27E-17 | 1.23E-16 | up | AMP-binding enzyme                                      |
| 19891837 | BBA_08825 | 1.96 | 7.70E-30 | 1.26E-28 | up | hypothetical protein BBA_08825                          |
| 19888364 | BBA_05352 | 1.96 | 6.37E-42 | 1.54E-40 | up | hypothetical protein BBA_05352                          |
| 19888417 | BBA_05405 | 1.97 | 8.65E-13 | 6.25E-12 | up | hypothetical protein BBA_05405                          |
| 19888268 | BBA_05256 | 1.98 | 1.23E-07 | 5.58E-07 | up | nucleoside-diphosphate-sugar epimerase, putative        |
| 19883777 | BBA_00765 | 1.99 | 8.75E-25 | 1.20E-23 | up | NADPH oxidase                                           |
| 19891187 | BBA_08175 | 2.00 | 1.55E-08 | 7.85E-08 | up | evolved D-lactonohydrolase                              |
| 19891189 | BBA_08177 | 2.01 | 1.05E-20 | 1.20E-19 | up | cation transporter                                      |
| 19889495 | BBA_06483 | 2.01 | 8.09E-25 | 1.12E-23 | up | Lactamase B                                             |
| 19886090 | BBA_03078 | 2.02 | 7.31E-45 | 1.90E-43 | up | Cytochrome P450 CYP68N1                                 |
| 19892499 | BBA_09487 | 2.02 | 3.69E-31 | 6.32E-30 | up | hypothetical protein BBA_09487                          |
| 19887733 | BBA_04721 | 2.03 | 4.43E-20 | 4.91E-19 | up | serine protein kinase                                   |
| 19888178 | BBA_05166 | 2.03 | 1.01E-23 | 1.32E-22 | up |                                                         |
| 19890132 | BBA_07120 | 2.06 | 4.05E-45 | 1.06E-43 | up | major facilitator superfamily transporter               |
| 19890021 | BBA_07009 | 2.06 | 2.17E-47 | 5.95E-46 | up | alkaline foam protein B precursor                       |
| 19890795 | BBA_07783 | 2.06 | 2.95E-18 | 2.97E-17 | up | CFEM domain-containing protein                          |

|          |           |      |          |          |    |                                                      |
|----------|-----------|------|----------|----------|----|------------------------------------------------------|
| 19889844 | BBA_06832 | 2.06 | 4.59E-47 | 1.25E-45 | up | fatty acid hydroxylase superfamily protein           |
| 19891776 | BBA_08764 | 2.07 | 6.80E-37 | 1.41E-35 | up | hypothetical protein BBA_08764                       |
| 19887618 | BBA_04606 | 2.07 | 6.52E-09 | 3.43E-08 | up | hypothetical protein BBA_04606                       |
| 19888701 | BBA_05689 | 2.07 | 4.46E-23 | 5.66E-22 | up | extracellular dioxygenase                            |
| 19885131 | BBA_02119 | 2.07 | 2.96E-25 | 4.15E-24 | up | X-Pro dipeptidyl-peptidase (S15 family) protein      |
| 19889712 | BBA_06700 | 2.08 | 3.57E-09 | 1.93E-08 | up | alkaline serine protease AorO                        |
| 19892054 | BBA_09042 | 2.08 | 4.78E-47 | 1.30E-45 | up | hypothetical protein BBA_09042                       |
| 19889500 | BBA_06488 | 2.09 | 1.07E-19 | 1.16E-18 | up | hypothetical protein BBA_06488                       |
| 19883297 | BBA_00285 | 2.11 | 1.88E-17 | 1.80E-16 | up | transmembrane protein                                |
| 19891696 | BBA_08684 | 2.12 | 9.75E-10 | 5.54E-09 | up | fatty acid desaturase                                |
| 19891970 | BBA_08958 | 2.14 | 1.01E-35 | 2.02E-34 | up | casein kinase 1 epsilon                              |
| 19893160 | BBA_10148 | 2.14 | 6.22E-26 | 8.93E-25 | up | hypothetical protein BBA_10148                       |
| 19886910 | BBA_03898 | 2.15 | 3.32E-42 | 8.10E-41 | up | small secreted protein                               |
| 19889041 | BBA_06029 | 2.16 | 3.06E-09 | 1.67E-08 | up | carboxymuconolactone decarboxylase                   |
| 19885673 | BBA_02661 | 2.16 | 3.92E-17 | 3.70E-16 | up | hypothetical protein BBA_02661                       |
| 19885410 | BBA_02398 | 2.16 | 1.31E-63 | 5.44E-62 | up | aromatic and neutral aliphatic amino acid permease   |
| 19893127 | BBA_10115 | 2.17 | 5.77E-20 | 6.32E-19 | up | endo alpha-1,4 polygalactosaminidase precursor       |
| 19891675 | BBA_08663 | 2.18 | 2.29E-21 | 2.70E-20 | up | hypothetical protein BBA_08663                       |
| 19885431 | BBA_02419 | 2.18 | 5.54E-67 | 2.53E-65 | up | adhesin protein Mad1                                 |
| 19892008 | BBA_08996 | 2.18 | 3.53E-32 | 6.28E-31 | up | NADH-cytochrome b5 reductase                         |
| 19893155 | BBA_10143 | 2.19 | 2.33E-15 | 2.00E-14 | up | hypothetical protein BBA_10143                       |
| 19885211 | BBA_02199 | 2.19 | 9.91E-34 | 1.84E-32 | up | neutral amino acid transporter                       |
| 19892127 | BBA_09115 | 2.21 | 1.43E-46 | 3.82E-45 | up | Cupin family protein                                 |
| 19886590 | BBA_03578 | 2.21 | 1.48E-56 | 5.16E-55 | up | siderophore iron transporter mirB                    |
| 19887202 | BBA_04190 | 2.21 | 6.65E-06 | 2.37E-05 | up | tat pathway signal sequence                          |
| 19892450 | BBA_09438 | 2.21 | 7.40E-09 | 3.87E-08 | up | Methyltransferase type 11                            |
| 19888835 | BBA_05823 | 2.22 | 7.43E-14 | 5.78E-13 | up | NAD-dependent epimerase/dehydratase                  |
| 19885563 | BBA_02551 | 2.22 | 1.16E-08 | 5.95E-08 | up | hypothetical protein BBA_02551                       |
| 19891273 | BBA_08261 | 2.23 | 1.30E-31 | 2.28E-30 | up | inositol oxygenase, putative                         |
| 19883683 | BBA_00671 | 2.23 | 7.14E-08 | 3.32E-07 | up | PLAC8 family protein                                 |
| 19888160 | BBA_05148 | 2.24 | 1.76E-27 | 2.67E-26 | up | Acyl-CoA N-acyltransferase                           |
| 19890880 | BBA_07868 | 2.25 | 3.43E-65 | 1.49E-63 | up | hypothetical protein BBA_07868                       |
| 19892315 | BBA_09303 | 2.25 | 5.85E-33 | 1.07E-31 | up | hypothetical protein BBA_09303                       |
| 19891440 | BBA_08428 | 2.26 | 4.28E-37 | 8.94E-36 | up | efflux pump antibiotic resistance protein            |
| 19888573 | BBA_05561 | 2.26 | 1.30E-44 | 3.36E-43 | up | RNA 3'-terminal phosphate cyclase                    |
| 19890991 | BBA_07979 | 2.27 | 3.47E-53 | 1.12E-51 | up | hypothetical protein BBA_07979                       |
| 19883109 | BBA_00097 | 2.28 | 1.88E-38 | 4.07E-37 | up | 3-hydroxyacyl-CoA dehydrogenase                      |
| 19890398 | BBA_07386 | 2.28 | 1.44E-09 | 8.08E-09 | up | hypothetical protein BBA_07386                       |
| 19892637 | BBA_09625 | 2.29 | 1.93E-21 | 2.28E-20 | up | dsp1-1-like protein                                  |
| 19891272 | BBA_08260 | 2.29 | 3.28E-09 | 1.78E-08 | up | hypothetical protein BBA_08260                       |
| 19886008 | BBA_02996 | 2.31 | 5.88E-53 | 1.88E-51 | up | antigenic cell wall galactomannoprotein, putative    |
| 19884918 | BBA_01906 | 2.32 | 1.79E-15 | 1.54E-14 | up | mitochondrial carrier protein (Pet8)                 |
| 19889944 | BBA_06932 | 2.32 | 7.83E-61 | 3.11E-59 | up | Carbamoyl transferase                                |
| 19886574 | BBA_03562 | 2.32 | 3.30E-24 | 4.40E-23 | up | hypothetical protein BBA_03562                       |
| 19892443 | BBA_09431 | 2.32 | 4.67E-22 | 5.64E-21 | up | hypothetical protein BBA_09431                       |
| 19890384 | BBA_07372 | 2.33 | 4.32E-13 | 3.20E-12 | up | homogentisate 1,2-dioxygenase                        |
| 19883458 | BBA_00446 | 2.33 | 2.97E-35 | 5.86E-34 | up | oxidoreductase-like protein                          |
| 19892605 | BBA_09593 | 2.33 | 3.04E-65 | 1.32E-63 | up | adenosine deaminase                                  |
| 19888122 | BBA_05110 | 2.35 | 2.25E-13 | 1.70E-12 | up | phloretin hydrolase                                  |
| 19884548 | BBA_01536 | 2.35 | 1.33E-14 | 1.10E-13 | up | hypothetical protein BBA_01536                       |
| 19890020 | BBA_07008 | 2.36 | 2.73E-72 | 1.42E-70 | up | 2,3-diketo-5-methylthio-1-phosphopentane phosphatase |
| 19888588 | BBA_05576 | 2.39 | 3.76E-32 | 6.68E-31 | up | hypothetical protein BBA_05576                       |
| 19892225 | BBA_09213 | 2.40 | 2.35E-17 | 2.25E-16 | up | hypothetical protein BBA_09213                       |
| 19889344 | BBA_06332 | 2.41 | 9.19E-76 | 5.11E-74 | up | gamma-glutamyltranspeptidase                         |
| 19891593 | BBA_08581 | 2.41 | 2.04E-08 | 1.01E-07 | up | hypothetical protein BBA_08581                       |
| 19885776 | BBA_02764 | 2.41 | 7.11E-41 | 1.66E-39 | up | phenazine biosynthesis-like protein                  |
| 19887101 | BBA_04089 | 2.42 | 2.29E-50 | 6.78E-49 | up | zinc-binding dehydrogenase                           |
| 19889697 | BBA_06685 | 2.44 | 8.54E-84 | 5.89E-82 | up | hypothetical protein BBA_06685                       |
| 19892915 | BBA_09903 | 2.45 | 4.70E-16 | 4.18E-15 | up | hypothetical protein BBA_09903                       |
| 19893159 | BBA_10147 | 2.46 | 2.26E-24 | 3.04E-23 | up | hypothetical protein BBA_10147                       |
| 19888451 | BBA_05439 | 2.46 | 9.49E-68 | 4.40E-66 | up | Cytochrome P450 CYP539B1                             |

|          |           |      |           |           |    |                                                        |
|----------|-----------|------|-----------|-----------|----|--------------------------------------------------------|
| 19892446 | BBA_09434 | 2.48 | 2.30E-19  | 2.45E-18  | up | hypothetical protein BBA_09434                         |
| 19887133 | BBA_04121 | 2.49 | 6.69E-13  | 4.88E-12  | up | ethanolamine utilization protein (EutQ)                |
| 19890100 | BBA_07088 | 2.49 | 2.82E-32  | 5.05E-31  | up | xylose isomerase-like TIM barrel                       |
| 19892213 | BBA_09201 | 2.49 | 3.12E-28  | 4.88E-27  | up | hypothetical protein BBA_09201                         |
| 19883570 | BBA_00558 | 2.50 | 1.02E-12  | 7.28E-12  | up | hypothetical protein BBA_00558                         |
| 19889178 | BBA_06166 | 2.51 | 1.48E-75  | 8.14E-74  | up | alcohol dehydrogenase I                                |
| 19883819 | BBA_00807 | 2.51 | 2.95E-48  | 8.36E-47  | up | glucose repressible protein Grg1                       |
| 19890726 | BBA_07714 | 2.52 | 1.29E-26  | 1.90E-25  | up | hypothetical protein BBA_07714                         |
| 19885593 | BBA_02581 | 2.52 | 9.39E-61  | 3.69E-59  | up | fatty acid hydroxylase superfamily protein             |
| 19887264 | BBA_04252 | 2.53 | 1.41E-56  | 4.94E-55  | up | F1F0-ATP synthase regulatory factor Stf2               |
| 19886506 | BBA_03494 | 2.55 | 1.38E-35  | 2.75E-34  | up | hypothetical protein BBA_03494                         |
| 19891875 | BBA_08863 | 2.58 | 6.69E-15  | 5.60E-14  | up | metalloprotease 1                                      |
| 19891963 | BBA_08951 | 2.59 | 9.92E-22  | 1.18E-20  | up | hypothetical protein BBA_08951                         |
| 19891701 | BBA_08689 | 2.60 | 1.39E-14  | 1.15E-13  | up | Putative GMC oxidoreductase                            |
| 19887340 | BBA_04328 | 2.62 | 4.62E-26  | 6.67E-25  | up | aminotriazole resistance protein                       |
| 19888658 | BBA_05646 | 2.63 | 4.83E-28  | 7.47E-27  | up | autophagy protein (Atg22), putative                    |
| 19887681 | BBA_04669 | 2.63 | 9.33E-23  | 1.17E-21  | up | 3-octaprenyl-4-hydroxybenzoate carboxy-lyase, putative |
| 19888024 | BBA_05012 | 2.63 | 1.81E-18  | 1.84E-17  | up | Carbohydrate kinase, thermoresistant glucokinase       |
| 19893278 | BBA_10266 | 2.66 | 6.55E-32  | 1.15E-30  | up | sugar transporter                                      |
| 19892121 | BBA_09109 | 2.67 | 2.93E-40  | 6.77E-39  | up | Catalase-like domain, heme-dependent                   |
| 19889850 | BBA_06838 | 2.68 | 9.27E-40  | 2.11E-38  | up | phospholipase/carboxylesterase                         |
| 19892243 | BBA_09231 | 2.69 | 6.79E-32  | 1.19E-30  | up | hypothetical protein BBA_09231                         |
| 19891978 | BBA_08966 | 2.70 | 4.27E-35  | 8.39E-34  | up | hypothetical protein BBA_08966                         |
| 19892055 | BBA_09043 | 2.72 | 4.35E-39  | 9.75E-38  | up | mitogen-activated protein kinase styl                  |
| 19892448 | BBA_09436 | 2.72 | 3.08E-48  | 8.67E-47  | up | zinc finger-like protein                               |
| 19891824 | BBA_08812 | 2.72 | 1.65E-95  | 1.51E-93  | up | secreted lipase 1 precursor                            |
| 19890645 | BBA_07633 | 2.72 | 3.78E-16  | 3.37E-15  | up | hypothetical protein BBA_07633                         |
| 19892004 | BBA_08992 | 2.73 | 3.10E-31  | 5.36E-30  | up | branched-chain-amino-acid aminotransferase             |
| 19887697 | BBA_04685 | 2.74 | 1.08E-99  | 1.07E-97  | up | 2OG-Fe(II) oxygenase superfamily protein               |
| 19885377 | BBA_02365 | 2.75 | 1.82E-60  | 7.08E-59  | up | hypothetical protein BBA_02365                         |
| 19890635 | BBA_07623 | 2.75 | 1.72E-81  | 1.09E-79  | up | trehalase-like protein                                 |
| 19887710 | BBA_04698 | 2.77 | 1.02E-63  | 4.30E-62  | up | hypothetical protein BBA_04698                         |
| 19883484 | BBA_00472 | 2.78 | 1.20E-97  | 1.16E-95  | up | 3-dehydroquinase synthase                              |
| 19884975 | BBA_01963 | 2.79 | 2.00E-36  | 4.11E-35  | up | pepsin A1                                              |
| 19883482 | BBA_00470 | 2.79 | 6.64E-83  | 4.45E-81  | up | ATP-grasp enzyme-like protein                          |
| 19891735 | BBA_08723 | 2.82 | 5.71E-25  | 7.98E-24  | up | Ep11 protein                                           |
| 19886929 | BBA_03917 | 2.84 | 2.00E-26  | 2.93E-25  | up | hypothetical protein BBA_03917                         |
| 19885620 | BBA_02608 | 2.85 | 1.34E-14  | 1.11E-13  | up | biotrophy-associated secreted protein 2                |
| 19885023 | BBA_02011 | 2.85 | 2.42E-14  | 1.96E-13  | up | zinc finger protein Nv-ZicA                            |
| 19888691 | BBA_05679 | 2.90 | 1.14E-37  | 2.42E-36  | up | HHE domain-containing protein                          |
| 19892292 | BBA_09280 | 2.90 | 1.07E-19  | 1.16E-18  | up | hypothetical protein BBA_09280                         |
| 19886962 | BBA_03950 | 2.91 | 3.07E-23  | 3.93E-22  | up | Beta-lactamase-type transpeptidase                     |
| 19887509 | BBA_04497 | 2.91 | 1.86E-13  | 1.41E-12  | up | retrotransposon protein, putative, Ty1-copia subclass  |
| 19890004 | BBA_06992 | 2.92 | 9.35E-88  | 7.36E-86  | up | short chain dehydrogenase                              |
| 19884549 | BBA_01537 | 2.93 | 2.62E-56  | 9.04E-55  | up | hypothetical protein BBA_01537                         |
| 19888277 | BBA_05265 | 2.98 | 1.07E-95  | 1.00E-93  | up | hypothetical protein BBA_05265                         |
| 19889198 | BBA_06186 | 2.98 | 4.26E-97  | 4.07E-95  | up | Catalase-like domain, heme-dependent                   |
| 19892478 | BBA_09466 | 2.99 | 2.64E-22  | 3.24E-21  | up | hypothetical protein BBA_09466                         |
| 19887922 | BBA_04910 | 2.99 | 5.01E-40  | 1.15E-38  | up | hypothetical protein BBA_04910                         |
| 19883073 | BBA_00061 | 3.00 | 2.27E-34  | 4.30E-33  | up |                                                        |
| 19890003 | BBA_06991 | 3.00 | 2.61E-98  | 2.56E-96  | up |                                                        |
| 19888448 | BBA_05436 | 3.00 | 4.09E-67  | 1.89E-65  | up | hypothetical protein BBA_05436                         |
| 19884038 | BBA_01026 | 3.01 | 1.09E-120 | 1.41E-118 | up | hypothetical protein BBA_01026                         |
| 19893156 | BBA_10144 | 3.02 | 8.79E-43  | 2.18E-41  | up | Methyltransferase type 11                              |
| 19883762 | BBA_00750 | 3.03 | 2.61E-59  | 9.76E-58  | up | hypothetical protein BBA_00750                         |
| 19888976 | BBA_05964 | 3.03 | 6.52E-32  | 1.15E-30  | up | hypothetical protein BBA_05964                         |
| 19893015 | BBA_10003 | 3.03 | 6.26E-39  | 1.40E-37  | up | mitochondrial chaperone BCS1                           |
| 19887485 | BBA_04473 | 3.04 | 2.57E-46  | 6.81E-45  | up | hypothetical protein BBA_04473                         |
| 19887000 | BBA_03988 | 3.05 | 3.68E-62  | 1.49E-60  | up | hypothetical protein BBA_03988                         |
| 19888666 | BBA_05654 | 3.05 | 2.75E-86  | 2.02E-84  | up | OsmC-like protein                                      |
| 19892449 | BBA_09437 | 3.06 | 3.29E-31  | 5.65E-30  | up | C2H2 finger domain protein, putative                   |

|          |           |      |           |           |    |                                                    |
|----------|-----------|------|-----------|-----------|----|----------------------------------------------------|
| 19886948 | BBA_03936 | 3.06 | 2.83E-37  | 5.93E-36  | up | DUF1264 domain-containing protein                  |
| 19892186 | BBA_09174 | 3.07 | 1.32E-63  | 5.45E-62  | up | cell surface protein                               |
| 19889044 | BBA_06032 | 3.09 | 1.04E-54  | 3.50E-53  | up | spherulin-1A                                       |
| 19891677 | BBA_08665 | 3.11 | 1.36E-11  | 9.02E-11  | up | trypsin-like protease                              |
| 19890418 | BBA_07406 | 3.12 | 3.48E-09  | 1.89E-08  | up | acyl-CoA thioesterase II                           |
| 19890850 | BBA_07838 | 3.12 | 8.47E-75  | 4.57E-73  | up | hypothetical protein BBA_07838                     |
| 19888332 | BBA_05320 | 3.12 | 1.50E-82  | 9.95E-81  | up | plasma membrane zinc ion transporter, putative     |
| 19892007 | BBA_08995 | 3.14 | 4.25E-84  | 2.95E-82  | up | hypothetical protein BBA_08995                     |
| 19884472 | BBA_01460 | 3.15 | 1.64E-68  | 7.87E-67  | up | hypothetical protein BBA_01460                     |
| 19886224 | BBA_03212 | 3.17 | 7.09E-121 | 9.30E-119 | up | phthalate transporter                              |
| 19892214 | BBA_09202 | 3.19 | 4.65E-111 | 5.05E-109 | up | hypothetical protein BBA_09202                     |
| 19885787 | BBA_02775 | 3.20 | 4.26E-89  | 3.47E-87  | up | Amine oxidase                                      |
| 19889468 | BBA_06456 | 3.20 | 6.02E-26  | 8.65E-25  | up | HAD-superfamily hydrolase, subfamily IA, variant 1 |
| 19886261 | BBA_03249 | 3.20 | 2.69E-24  | 3.61E-23  | up | hypothetical protein BBA_03249                     |
| 19887619 | BBA_04607 | 3.21 | 3.20E-43  | 8.00E-42  | up | hypothetical protein BBA_04607                     |
| 19883880 | BBA_00868 | 3.22 | 5.16E-52  | 1.58E-50  | up | G-protein coupled receptor                         |
| 19892640 | BBA_09628 | 3.23 | 4.68E-22  | 5.65E-21  | up | C6 zinc finger domain-containing protein           |
| 19892185 | BBA_09173 | 3.23 | 8.79E-28  | 1.35E-26  | up | hypothetical protein BBA_09173                     |
| 19885133 | BBA_02121 | 3.23 | 2.42E-20  | 2.72E-19  | up | hypothetical protein BBA_02121                     |
| 19891451 | BBA_08439 | 3.23 | 2.63E-98  | 2.56E-96  | up | zinc-binding dehydrogenase                         |
| 19888779 | BBA_05767 | 3.24 | 1.64E-128 | 2.62E-126 | up | tetracycline efflux protein (otrb)                 |
| 19891997 | BBA_08985 | 3.25 | 2.29E-21  | 2.70E-20  | up | ThiJ/PfpI family protein                           |
| 19885944 | BBA_02932 | 3.25 | 4.57E-60  | 1.76E-58  | up | General substrate transporter                      |
| 19892313 | BBA_09301 | 3.28 | 1.01E-12  | 7.23E-12  | up | amino acid transporter                             |
| 19886964 | BBA_03952 | 3.29 | 2.45E-26  | 3.58E-25  | up | glutathione-dependent formaldehyde-activating, GFA |
| 19889285 | BBA_06273 | 3.32 | 7.59E-75  | 4.12E-73  | up | OPT oligopeptide transporter                       |
| 19892281 | BBA_09269 | 3.33 | 1.62E-18  | 1.65E-17  | up | secreted lipase 1 precursor                        |
| 19888276 | BBA_05264 | 3.33 | 3.62E-58  | 1.31E-56  | up | chitinase-like protein                             |
| 19891517 | BBA_08505 | 3.34 | 3.70E-65  | 1.60E-63  | up | subtilase-like protein                             |
| 19890794 | BBA_07782 | 3.36 | 1.20E-58  | 4.39E-57  | up | hypothetical protein BBA_07782                     |
| 19892971 | BBA_09959 | 3.39 | 1.96E-135 | 3.49E-133 | up | hypothetical protein BBA_09959                     |
| 19887698 | BBA_04686 | 3.40 | 2.75E-52  | 8.49E-51  | up | pantothenate transporter                           |
| 19892966 | BBA_09954 | 3.42 | 2.30E-124 | 3.45E-122 | up | C2H2 finger domain protein, putative               |
| 19892183 | BBA_09171 | 3.42 | 1.85E-71  | 9.45E-70  | up | hypothetical protein BBA_09171                     |
| 19885592 | BBA_02580 | 3.48 | 1.88E-121 | 2.53E-119 | up | allergen-like protein                              |
| 19891544 | BBA_08532 | 3.51 | 3.86E-42  | 9.41E-41  | up | hypothetical protein BBA_08532                     |
| 19888690 | BBA_05678 | 3.54 | 1.16E-60  | 4.54E-59  | up | nitrogen assimilation transcription factor nirA    |
| 19889043 | BBA_06031 | 3.56 | 8.47E-21  | 9.73E-20  | up | metallo-beta-lactamase superfamily protein         |
| 19890102 | BBA_07090 | 3.56 | 4.21E-29  | 6.71E-28  | up | hypothetical protein BBA_07090                     |
| 19892180 | BBA_09168 | 3.57 | 5.42E-87  | 4.13E-85  | up | retinol dehydrogenase 12                           |
| 19893010 | BBA_09998 | 3.57 | 3.58E-91  | 3.02E-89  | up | conidial wall protein                              |
| 19884850 | BBA_01838 | 3.58 | 6.28E-60  | 2.40E-58  | up | hypothetical protein BBA_01838                     |
| 19887734 | BBA_04722 | 3.59 | 8.85E-26  | 1.26E-24  | up | hypothetical protein BBA_04722                     |
| 19884627 | BBA_01615 | 3.60 | 9.22E-147 | 1.89E-144 | up | aquaporin-2                                        |
| 19885395 | BBA_02383 | 3.61 | 6.13E-74  | 3.25E-72  | up | hypothetical protein BBA_02383                     |
| 19892074 | BBA_09062 | 3.63 | 1.09E-38  | 2.39E-37  | up | hypothetical protein BBA_09062                     |
| 19887720 | BBA_04708 | 3.65 | 1.23E-61  | 4.90E-60  | up | hypothetical protein BBA_04708                     |
| 19891769 | BBA_08757 | 3.66 | 4.58E-31  | 7.82E-30  | up | FAD binding domain-containing protein              |
| 19890509 | BBA_07497 | 3.70 | 2.26E-84  | 1.58E-82  | up | hypothetical protein BBA_07497                     |
| 19887735 | BBA_04723 | 3.72 | 4.54E-20  | 5.01E-19  | up | hypothetical protein BBA_04723                     |
| 19891979 | BBA_08967 | 3.73 | 1.46E-94  | 1.28E-92  | up | fungal zinc cluster transcription factor           |
| 19885778 | BBA_02766 | 3.74 | 2.34E-50  | 6.90E-49  | up | BTB domain transcription factor                    |
| 19884290 | BBA_01278 | 3.75 | 2.08E-85  | 1.49E-83  | up | pyridoxamine 5'-phosphate oxidase                  |
| 19885581 | BBA_02569 | 3.77 | 9.87E-82  | 6.34E-80  | up | hypothetical protein BBA_02569                     |
| 19887100 | BBA_04088 | 3.78 | 3.77E-55  | 1.28E-53  | up | hypothetical protein BBA_04088                     |
| 19890354 | BBA_07342 | 3.79 | 1.45E-20  | 1.65E-19  | up | C6 transcription factor                            |
| 19887116 | BBA_04104 | 3.79 | 1.47E-100 | 1.48E-98  | up | DNA-binding protein                                |
| 19889459 | BBA_06447 | 3.83 | 8.90E-53  | 2.78E-51  | up | hypothetical protein BBA_06447                     |
| 19893246 | BBA_10234 | 3.85 | 7.60E-40  | 1.73E-38  | up | tetratricopeptide repeat domain protein            |
| 19888767 | BBA_05755 | 3.86 | 2.34E-81  | 1.46E-79  | up | hypothetical protein BBA_05755                     |
| 19889199 | BBA_06187 | 3.87 | 1.11E-77  | 6.45E-76  | up | hypothetical protein BBA_06187                     |

|          |           |       |           |           |    |                                                  |
|----------|-----------|-------|-----------|-----------|----|--------------------------------------------------|
| 19883859 | BBA_00847 | 3.88  | 4.84E-116 | 5.72E-114 | up | alkaline phosphatase                             |
| 19885739 | BBA_02727 | 3.91  | 3.52E-33  | 6.44E-32  | up | Chymotrypsin-like protein                        |
| 19883811 | BBA_00799 | 3.92  | 2.80E-172 | 7.77E-170 | up | phosphate transporter                            |
| 19892052 | BBA_09040 | 4.01  | 3.15E-33  | 5.78E-32  | up | hypothetical protein BBA_09040                   |
| 19890981 | BBA_07969 | 4.05  | 6.92E-30  | 1.14E-28  | up | cutinase precursor                               |
| 19891770 | BBA_08758 | 4.06  | 2.52E-70  | 1.25E-68  | up | FAD dependent oxidoreductase                     |
| 19885109 | BBA_02097 | 4.08  | 1.71E-52  | 5.31E-51  | up | gll2891-like protein                             |
| 19893189 | BBA_10177 | 4.10  | 3.03E-18  | 3.04E-17  | up | phosphatidylserine decarboxylase                 |
| 19889020 | BBA_06008 | 4.19  | 8.48E-53  | 2.66E-51  | up | FAD binding domain-containing protein            |
| 19886947 | BBA_03935 | 4.19  | 1.59E-88  | 1.27E-86  | up | hypothetical protein BBA_03935                   |
| 19891502 | BBA_08490 | 4.25  | 7.13E-13  | 5.19E-12  | up | hypothetical protein BBA_08490                   |
| 19892038 | BBA_09026 | 4.28  | 9.84E-76  | 5.43E-74  | up | isochorismatase family protein                   |
| 19892609 | BBA_09597 | 4.36  | 1.41E-123 | 1.99E-121 | up |                                                  |
| 19890335 | BBA_07323 | 4.39  | 3.22E-80  | 1.99E-78  | up | 6-phosphogluconate dehydrogenase                 |
| 19887102 | BBA_04090 | 4.39  | 1.26E-127 | 1.98E-125 | up | short-chain dehydrogenase                        |
| 19893228 | BBA_10216 | 4.40  | 1.96E-52  | 6.09E-51  | up | hypothetical protein BBA_10216                   |
| 19885466 | BBA_02454 | 4.45  | 3.37E-130 | 5.59E-128 | up | hypothetical protein BBA_02454                   |
| 19891503 | BBA_08491 | 4.51  | 2.07E-34  | 3.94E-33  | up | GEgh16 protein                                   |
| 19892945 | BBA_09933 | 4.51  | 7.51E-79  | 4.49E-77  | up | hypothetical protein BBA_09933                   |
| 19883069 | BBA_00057 | 4.55  | 2.74E-17  | 2.61E-16  | up | hypothetical protein BBA_00057                   |
| 19889062 | BBA_06050 | 4.62  | 4.64E-83  | 3.13E-81  | up | hypothetical protein BBA_06050                   |
| 19892608 | BBA_09596 | 4.66  | 4.87E-64  | 2.06E-62  | up | succinate dehydrogenase cytochrome b subunit     |
| 19892244 | BBA_09232 | 4.69  | 1.60E-54  | 5.31E-53  | up | hypothetical protein BBA_09232                   |
| 19887719 | BBA_04707 | 4.71  | 1.63E-28  | 2.55E-27  | up | hypothetical protein BBA_04707                   |
| 19883636 | BBA_00624 | 4.72  | 6.78E-14  | 5.29E-13  | up | hypothetical protein BBA_00624                   |
| 19893267 | BBA_10255 | 4.74  | 7.21E-118 | 8.96E-116 | up | Methyltransferase type 11                        |
| 19891504 | BBA_08492 | 4.94  | 3.20E-36  | 6.53E-35  | up | extracellular serine-rich protein                |
| 19885904 | BBA_02892 | 5.05  | 6.65E-255 | 5.71E-252 | up | hypothetical protein BBA_02892                   |
| 19886256 | BBA_03244 | 5.34  | 4.98E-167 | 1.31E-164 | up | HLH transcription factor                         |
| 19892447 | BBA_09435 | 5.36  | 3.11E-193 | 1.22E-190 | up | C6 zinc finger domain-containing protein         |
| 19885614 | BBA_02602 | 5.51  | 1.92E-238 | 1.40E-235 | up | cell wall protein                                |
| 19892970 | BBA_09958 | 5.56  | 2.83E-158 | 6.67E-156 | up | hypothetical protein BBA_09958                   |
| 19893296 | BBA_10284 | 5.56  | 1.17E-47  | 3.21E-46  | up | mitochondrial chaperone bcs1                     |
| 19892515 | BBA_09503 | 5.91  | 7.38E-118 | 9.05E-116 | up | WD domain protein                                |
| 19893148 | BBA_10136 | 5.94  | 3.91E-19  | 4.12E-18  | up | Ferritin/ribonucleotide reductase                |
| 19892269 | BBA_09257 | 6.20  | 2.34E-86  | 1.72E-84  | up | cis,cis-muconate lactonizing enzyme precursor    |
| 19886507 | BBA_03495 | 6.34  | 3.79E-154 | 8.33E-152 | up | fatty acid hydroxylase superfamily protein       |
| 19893266 | BBA_10254 | 6.88  | 7.28E-49  | 2.09E-47  | up | hypothetical protein BBA_10254                   |
| 19886961 | BBA_03949 | 6.88  | 4.16E-274 | 3.93E-271 | up | hydroxyacylglutathione hydrolase                 |
| 19889508 | BBA_06496 | 7.09  | 2.33E-48  | 6.65E-47  | up | penicillin-binding protein                       |
| 19892967 | BBA_09955 | 7.12  | 3.11E-205 | 1.33E-202 | up | dsp1-1-like protein                              |
| 19892916 | BBA_09904 | 7.14  | 1.01E-245 | 7.98E-243 | up | hypothetical protein BBA_09904                   |
| 19892767 | BBA_09755 | 7.32  | 2.24E-58  | 8.17E-57  | up | epoxide hydrolase                                |
| 19891678 | BBA_08666 | 7.38  | 3.02E-150 | 6.33E-148 | up | bacteriodes thetaiotaomicron symbiotic chitinase |
| 19886504 | BBA_03492 | 7.47  | 0.00E+00  | 0.00E+00  | up | hypothetical protein BBA_03492                   |
| 19883051 | BBA_00039 | 7.54  | 4.37E-72  | 2.25E-70  | up | hypothetical protein BBA_00039                   |
| 19892917 | BBA_09905 | 7.79  | 1.04E-141 | 2.01E-139 | up | hypothetical protein BBA_09905                   |
| 19893147 | BBA_10135 | 8.50  | 5.97E-65  | 2.55E-63  | up | hypothetical protein BBA_10135                   |
| 19887629 | BBA_04617 | 9.13  | 5.15E-97  | 4.86E-95  | up | subtilisin-like protease Pr1A                    |
| 19886257 | BBA_03245 | 9.64  | 5.33E-91  | 4.45E-89  | up | cell wall protein                                |
| 19886505 | BBA_03493 | 11.36 | 0.00E+00  | 0.00E+00  | up | cell wall protein                                |
| 19886259 | BBA_03247 | 11.81 | 2.47E-113 | 2.77E-111 | up | cell wall protein                                |
| 19886260 | BBA_03248 | 12.05 | 0.00E+00  | 0.00E+00  | up | major facilitator superfamily transporter        |
| 19886258 | BBA_03246 | 12.08 | 0.00E+00  | 0.00E+00  | up | cell wall protein                                |
| 19887959 | BBA_04947 | 15.32 | 9.03E-78  | 5.30E-76  | up | Cytochrome P450 CYP617A1                         |
| 19887958 | BBA_04946 | 15.71 | 4.39E-86  | 3.17E-84  | up | flavin-binding monooxygenase, putative           |
| 19890612 | BBA_07600 | 15.84 | 4.53E-44  | 1.14E-42  | up | hypothetical protein BBA_07600                   |

**Table S4.** Counts of *Δcre1*-specific dysregulated genes enriched to GO terms in three function classes of *B. bassiana* at the significant level of  $p < 0.05$ .

| Enriched GO terms                                                                                        | Counts of enriched DEGs |            |            |
|----------------------------------------------------------------------------------------------------------|-------------------------|------------|------------|
|                                                                                                          | Down                    | Up         | Subtotal   |
| <b>Function Class: Cellular Component</b>                                                                |                         |            |            |
| cellular component                                                                                       | 455                     | 303        | 758        |
| integral component of membrane                                                                           | 52                      | 40         | 92         |
| extracellular region                                                                                     | 28                      | 9          | 37         |
| RISC complex                                                                                             | 4                       | 0          | 4          |
| membrane raft                                                                                            | 2                       | 2          | 4          |
| <b>Total</b>                                                                                             | <b>541</b>              | <b>354</b> | <b>895</b> |
| <b>Function Class: Biological Process</b>                                                                |                         |            |            |
| biological_process                                                                                       | 268                     | 183        | 451        |
| oxidation-reduction process                                                                              | 64                      | 42         | 106        |
| transmembrane transport                                                                                  | 48                      | 38         | 86         |
| metabolic process                                                                                        | 20                      | 25         | 45         |
| proteolysis                                                                                              | 26                      | 4          | 30         |
| methylation                                                                                              | 8                       | 5          | 13         |
| nucleoside metabolic process                                                                             | 10                      | 2          | 12         |
| fatty acid biosynthetic process                                                                          | 2                       | 8          | 10         |
| protein catabolic process                                                                                | 6                       | 2          | 8          |
| glucose import                                                                                           | 4                       | 4          | 8          |
| steroid metabolic process                                                                                | 3                       | 3          | 6          |
| nonribosomal peptide biosynthetic process                                                                | 5                       | 0          | 5          |
| drug transmembrane transport                                                                             | 4                       | 1          | 5          |
| lipid catabolic process                                                                                  | 2                       | 3          | 5          |
| fatty acid metabolic process                                                                             | 1                       | 4          | 5          |
| proteolysis involved in cellular protein catabolic process                                               | 5                       | 0          | 5          |
| cadmium ion transport                                                                                    | 2                       | 2          | 4          |
| fatty acid catabolic process                                                                             | 4                       | 0          | 4          |
| regulation of small GTPase mediated signal transduction                                                  | 4                       | 0          | 4          |
| cellular carbohydrate catabolic process                                                                  | 3                       | 1          | 4          |
| response to oxidative stress                                                                             | 4                       | 0          | 4          |
| phospholipid biosynthetic process                                                                        | 2                       | 2          | 4          |
| oxalate metabolic process                                                                                | 2                       | 1          | 3          |
| cellular aromatic compound metabolic process                                                             | 2                       | 1          | 3          |
| methylglyoxal catabolic process to D-lactate via S-lactoyl-glutathione                                   | 0                       | 3          | 3          |
| regulation of filamentous growth of a population of unicellular organisms in response to biotic stimulus | 3                       | 0          | 3          |
| carotene biosynthetic process                                                                            | 2                       | 0          | 2          |
| cinnamic acid catabolic process                                                                          | 0                       | 2          | 2          |
| conversion of ds siRNA to ss siRNA involved in RNA interference                                          | 2                       | 0          | 2          |
| D-gluconate metabolic process                                                                            | 2                       | 0          | 2          |
| emericellamide A biosynthetic process                                                                    | 2                       | 0          | 2          |
| ergot alkaloid biosynthetic process                                                                      | 2                       | 0          | 2          |
| glycoside catabolic process                                                                              | 2                       | 0          | 2          |
| oxylipin biosynthetic process                                                                            | 2                       | 0          | 2          |
| aromatic compound catabolic process                                                                      | 2                       | 0          | 2          |
| polysaccharide catabolic process                                                                         | 2                       | 0          | 2          |
| positive regulation of telomere maintenance via telomerase                                               | 1                       | 1          | 2          |
| purine nucleobase catabolic process                                                                      | 2                       | 0          | 2          |
| triglyceride catabolic process                                                                           | 0                       | 2          | 2          |
| <b>Total</b>                                                                                             | <b>523</b>              | <b>339</b> | <b>862</b> |

| <b>Function Class: Molecular Function</b>                                                             |            |            |            |
|-------------------------------------------------------------------------------------------------------|------------|------------|------------|
| molecular_function                                                                                    | 255        | 200        | 455        |
| oxidoreductase activity                                                                               | 38         | 35         | 73         |
| catalytic activity                                                                                    | 38         | 22         | 60         |
| iron ion binding                                                                                      | 26         | 12         | 38         |
| heme binding                                                                                          | 26         | 7          | 33         |
| oxidoreductase activity, acting on paired donors, with incorporation or reduction of molecular oxygen | 26         | 6          | 32         |
| electron carrier activity                                                                             | 22         | 6          | 28         |
| monooxygenase activity                                                                                | 13         | 6          | 19         |
| nucleoside-triphosphatase activity                                                                    | 13         | 6          | 19         |
| flavin adenine dinucleotide binding                                                                   | 11         | 7          | 18         |
| transmembrane transporter activity                                                                    | 9          | 7          | 16         |
| S-adenosylmethionine-dependent methyltransferase activity                                             | 8          | 7          | 15         |
| lipase/triglyceride lipase activity                                                                   | 9          | 5          | 14         |
| sequence-specific DNA binding                                                                         | 11         | 3          | 14         |
| serine-type endopeptidase activity                                                                    | 9          | 4          | 13         |
| aspartic-type endopeptidase activity                                                                  | 8          | 2          | 10         |
| phosphopantetheine binding                                                                            | 8          | 0          | 8          |
| glucose transmembrane transporter activity                                                            | 4          | 4          | 8          |
| substrate-specific transmembrane transporter activity                                                 | 5          | 3          | 8          |
| oxidoreductase activity, acting on CH-OH group of donors                                              | 3          | 4          | 7          |
| acid phosphatase activity                                                                             | 6          | 0          | 6          |
| coenzyme binding                                                                                      | 3          | 3          | 6          |
| serine-type carboxypeptidase activity                                                                 | 6          | 0          | 6          |
| FMN binding                                                                                           | 3          | 3          | 6          |
| carboxy-lyase activity                                                                                | 0          | 5          | 5          |
| O-methyltransferase activity                                                                          | 2          | 3          | 5          |
| guanyl-nucleotide exchange factor activity                                                            | 5          | 0          | 5          |
| cation-transporting ATPase activity                                                                   | 5          | 0          | 5          |
| protein dimerization activity                                                                         | 3          | 2          | 5          |
| ADP binding                                                                                           | 4          | 0          | 4          |
| serine-type peptidase activity                                                                        | 4          | 0          | 4          |
| oligopeptide transmembrane transporter activity                                                       | 4          | 0          | 4          |
| peroxidase activity                                                                                   | 3          | 0          | 3          |
| ammonium transmembrane transporter activity                                                           | 2          | 1          | 3          |
| beta-N-acetylhexosaminidase activity                                                                  | 3          | 0          | 3          |
| carbon-sulfur lyase activity                                                                          | 0          | 3          | 3          |
| serine-type peptidase activity                                                                        | 0          | 2          | 2          |
| cadmium-exporting ATPase activity                                                                     | 1          | 1          | 2          |
| fatty acid binding                                                                                    | 0          | 2          | 2          |
| glutamate 5-kinase activity                                                                           | 1          | 1          | 2          |
| hydroxymethyl-, formyl- and related transferase activity                                              | 0          | 2          | 2          |
| malate dehydrogenase (decarboxylating) (NAD <sup>+</sup> ) activity                                   | 1          | 1          | 2          |
| siRNA binding                                                                                         | 2          | 0          | 2          |
| chitinase activity                                                                                    | 7          | 0          | 2          |
| <b>Total</b>                                                                                          | <b>607</b> | <b>375</b> | <b>977</b> |

**Table S5.** Counts of *ΔcreI*-specific dysregulated genes enriched to the KEGG pathways of *B. bassiana* at the significant level of  $p < 0.05$ .

| Pathway_ID   | KEGG_pathway_name                             | Counts of enriched DEGs |            |            |
|--------------|-----------------------------------------------|-------------------------|------------|------------|
|              |                                               | Down                    | Up         | Subtotal   |
| ko01200      | Carbon metabolism                             | 19                      | 19         | 38         |
| ko00380      | Tryptophan metabolism                         | 21                      | 10         | 31         |
| ko00350      | Tyrosine metabolism                           | 15                      | 14         | 29         |
| ko00071      | Fatty acid degradation                        | 17                      | 10         | 27         |
| ko00260      | Glycine, serine and threonine metabolism      | 20                      | 7          | 27         |
| ko04146      | Peroxisome                                    | 14                      | 10         | 24         |
| ko00561      | Glycerolipid metabolism                       | 18                      | 5          | 23         |
| ko00010      | Glycolysis / Gluconeogenesis                  | 11                      | 10         | 21         |
| ko02010      | ABC transporters                              | 13                      | 5          | 18         |
| ko00620      | Pyruvate metabolism                           | 12                      | 4          | 16         |
| ko00310      | Lysine degradation                            | 11                      | 5          | 16         |
| ko01212      | Fatty acid metabolism                         | 5                       | 11         | 16         |
| ko00404      | Staurosporine biosynthesis                    | 10                      | 5          | 15         |
| ko00061      | Fatty acid biosynthesis                       | 3                       | 9          | 12         |
| ko00640      | Propanoate metabolism                         | 7                       | 5          | 12         |
| ko00630      | Glyoxylate and dicarboxylate metabolism       | 7                       | 5          | 12         |
| ko00600      | Sphingolipid metabolism                       | 7                       | 4          | 11         |
| ko00030      | Pentose phosphate pathway                     | 5                       | 5          | 10         |
| ko00780      | Biotin metabolism                             | 3                       | 7          | 10         |
| ko00052      | Galactose metabolism                          | 8                       | 1          | 9          |
| ko00511      | Other glycan degradation                      | 5                       | 2          | 7          |
| ko00603      | Glycosphingolipid biosynthesis - globo series | 5                       | 0          | 5          |
| <b>Total</b> |                                               | <b>236</b>              | <b>153</b> | <b>389</b> |

**Table S6.** Lists of *ΔcreI*-specific dysregulated genes associated with phenotypic changes and involved in crucial cellular processes and events of *B. bassiana*.

| Gene_ID                                                                    | Genomic tag_locus | <i>ΔcreI</i> vs. WT       |                |            | Annotation                                   |
|----------------------------------------------------------------------------|-------------------|---------------------------|----------------|------------|----------------------------------------------|
|                                                                            |                   | log <sub>2</sub> <i>R</i> | <i>q</i> value | Regulation |                                              |
| Involved in normal cuticle infection and virulence-related cellular events |                   |                           |                |            |                                              |
| 19885642                                                                   | BBA_02630         | -12.23                    | 6.19E-75       | down       | bassianolide nonribosomal peptide synthetase |
| 19891803                                                                   | BBA_08791         | -8.16                     | 0.00E+00       | down       | alkaline serine protease AorO                |
| 19892188                                                                   | BBA_09176         | -8.01                     | 9.85E-217      | down       | alkaline serine protease AorO                |
| 19886794                                                                   | BBA_03782         | -5.28                     | 3.91E-164      | down       | putative hydrolase                           |
| 19885641                                                                   | BBA_02629         | -4.42                     | 6.22E-26       | down       | Putative conidiospore surface protein        |
| 19888365                                                                   | BBA_05353         | -3.75                     | 1.28E-14       | down       | class III chitinase ChiA2                    |
| 19883647                                                                   | BBA_00635         | -3.45                     | 1.58E-09       | down       | Secretory lipase family protein              |
| 19886826                                                                   | BBA_03814         | -3.41                     | 4.55E-61       | down       | chitinase-like protein                       |
| 19887283                                                                   | BBA_04271         | -3.08                     | 2.02E-77       | down       | pheromone receptor                           |
| 19891433                                                                   | BBA_08421         | -2.77                     | 2.08E-03       | down       | volvatoxin A2 precursor                      |
| 19886459                                                                   | BBA_03447         | -2.70                     | 5.36E-33       | down       | extracellular protein                        |
| 19886921                                                                   | BBA_03909         | -2.62                     | 5.14E-76       | down       | filamentous hemagglutinin / adhesin          |
| 19887096                                                                   | BBA_04084         | -2.45                     | 1.90E-57       | down       | putative aspartic protease                   |
| 19885429                                                                   | BBA_02417         | -2.44                     | 2.01E-46       | down       | secreted aspartic proteinase                 |
| 19889309                                                                   | BBA_06297         | -2.42                     | 2.57E-37       | down       | chitinase-like protein                       |
| 19892301                                                                   | BBA_09289         | -2.39                     | 2.43E-51       | down       | Pectin lyase fold/virulence factor           |
| 19888837                                                                   | BBA_05825         | -2.17                     | 1.45E-25       | down       | secreted glucosidase                         |
| 19892165                                                                   | BBA_09153         | -2.15                     | 1.35E-55       | down       | subtilisin-like serine protease Pr1C         |
| 19889439                                                                   | BBA_06427         | -1.62                     | 6.82E-29       | down       | glycoside hydrolase family 13                |
| 19884015                                                                   | BBA_01003         | -1.49                     | 1.28E-11       | down       | subtilase-like protein                       |
| 19883455                                                                   | BBA_00443         | -1.48                     | 6.63E-15       | down       | subtilisin-like protease Pr1B2               |
| 19885980                                                                   | BBA_02968         | -1.44                     | 1.09E-10       | down       | regulator of G protein signaling             |
| 19891254                                                                   | BBA_08242         | -1.41                     | 1.78E-07       | down       | glycoside hydrolase family 43 protein        |
| 19885226                                                                   | BBA_02214         | -1.30                     | 2.04E-10       | down       | subtilase-like protein                       |
| 19885242                                                                   | BBA_02230         | -1.29                     | 2.13E-16       | down       | chitinase-like protein                       |
| 19885444                                                                   | BBA_02432         | -1.28                     | 3.29E-14       | down       | triacylglycerol lipase                       |
| 19892617                                                                   | BBA_09605         | -1.27                     | 1.93E-03       | down       | chitinase-like protein                       |
| 19890643                                                                   | BBA_07631         | -1.22                     | 7.98E-18       | down       | family S53 protease                          |
| 19890911                                                                   | BBA_07899         | -1.12                     | 2.93E-15       | down       | chitinase 18-3                               |
| 19891435                                                                   | BBA_08423         | -1.01                     | 3.88E-05       | down       | lipase-like protein                          |
| 19883159                                                                   | BBA_00147         | 1.19                      | 1.71E-10       | up         | cutinase-2 protein                           |
| 19888282                                                                   | BBA_05270         | 1.22                      | 2.16E-10       | up         | lipase class 2                               |
| 19888100                                                                   | BBA_05088         | 1.50                      | 2.01E-18       | up         | cutinase-like protein                        |
| 19892132                                                                   | BBA_09120         | 1.52                      | 2.44E-17       | up         | hydrolase-like protein                       |
| 19889182                                                                   | BBA_06170         | 1.64                      | 7.03E-12       | up         | Cry3Aa protein                               |
| 19892512                                                                   | BBA_09500         | 1.91                      | 1.28E-07       | up         | cuticle-degrading serine protease            |
| 19889712                                                                   | BBA_06700         | 2.08                      | 1.93E-08       | up         | alkaline serine protease AorO                |
| 19885431                                                                   | BBA_02419         | 2.18                      | 2.53E-65       | up         | adhesin protein Mad1                         |
| 19891875                                                                   | BBA_08863         | 2.58                      | 5.60E-14       | up         | metalloprotease 1                            |
| 19891677                                                                   | BBA_08665         | 3.11                      | 9.02E-11       | up         | trypsin-like protease                        |
| 19883880                                                                   | BBA_00868         | 3.22                      | 1.58E-50       | up         | G-protein coupled receptor                   |
| 19888276                                                                   | BBA_05264         | 3.33                      | 1.31E-56       | up         | chitinase-like protein                       |
| 19891517                                                                   | BBA_08505         | 3.34                      | 1.60E-63       | up         | subtilase-like protein                       |

|                                                      |           |       |           |      |                                                                        |
|------------------------------------------------------|-----------|-------|-----------|------|------------------------------------------------------------------------|
| 19890981                                             | BBA_07969 | 4.05  | 1.14E-28  | up   | cutinase precursor                                                     |
| 19887629                                             | BBA_04617 | 9.13  | 4.86E-95  | up   | subtilisin-like protease Pr1B3                                         |
| <b>Involved in asexual development (conidiation)</b> |           |       |           |      |                                                                        |
| 19885168                                             | BBA_02156 | -2.85 | 5.77E-85  | down | sporulation associated protein                                         |
| 19886838                                             | BBA_03826 | -1.95 | 6.78E-47  | down | sporulation associated protein                                         |
| 19884540                                             | BBA_01528 | -1.74 | 1.26E-25  | down | frequency clock protein                                                |
| 19885888                                             | BBA_02876 | -1.73 | 4.55E-30  | down | vivid PAS protein VVD                                                  |
| 19883724                                             | BBA_00712 | -1.25 | 1.88E-11  | down | putative C6-zinc finger TF, regulator of conidiation                   |
| 19885439                                             | BBA_02427 | 1.10  | 6.03E-07  | up   | conidiation-specific protein (con-13)                                  |
| <b>Involved in antioxidant response</b>              |           |       |           |      |                                                                        |
| 19886483                                             | BBA_03471 | -5.10 | 1.07E-39  | down | FAD dependent oxidoreductase domain containing protein                 |
| 19892311                                             | BBA_09299 | -4.75 | 7.77E-59  | down | sarcosine oxidase                                                      |
| 19884826                                             | BBA_01814 | -4.52 | 3.49E-154 | down | oxidoreductase, 2OG-Fe(II) oxygenase family                            |
| 19890756                                             | BBA_07744 | -4.08 | 5.14E-71  | down | FAD dependent oxidoreductase                                           |
| 19891755                                             | BBA_08743 | -3.39 | 3.34E-125 | down | sarcosine oxidase                                                      |
| 19883676                                             | BBA_00664 | -2.12 | 8.84E-22  | down | oxidoreductase, short-chain dehydrogenase/reductase family             |
| 19893021                                             | BBA_10009 | -2.10 | 3.88E-18  | down | 6-hydroxy-D-nicotine oxidase                                           |
| 19888615                                             | BBA_05603 | -1.99 | 8.55E-47  | down | Catalase-like domain, heme-dependent                                   |
| 19892783                                             | BBA_09771 | -1.96 | 4.11E-36  | down | FAD dependent oxidoreductase                                           |
| 19892693                                             | BBA_09681 | -1.82 | 3.44E-37  | down | sarcosine oxidase                                                      |
| 19887242                                             | BBA_04230 | -1.70 | 9.20E-32  | down | oxidoreductase family protein                                          |
| 19889838                                             | BBA_06826 | -1.54 | 2.28E-07  | down | glucose oxidase precursor                                              |
| 19885596                                             | BBA_02584 | -1.54 | 2.83E-29  | down | oxidoreductase family protein                                          |
| 19886833                                             | BBA_03821 | -1.46 | 1.27E-12  | down | N,N-dimethylglycine oxidase                                            |
| 19890309                                             | BBA_07297 | -1.28 | 8.62E-13  | down | oxidoreductase, short-chain dehydrogenase/reductase                    |
| 19886832                                             | BBA_03820 | -1.20 | 2.79E-18  | down | sarcosine oxidase                                                      |
| 19887037                                             | BBA_04025 | -1.18 | 1.17E-07  | down | glucose oxidase                                                        |
| 19884227                                             | BBA_01215 | -1.16 | 3.61E-05  | down | oxidoreductase, short chain dehydrogenase/reductase family superfamily |
| 19889492                                             | BBA_06480 | -1.13 | 1.42E-10  | down | oxidoreductase FAD-binding domain-containing protein                   |
| 19890790                                             | BBA_07778 | -1.10 | 1.73E-12  | down | oxidoreductase, 2OG-Fe(II) oxygenase family protein                    |
| 19888833                                             | BBA_05821 | -1.04 | 9.78E-12  | down | oxidoreductase family protein                                          |
| 19889972                                             | BBA_06960 | -1.03 | 1.01E-10  | down | alternative oxidase                                                    |
| 19884605                                             | BBA_01593 | 1.09  | 2.71E-19  | up   | quinone oxidoreductase                                                 |
| 19885566                                             | BBA_02554 | 1.10  | 2.83E-06  | up   | thioredoxin reductase GliT                                             |
| 19889579                                             | BBA_06567 | 1.17  | 3.61E-11  | up   | Catalase-like domain, heme-dependent                                   |
| 19887112                                             | BBA_04100 | 1.20  | 3.35E-14  | up   | GMC oxidoreductase                                                     |
| 19884976                                             | BBA_01964 | 1.22  | 1.64E-23  | up   | ferric-chelate reductase                                               |
| 19886415                                             | BBA_03403 | 1.46  | 2.46E-07  | up   | thioredoxin-like protein                                               |
| 19892610                                             | BBA_09598 | 1.52  | 6.80E-11  | up   | oxidoreductase, short-chain dehydrogenase/reductase family             |
| 19885502                                             | BBA_02490 | 1.58  | 1.01E-14  | up   | FAD dependent oxidoreductase                                           |
| 19883459                                             | BBA_00447 | 1.65  | 8.96E-20  | up   | oxidoreductase, short chain dehydrogenase/reductase family             |
| 19883458                                             | BBA_00446 | 2.33  | 5.86E-34  | up   | oxidoreductase-like protein                                            |
| 19891701                                             | BBA_08689 | 2.60  | 1.15E-13  | up   | Putative GMC oxidoreductase                                            |
| 19892121                                             | BBA_09109 | 2.67  | 6.77E-39  | up   | Catalase-like domain, heme-dependent                                   |
| 19889198                                             | BBA_06186 | 2.98  | 4.07E-95  | up   | Catalase-like domain, heme-dependent                                   |
| 19885787                                             | BBA_02775 | 3.20  | 3.47E-87  | up   | Amine oxidase                                                          |
| 19891770                                             | BBA_08758 | 4.06  | 1.25E-68  | up   | FAD dependent oxidoreductase                                           |

|                                                                      |           |        |           |      |                                                         |
|----------------------------------------------------------------------|-----------|--------|-----------|------|---------------------------------------------------------|
| 19892767                                                             | BBA_09755 | 7.32   | 8.17E-57  | up   | epoxide hydrolase                                       |
| <b>Involved in cell wall composition and integrity</b>               |           |        |           |      |                                                         |
| 19886828                                                             | BBA_03816 | -5.18  | 2.36E-72  | down | lectin-like protein                                     |
| 19890150                                                             | BBA_07138 | -3.98  | 1.20E-93  | down | conidial wall protein                                   |
| 19888941                                                             | BBA_05929 | -3.19  | 1.18E-111 | down | WSC domain-containing protein                           |
| 19883537                                                             | BBA_00525 | -3.03  | 5.94E-71  | down | GPI anchored cell wall protein                          |
| 19885008                                                             | BBA_01996 | -2.91  | 6.67E-69  | down | GPI anchored protein, putative                          |
| 19886969                                                             | BBA_03957 | -2.05  | 2.33E-46  | down | integral membrane protein                               |
| 19892140                                                             | BBA_09128 | -1.71  | 4.24E-24  | down | Concanavalin A-like lectin/glucanase                    |
| 19886083                                                             | BBA_03071 | -1.60  | 2.36E-03  | down | hydrophobin-like protein                                |
| 19891368                                                             | BBA_08356 | -1.41  | 4.27E-20  | down | integral membrane protein (Pth11)                       |
| 19891226                                                             | BBA_08214 | -1.35  | 3.11E-11  | down | cell wall glucanotransferase Mwg1                       |
| 19892480                                                             | BBA_09468 | -1.01  | 3.75E-10  | down | WSC domain-containing protein                           |
| 19892737                                                             | BBA_09725 | 1.00   | 3.84E-08  | up   | integral membrane protein, putative                     |
| 19888820                                                             | BBA_05808 | 1.01   | 1.79E-14  | up   | cell wall protein                                       |
| 19886027                                                             | BBA_03015 | 1.11   | 4.37E-20  | up   | class I hydrophobin                                     |
| 19886427                                                             | BBA_03415 | 1.12   | 3.07E-07  | up   | calcofluor white hypersensitive protein                 |
| 19888684                                                             | BBA_05672 | 1.14   | 1.34E-15  | up   | beta-glucosidase, putative                              |
| 19886133                                                             | BBA_03121 | 1.17   | 5.51E-16  | up   | cell surface protein                                    |
| 19888274                                                             | BBA_05262 | 1.24   | 3.61E-06  | up   | WSC domain-containing protein                           |
| 19888028                                                             | BBA_05016 | 1.61   | 2.67E-03  | up   | integral membrane protein pth11                         |
| 19889388                                                             | BBA_06376 | 1.74   | 6.92E-40  | up   | glycine-rich cell wall structural protein 1             |
| 19885793                                                             | BBA_02781 | 1.75   | 2.42E-21  | up   | WSC domain-containing protein                           |
| 19888768                                                             | BBA_05756 | 1.81   | 3.78E-36  | up   | cell wall serine-threonine-rich galactomannoprotein Mp1 |
| 19885056                                                             | BBA_02044 | 1.85   | 1.95E-39  | up   | integral membrane protein, putative                     |
| 19886008                                                             | BBA_02996 | 2.31   | 1.88E-51  | up   | antigenic cell wall galactomannoprotein, putative       |
| 19892186                                                             | BBA_09174 | 3.07   | 5.45E-62  | up   | cell surface protein                                    |
| 19885614                                                             | BBA_02602 | 5.51   | 1.40E-235 | up   | cell wall protein                                       |
| 19886257                                                             | BBA_03245 | 9.64   | 4.45E-89  | up   | cell wall protein                                       |
| 19886505                                                             | BBA_03493 | 11.36  | 0.00E+00  | up   | cell wall protein                                       |
| 19886259                                                             | BBA_03247 | 11.81  | 2.77E-111 | up   | cell wall protein                                       |
| 19886258                                                             | BBA_03246 | 12.08  | 0.00E+00  | up   | cell wall protein                                       |
| <b>Involved in carbon/nitrogen metabolisms and energy conversion</b> |           |        |           |      |                                                         |
| 19891196                                                             | BBA_08184 | -15.30 | 6.73E-55  | down | glutathione-S-transferase                               |
| 19888148                                                             | BBA_05136 | -10.45 | 0.00E+00  | down | carbon catabolite repressor                             |
| 19890303                                                             | BBA_07291 | -10.10 | 0.00E+00  | down | peptidase A4 family protein                             |
| 19891234                                                             | BBA_08222 | -9.98  | 1.35E-35  | down | nonribosomal peptide synthase, putative                 |
| 19890517                                                             | BBA_07505 | -7.48  | 5.12E-168 | down | peptidase A4 family protein                             |
| 19890652                                                             | BBA_07640 | -7.11  | 4.02E-159 | down | tyrosinase-like protein                                 |
| 19891758                                                             | BBA_08746 | -5.54  | 1.22E-89  | down | glutathione-S-transferase theta, GST                    |
| 19887956                                                             | BBA_04944 | -4.76  | 1.54E-135 | down | phytoene synthase/lycopene cyclase                      |
| 19891488                                                             | BBA_08476 | -4.69  | 6.31E-206 | down | serine carboxypeptidase S28                             |
| 19883096                                                             | BBA_00084 | -4.48  | 9.67E-49  | down | Peptidase M64, IgA                                      |
| 19886895                                                             | BBA_03883 | -4.44  | 1.08E-173 | down | phytase, putative                                       |
| 19889358                                                             | BBA_06346 | -4.36  | 1.59E-141 | down | oxaloacetate acetylhydrolase                            |
| 19887401                                                             | BBA_04389 | -3.89  | 2.08E-18  | down | ATP synthase F1                                         |
| 19883804                                                             | BBA_00792 | -3.80  | 2.07E-130 | down | beta-1, 3 exoglucanase precursor                        |

|          |           |       |           |      |                                                      |
|----------|-----------|-------|-----------|------|------------------------------------------------------|
| 19887386 | BBA_04374 | -3.65 | 2.05E-29  | down | polyketide synthase, putative                        |
| 19883540 | BBA_00528 | -3.65 | 2.24E-140 | down | short chain dehydrogenase                            |
| 19892307 | BBA_09295 | -3.46 | 4.51E-62  | down | glutathione-dependent formaldehyde-activating enzyme |
| 19890757 | BBA_07745 | -3.45 | 5.27E-67  | down | Glycoside hydrolase, catalytic core                  |
| 19883628 | BBA_00616 | -3.34 | 4.04E-119 | down | glycoside hydrolase family 35                        |
| 19892439 | BBA_09427 | -2.96 | 8.42E-101 | down | serine carboxypeptidase                              |
| 19888563 | BBA_05551 | -2.90 | 2.93E-81  | down | Beta-lactamase-type transpeptidase                   |
| 19890755 | BBA_07743 | -2.86 | 1.35E-86  | down | serine peptidase, putative                           |
| 19885245 | BBA_02233 | -2.82 | 5.57E-12  | down | Glycoside hydrolase, catalytic core                  |
| 19885714 | BBA_02702 | -2.64 | 4.49E-48  | down | salicylate hydroxylase                               |
| 19886320 | BBA_03308 | -2.62 | 7.13E-10  | down | fatty acid hydroxylase superfamily protein           |
| 19893117 | BBA_10105 | -2.39 | 4.76E-53  | down | nonribosomal peptide synthase                        |
| 19888172 | BBA_05160 | -2.37 | 3.35E-67  | down | glycolipid anchored surface protein                  |
| 19891553 | BBA_08541 | -2.37 | 7.88E-27  | down | short-chain dehydrogenase                            |
| 19890686 | BBA_07674 | -2.23 | 1.16E-47  | down | Peptidase S33, tripeptidyl-peptidase                 |
| 19886777 | BBA_03765 | -2.22 | 1.94E-15  | down | thiamin biosynthesis protein (Thi-4)                 |
| 19887957 | BBA_04945 | -2.22 | 4.62E-31  | down | phytoene dehydrogenase                               |
| 19884511 | BBA_01499 | -2.20 | 3.86E-47  | down | nitrate assimilation regulatory protein nirA         |
| 19886841 | BBA_03829 | -2.20 | 3.59E-50  | down | peptidase family M3                                  |
| 19887839 | BBA_04827 | -2.15 | 8.62E-34  | down | peptide synthetase                                   |
| 19883601 | BBA_00589 | -2.08 | 7.41E-35  | down | pyruvate dehydrogenase                               |
| 19892440 | BBA_09428 | -2.03 | 5.21E-09  | down | peptidase family M3                                  |
| 19890400 | BBA_07388 | -2.01 | 4.31E-45  | down | Glycoside hydrolase, catalytic core                  |
| 19892485 | BBA_09473 | -2.00 | 2.22E-24  | down | dethiobiotin synthetase                              |
| 19888824 | BBA_05812 | -1.97 | 7.33E-40  | down | hexose transporter                                   |
| 19884669 | BBA_01657 | -1.93 | 2.34E-45  | down | prolyl oligopeptidase                                |
| 19885042 | BBA_02030 | -1.92 | 2.77E-41  | down | aldehyde dehydrogenase                               |
| 19885140 | BBA_02128 | -1.90 | 2.65E-07  | down | Glycoside hydrolase, family 31                       |
| 19883787 | BBA_00775 | -1.88 | 1.20E-41  | down | glutamate/Leucine/Phenylalanine/Valine dehydrogenase |
| 19891777 | BBA_08765 | -1.88 | 1.39E-04  | down | tyrosinase-like protein                              |
| 19888372 | BBA_05360 | -1.86 | 1.76E-36  | down | tyrosine phosphatase                                 |
| 19893181 | BBA_10169 | -1.84 | 1.70E-21  | down | ATPase protein                                       |
| 19885667 | BBA_02655 | -1.82 | 8.49E-12  | down | carbon-nitrogen hydrolase                            |
| 19885948 | BBA_02936 | -1.79 | 1.73E-16  | down | peptidase family protein                             |
| 19891910 | BBA_08898 | -1.78 | 2.81E-30  | down | Peptidase cysteine/serine, trypsin                   |
| 19887540 | BBA_04528 | -1.77 | 3.51E-04  | down | geranylgeranyl pyrophosphate synthetase              |
| 19884822 | BBA_01810 | -1.73 | 1.49E-22  | down | nonribosomal peptide synthase                        |
| 19890473 | BBA_07461 | -1.72 | 6.77E-13  | down | Peptidase S8/S53, subtilisin/kexin/sedolisin         |
| 19892194 | BBA_09182 | -1.69 | 2.14E-31  | down | Glycoside hydrolase, family 36                       |
| 19893180 | BBA_10168 | -1.69 | 1.96E-14  | down | geranylgeranyl pyrophosphate synthetase              |
| 19892175 | BBA_09163 | -1.62 | 1.45E-31  | down | carbohydrate-binding module family 21                |
| 19889439 | BBA_06427 | -1.62 | 6.82E-29  | down | glycoside hydrolase family 13                        |
| 19889094 | BBA_06082 | -1.60 | 5.58E-29  | down | ATP synthase F0                                      |
| 19888641 | BBA_05629 | -1.58 | 1.57E-27  | down | carbohydrate esterase family 9                       |
| 19885734 | BBA_02722 | -1.55 | 1.40E-20  | down | nitrate assimilation regulatory protein nirA         |
| 19889449 | BBA_06437 | -1.54 | 8.32E-24  | down | Glycoside hydrolase, catalytic core                  |
| 19891636 | BBA_08624 | -1.48 | 3.12E-19  | down | ATP synthase F0                                      |
| 19889518 | BBA_06506 | -1.46 | 1.05E-19  | down | carbohydrate esterase family 3                       |

|          |           |       |          |      |                                                            |
|----------|-----------|-------|----------|------|------------------------------------------------------------|
| 19888194 | BBA_05182 | -1.45 | 1.59E-16 | down | ATPase protein                                             |
| 19885597 | BBA_02585 | -1.44 | 1.27E-07 | down | dihydrodipicolinate synthase                               |
| 19884666 | BBA_01654 | -1.44 | 2.80E-23 | down | oxalate decarboxylase family bicupin                       |
| 19890680 | BBA_07668 | -1.44 | 4.25E-10 | down | peptidase C14                                              |
| 19888179 | BBA_05167 | -1.42 | 2.11E-05 | down | peptidase family M48                                       |
| 19884404 | BBA_01392 | -1.41 | 3.88E-17 | down | glycosyltransferase family 2                               |
| 19891254 | BBA_08242 | -1.41 | 1.78E-07 | down | glycoside hydrolase family 43 protein                      |
| 19885772 | BBA_02760 | -1.38 | 3.76E-22 | down | Beta-lactamase-type transpeptidase                         |
| 19883331 | BBA_00319 | -1.38 | 1.00E-09 | down | Peptidase S8                                               |
| 19883409 | BBA_00397 | -1.35 | 6.97E-22 | down | hexose transporter                                         |
| 19890601 | BBA_07589 | -1.33 | 2.76E-09 | down | nonribosomal peptide synthase, putative                    |
| 19891913 | BBA_08901 | -1.29 | 2.08E-14 | down | Peptidase S8/S53, subtilisin/kexin/sedolisin               |
| 19885666 | BBA_02654 | -1.29 | 6.33E-09 | down | carbon-nitrogen hydrolase                                  |
| 19885444 | BBA_02432 | -1.28 | 3.29E-14 | down | triacylglycerol lipase                                     |
| 19888997 | BBA_05985 | -1.27 | 2.90E-19 | down | nitrate assimilation regulatory protein nirA               |
| 19885415 | BBA_02403 | -1.26 | 5.89E-20 | down | glycosyl hydrolase, putative                               |
| 19890551 | BBA_07539 | -1.26 | 1.61E-15 | down | sugar hydrolase                                            |
| 19883088 | BBA_00076 | -1.25 | 6.40E-06 | down | thiamin biosynthesis protein (Thi-4)                       |
| 19886064 | BBA_03052 | -1.24 | 7.81E-14 | down | peptidase family M20/M25/M40                               |
| 19885452 | BBA_02440 | -1.24 | 1.76E-12 | down | peptidase M61 domain protein                               |
| 19883675 | BBA_00663 | -1.24 | 2.03E-10 | down | beta-lactamase family protein                              |
| 19888549 | BBA_05537 | -1.23 | 8.63E-15 | down | polysaccharide synthase Cps1p                              |
| 19884081 | BBA_01069 | -1.22 | 2.38E-15 | down | fatty-acid amide hydrolase                                 |
| 19888246 | BBA_05234 | -1.21 | 5.90E-13 | down | glycosyl hydrolase                                         |
| 19886976 | BBA_03964 | -1.19 | 2.70E-13 | down | Glycoside hydrolase, catalytic core                        |
| 19892266 | BBA_09254 | -1.19 | 9.68E-13 | down | nitrate assimilation regulatory protein nirA               |
| 19888224 | BBA_05212 | -1.18 | 7.31E-17 | down | ATP synthase F0                                            |
| 19889812 | BBA_06800 | -1.18 | 7.73E-12 | down | beta-galactosidase                                         |
| 19886628 | BBA_03616 | -1.15 | 3.88E-09 | down | polyketide synthase, putative                              |
| 19883802 | BBA_00790 | -1.14 | 4.82E-14 | down | L-serine dehydratase                                       |
| 19892334 | BBA_09322 | -1.13 | 1.23E-04 | down | chitin synthase                                            |
| 19892090 | BBA_09078 | -1.11 | 5.32E-04 | down | beta-hexosaminidase                                        |
| 19893185 | BBA_10173 | -1.10 | 4.24E-12 | down | K-3-type glutaminase                                       |
| 19889391 | BBA_06379 | -1.10 | 3.10E-08 | down | glycoside hydrolase family 16 protein                      |
| 19884097 | BBA_01085 | -1.09 | 5.29E-07 | down | peptidase family M1                                        |
| 19886006 | BBA_02994 | -1.08 | 1.79E-11 | down | glycosyltransferase family 20                              |
| 19891170 | BBA_08158 | -1.08 | 2.38E-05 | down | ATP-dependent protease La domain-containing protein        |
| 19883637 | BBA_00625 | -1.07 | 9.92E-08 | down | Glycoside hydrolase, catalytic core                        |
| 19890623 | BBA_07611 | -1.04 | 5.26E-06 | down | non-ribosomal peptide synthetase                           |
| 19884466 | BBA_01454 | -1.04 | 3.22E-12 | down | aldehyde dehydrogenase                                     |
| 19890209 | BBA_07197 | -1.03 | 3.69E-13 | down | Peptidase M19, renal dipeptidase                           |
| 19884891 | BBA_01879 | 1.01  | 3.64E-13 | up   | glycosyltransferase family 17                              |
| 19891398 | BBA_08386 | 1.01  | 8.44E-17 | up   | pyruvate decarboxylase                                     |
| 19889098 | BBA_06086 | 1.01  | 2.03E-06 | up   | glycerophosphoryl diester phosphodiesterase family protein |
| 19889166 | BBA_06154 | 1.04  | 5.49E-10 | up   | triacylglycerol lipase                                     |
| 19886983 | BBA_03971 | 1.04  | 8.49E-17 | up   | Glycoside hydrolase, family 31                             |
| 19888959 | BBA_05947 | 1.05  | 6.85E-05 | up   | short chain dehydrogenase                                  |
| 19887779 | BBA_04767 | 1.07  | 3.54E-06 | up   | glycosyl hydrolase family 76                               |
| 19890422 | BBA_07410 | 1.09  | 1.19E-13 | up   | glutathione S-transferase domain-containing protein        |

|          |           |      |          |    |                                                               |
|----------|-----------|------|----------|----|---------------------------------------------------------------|
| 19893304 | BBA_10292 | 1.10 | 2.84E-11 | up | cytochrome c oxidase assembly factor                          |
| 19889673 | BBA_06661 | 1.13 | 1.64E-04 | up | nonribosomal peptide synthase, putative                       |
| 19888684 | BBA_05672 | 1.14 | 1.34E-15 | up | beta-glucosidase, putative                                    |
| 19887603 | BBA_04591 | 1.14 | 1.24E-20 | up | glycerophosphoryl diester phosphodiesterase                   |
| 19891436 | BBA_08424 | 1.14 | 3.27E-12 | up | nonribosomal peptide synthase, putative                       |
| 19888869 | BBA_05857 | 1.15 | 7.41E-16 | up | short chain dehydrogenase                                     |
| 19885809 | BBA_02797 | 1.18 | 3.62E-16 | up | Serine family amino acid catabolism-related protein, putative |
| 19892489 | BBA_09477 | 1.19 | 3.77E-14 | up | hexose transporter                                            |
| 19886765 | BBA_03753 | 1.20 | 5.71E-22 | up | glutamate/Leucine/Phenylalanine/Valine dehydrogenase          |
| 19891531 | BBA_08519 | 1.20 | 3.46E-09 | up | lactoylglutathione lyase                                      |
| 19886156 | BBA_03144 | 1.20 | 4.11E-04 | up | short chain dehydrogenase                                     |
| 19887073 | BBA_04061 | 1.22 | 1.80E-22 | up | tyrosinase 2                                                  |
| 19890531 | BBA_07519 | 1.23 | 4.12E-12 | up | glucose sorbosone dehydrogenase                               |
| 19883775 | BBA_00763 | 1.23 | 1.10E-24 | up | glutaryl-CoA dehydrogenase                                    |
| 19891081 | BBA_08069 | 1.25 | 7.11E-06 | up | glycosyl transferase                                          |
| 19886661 | BBA_03649 | 1.30 | 1.56E-08 | up | glucose-repressible protein                                   |
| 19890955 | BBA_07943 | 1.32 | 1.98E-28 | up | glycerophosphoryl diester phosphodiesterase                   |
| 19891740 | BBA_08728 | 1.34 | 1.15E-18 | up | hexose transporter                                            |
| 19887026 | BBA_04014 | 1.35 | 9.45E-11 | up | inositol phospholipid synthesis protein Scs3p                 |
| 19889364 | BBA_06352 | 1.35 | 4.66E-04 | up | glycoside hydrolase family 76                                 |
| 19888780 | BBA_05768 | 1.50 | 3.60E-24 | up | cysteine synthase                                             |
| 19892181 | BBA_09169 | 1.50 | 2.53E-33 | up | Hexose transport-related protein, putative                    |
| 19885707 | BBA_02695 | 1.55 | 1.48E-14 | up | short chain dehydrogenase                                     |
| 19887040 | BBA_04028 | 1.56 | 1.19E-18 | up | nonribosomal peptide synthetase 10                            |
| 19891439 | BBA_08427 | 1.57 | 2.77E-33 | up | fatty acid hydroxylase superfamily protein                    |
| 19890295 | BBA_07283 | 1.58 | 2.64E-25 | up | alcohol dehydrogenase GroES-like domain-containing protein    |
| 19887700 | BBA_04688 | 1.62 | 6.35E-29 | up | glycosyl hydrolase family 76                                  |
| 19885836 | BBA_02824 | 1.62 | 5.51E-07 | up | short chain dehydrogenase                                     |
| 19892002 | BBA_08990 | 1.64 | 5.74E-34 | up | pyruvate decarboxylase                                        |
| 19889019 | BBA_06007 | 1.67 | 1.68E-26 | up | short-chain dehydrogenase                                     |
| 19886958 | BBA_03946 | 1.68 | 9.61E-28 | up | glycosyl hydrolase family 2                                   |
| 19886094 | BBA_03082 | 1.69 | 1.90E-17 | up | beta (1-3) glucanosyltransferase                              |
| 19887151 | BBA_04139 | 1.70 | 2.03E-42 | up | glutamate 5-kinase                                            |
| 19893146 | BBA_10134 | 1.70 | 5.83E-43 | up | fatty acid hydroxylase superfamily protein                    |
| 19889388 | BBA_06376 | 1.74 | 6.92E-40 | up | glycine-rich cell wall structural protein 1                   |
| 19890768 | BBA_07756 | 1.76 | 5.33E-32 | up | prolyl oligopeptidase                                         |
| 19885591 | BBA_02579 | 1.83 | 2.83E-46 | up | beta-glucuronidase                                            |
| 19892611 | BBA_09599 | 1.84 | 1.50E-44 | up | alcohol dehydrogenase GroES-like domain-containing protein    |
| 19890510 | BBA_07498 | 1.92 | 3.69E-08 | up | fatty acid-biding protein                                     |
| 19889495 | BBA_06483 | 2.01 | 1.12E-23 | up | Lactamase B                                                   |
| 19889844 | BBA_06832 | 2.06 | 1.25E-45 | up | fatty acid hydroxylase superfamily protein                    |
| 19891273 | BBA_08261 | 2.23 | 2.28E-30 | up | inositol oxygenase, putative                                  |
| 19889178 | BBA_06166 | 2.51 | 8.14E-74 | up | alcohol dehydrogenase I                                       |
| 19883819 | BBA_00807 | 2.51 | 8.36E-47 | up | glucose repressible protein Grg1                              |
| 19885593 | BBA_02581 | 2.52 | 3.69E-59 | up | fatty acid hydroxylase superfamily protein                    |
| 19888024 | BBA_05012 | 2.63 | 1.84E-17 | up | Carbohydrate kinase, thermoresistant glucokinase              |
| 19890635 | BBA_07623 | 2.75 | 1.09E-79 | up | trehalase-like protein                                        |
| 19883482 | BBA_00470 | 2.79 | 4.45E-81 | up | ATP-grasp enzyme-like protein                                 |

---

|          |           |      |           |    |                                                            |
|----------|-----------|------|-----------|----|------------------------------------------------------------|
| 19886962 | BBA_03950 | 2.91 | 3.93E-22  | up | Beta-lactamase-type transpeptidase                         |
| 19890004 | BBA_06992 | 2.92 | 7.36E-86  | up | short chain dehydrogenase                                  |
| 19890003 | BBA_06991 | 3.00 | 2.56E-96  | up | alcohol dehydrogenase GroES-like domain-containing protein |
| 19891677 | BBA_08665 | 3.11 | 9.02E-11  | up | trypsin-like protease                                      |
| 19886964 | BBA_03952 | 3.29 | 3.58E-25  | up | glutathione-dependent formaldehyde-activating, GFA         |
| 19887102 | BBA_04090 | 4.39 | 1.98E-125 | up | short-chain dehydrogenase                                  |
| 19886507 | BBA_03495 | 6.34 | 8.33E-152 | up | fatty acid hydroxylase superfamily protein                 |

#### Involved in heat tolerance

|          |           |       |          |      |                                  |
|----------|-----------|-------|----------|------|----------------------------------|
| 19885069 | BBA_02057 | -2.04 | 3.55E-19 | down | heat shock protein 30            |
| 19893292 | BBA_10280 | -1.86 | 2.56E-13 | down | DnaJ domain containing protein   |
| 19891640 | BBA_08628 | -1.56 | 4.87E-10 | down | Hsp70 family chaperone           |
| 19892721 | BBA_09709 | -1.47 | 1.96E-14 | down | Hsp70 family chaperone, putative |
| 19889530 | BBA_06518 | -1.22 | 3.17E-09 | down | DnaJ domain-containing protein   |
| 19886639 | BBA_03627 | -1.06 | 1.60E-13 | down | Hsp90 associated co-chaperone    |
| 19889861 | BBA_06849 | -1.04 | 4.88E-09 | down | thermotolerance protein          |

#### Involved in cellular transport and homeostasis

|          |           |       |           |      |                                                  |
|----------|-----------|-------|-----------|------|--------------------------------------------------|
| 19891192 | BBA_08180 | -9.48 | 0.00E+00  | down | MFS multidrug resistance transporter, putative   |
| 19887217 | BBA_04205 | -7.56 | 2.12E-175 | down | major facilitator superfamily transporter        |
| 19892091 | BBA_09079 | -6.19 | 5.81E-65  | down | major facilitator superfamily protein            |
| 19883029 | BBA_00017 | -4.81 | 1.97E-43  | down | ABC transporter                                  |
| 19886458 | BBA_03446 | -4.70 | 6.77E-26  | down | MFS transporter                                  |
| 19890043 | BBA_07031 | -4.07 | 9.95E-41  | down | MFS multidrug transporter                        |
| 19889428 | BBA_06416 | -3.91 | 1.42E-38  | down | membrane transporter                             |
| 19883552 | BBA_00540 | -3.72 | 1.85E-83  | down | MFS transporter, putative                        |
| 19883017 | BBA_00005 | -3.55 | 5.00E-120 | down | ABC transporter transmembrane region             |
| 19888845 | BBA_05833 | -3.34 | 3.43E-50  | down | major facilitator superfamily transporter        |
| 19892405 | BBA_09393 | -3.29 | 3.90E-53  | down | sugar transport protein                          |
| 19892538 | BBA_09526 | -2.98 | 1.82E-11  | down | MFS transporter                                  |
| 19885463 | BBA_02451 | -2.80 | 2.09E-84  | down | oligopeptide transporter                         |
| 19889770 | BBA_06758 | -2.58 | 7.59E-63  | down | Na/K ATPase alpha 1 subunit, putative            |
| 19883863 | BBA_00851 | -2.57 | 8.43E-23  | down | small oligopeptide transporter, OPT family       |
| 19890828 | BBA_07816 | -2.56 | 2.87E-73  | down | major facilitator superfamily transporter        |
| 19891072 | BBA_08060 | -2.54 | 7.09E-20  | down | MFS monosaccharide transporter, putative         |
| 19888461 | BBA_05449 | -2.48 | 5.49E-62  | down | metabolite transport protein GIT1                |
| 19889570 | BBA_06558 | -2.42 | 2.49E-15  | down | ABC transporter, putative                        |
| 19892856 | BBA_09844 | -2.39 | 1.99E-14  | down | vacuolar calcium ion transporter /H(+) exchanger |
| 19891253 | BBA_08241 | -2.39 | 1.03E-52  | down | general alpha-glucoside permease                 |
| 19884817 | BBA_01805 | -2.37 | 1.11E-23  | down | MFS transporter                                  |
| 19887702 | BBA_04690 | -2.21 | 3.29E-58  | down | Na,H/K antiporter P-type ATPase                  |
| 19888821 | BBA_05809 | -2.13 | 8.33E-26  | down | MFS allantoate transporter, putative             |
| 19891485 | BBA_08473 | -2.11 | 1.14E-16  | down | siderophore iron transporter mirA                |
| 19886678 | BBA_03666 | -2.08 | 4.64E-17  | down | ABC bile acid transporter, putative              |
| 19886530 | BBA_03518 | -2.02 | 1.99E-19  | down | major facilitator superfamily transporter        |
| 19883780 | BBA_00768 | -1.81 | 4.09E-36  | down | major facilitator superfamily transporter        |
| 19890148 | BBA_07136 | -1.75 | 9.20E-06  | down | major facilitator superfamily transporter        |
| 19890798 | BBA_07786 | -1.75 | 2.02E-33  | down | calcium-translocating P-type ATPase              |
| 19888853 | BBA_05841 | -1.74 | 3.09E-34  | down | ABC transporter, putative                        |

---

|          |           |       |          |      |                                                     |
|----------|-----------|-------|----------|------|-----------------------------------------------------|
| 19884513 | BBA_01501 | -1.72 | 4.54E-19 | down | major facilitator superfamily transporter           |
| 19892135 | BBA_09123 | -1.69 | 8.40E-10 | down | multidrug resistance protein MDR, putative          |
| 19883837 | BBA_00825 | -1.69 | 1.07E-35 | down | Major Facilitator Superfamily protein               |
| 19888637 | BBA_05625 | -1.69 | 1.54E-18 | down | metal ion transporter metal ion transporter         |
| 19885837 | BBA_02825 | -1.69 | 7.65E-10 | down | proline transporter                                 |
| 19885385 | BBA_02373 | -1.68 | 2.49E-08 | down | major facilitator superfamily transporter           |
| 19889351 | BBA_06339 | -1.58 | 9.48E-18 | down | major facilitator superfamily transporter           |
| 19892348 | BBA_09336 | -1.56 | 4.65E-07 | down | MFS quinate transporter, putative                   |
| 19893068 | BBA_10056 | -1.52 | 1.02E-25 | down | Amino acid/polyamine transporter I                  |
| 19889873 | BBA_06861 | -1.51 | 4.32E-08 | down | inner membrane transport protein yfaV               |
| 19892688 | BBA_09676 | -1.46 | 1.82E-06 | down | MFS allantoate transporter                          |
| 19890673 | BBA_07661 | -1.46 | 1.49E-23 | down | potassium/sodium efflux P-type ATPase               |
| 19883956 | BBA_00944 | -1.46 | 1.59E-11 | down | nitrite transporter                                 |
| 19884409 | BBA_01397 | -1.44 | 8.75E-04 | down | ABC multidrug transporter, putative                 |
| 19883195 | BBA_00183 | -1.44 | 2.63E-07 | down | major facilitator superfamily transporter           |
| 19889168 | BBA_06156 | -1.36 | 2.70E-20 | down | sulfate transporter                                 |
| 19884348 | BBA_01336 | -1.33 | 1.33E-17 | down | bicyclomycin resistance protein                     |
| 19889082 | BBA_06070 | -1.32 | 6.59E-05 | down | ABC multidrug transporter                           |
| 19886416 | BBA_03404 | -1.32 | 2.73E-06 | down | MFS multidrug transporter                           |
| 19886455 | BBA_03443 | -1.29 | 1.58E-05 | down | ABC transporter                                     |
| 19884224 | BBA_01212 | -1.29 | 1.59E-18 | down | sodium/calcium exchanger protein                    |
| 19889287 | BBA_06275 | -1.29 | 4.41E-19 | down | general amino acid permease AGP2                    |
| 19887836 | BBA_04824 | -1.27 | 2.17E-11 | down | ABC transporter with duplicated ATPase domains      |
| 19889432 | BBA_06420 | -1.25 | 1.54E-18 | down | oligopeptide transporter                            |
| 19892364 | BBA_09352 | -1.25 | 3.05E-15 | down | MFS allantoate transporter, putative                |
| 19891320 | BBA_08308 | -1.25 | 4.98E-18 | down | OPT oligopeptide transporter                        |
| 19888623 | BBA_05611 | -1.24 | 1.65E-16 | down | copper-transporting ATPase                          |
| 19884326 | BBA_01314 | -1.22 | 3.30E-08 | down | peptide transporter MTD1                            |
| 19884942 | BBA_01930 | -1.22 | 3.75E-17 | down | OPT peptide transporter Mtd1                        |
| 19891632 | BBA_08620 | -1.21 | 1.53E-13 | down | drug resistance protein                             |
| 19888406 | BBA_05394 | -1.20 | 7.38E-14 | down | C4-dicarboxylate transporter/malic acid transporter |
| 19886578 | BBA_03566 | -1.19 | 9.18E-18 | down | transmembrane amino acid transporter                |
| 19888748 | BBA_05736 | -1.19 | 8.86E-05 | down | MFS monosaccharide transporter (Hxt8)               |
| 19888398 | BBA_05386 | -1.16 | 2.93E-12 | down | major facilitator superfamily transporter           |
| 19885607 | BBA_02595 | -1.12 | 1.52E-07 | down | major facilitator superfamily transporter           |
| 19885827 | BBA_02815 | -1.12 | 1.53E-08 | down | ABC transporter                                     |
| 19886191 | BBA_03179 | -1.11 | 2.32E-10 | down | calcium-transporting ATPase                         |
| 19891518 | BBA_08506 | -1.08 | 1.26E-14 | down | multidrug and toxin extrusion protein               |
| 19887969 | BBA_04957 | -1.08 | 1.38E-09 | down | potassium/sodium efflux P-type ATPase               |
| 19883860 | BBA_00848 | -1.06 | 4.38E-10 | down | copper homeostasis protein cutC                     |
| 19890561 | BBA_07549 | -1.05 | 7.77E-07 | down | MFS transporter                                     |
| 19885612 | BBA_02600 | -1.05 | 3.73E-04 | down | MFS multidrug transporter                           |
| 19889480 | BBA_06468 | -1.04 | 7.62E-09 | down | ABC transporter                                     |
| 19889572 | BBA_06560 | -1.02 | 1.54E-11 | down | ABC transporter                                     |
| 19888839 | BBA_05827 | -1.02 | 2.13E-11 | down | siderophore iron transporter                        |
| 19891800 | BBA_08788 | -1.00 | 6.72E-06 | down | MFS sugar transporter, putative                     |
| 19885917 | BBA_02905 | 1.00  | 4.18E-04 | up   | protein transport protein YOS1                      |
| 19889843 | BBA_06831 | 1.01  | 1.06E-08 | up   | major facilitator superfamily transporter           |
| 19890760 | BBA_07748 | 1.01  | 1.00E-10 | up   | ABC transporter                                     |

|          |           |      |           |    |                                                              |
|----------|-----------|------|-----------|----|--------------------------------------------------------------|
| 19890579 | BBA_07567 | 1.02 | 6.62E-12  | up | nonspecific lipid-transfer protein                           |
| 19889954 | BBA_06942 | 1.02 | 1.53E-05  | up | MFS multidrug transporter, putative                          |
| 19889435 | BBA_06423 | 1.03 | 3.91E-14  | up | cation transport ATPase                                      |
| 19886596 | BBA_03584 | 1.06 | 2.37E-09  | up | ABC transporter                                              |
| 19887508 | BBA_04496 | 1.07 | 3.23E-06  | up | putative sugar transporter                                   |
| 19887052 | BBA_04040 | 1.08 | 1.13E-10  | up | MFS monocarboxylate transporter                              |
| 19886472 | BBA_03460 | 1.08 | 1.25E-19  | up | phosphatidylinositol transfer protein CSR1                   |
| 19884295 | BBA_01283 | 1.09 | 1.11E-19  | up | major facilitator superfamily transporter                    |
| 19886487 | BBA_03475 | 1.09 | 2.36E-07  | up | bicyclomycin resistance protein                              |
| 19884705 | BBA_01693 | 1.09 | 1.03E-19  | up | major facilitator superfamily transporter                    |
| 19888284 | BBA_05272 | 1.16 | 8.31E-21  | up | ABC transporter                                              |
| 19888678 | BBA_05666 | 1.16 | 3.77E-16  | up | MFS transporter                                              |
| 19891483 | BBA_08471 | 1.18 | 2.51E-08  | up | MFS allantoate transporter, putative                         |
| 19891575 | BBA_08563 | 1.19 | 1.71E-19  | up | ABC transporter, putative                                    |
| 19886013 | BBA_03001 | 1.20 | 1.85E-07  | up | ABC-type Fe <sup>3+</sup> transport system                   |
| 19884572 | BBA_01560 | 1.22 | 3.79E-11  | up | triose-phosphate transporter                                 |
| 19884492 | BBA_01480 | 1.29 | 6.00E-23  | up | major facilitator superfamily transporter                    |
| 19883563 | BBA_00551 | 1.30 | 5.72E-23  | up | major facilitator superfamily transporter                    |
| 19888752 | BBA_05740 | 1.30 | 6.81E-10  | up | major facilitator superfamily transporter                    |
| 19883456 | BBA_00444 | 1.31 | 2.63E-24  | up | nucleoside transporter, putative                             |
| 19883295 | BBA_00283 | 1.32 | 1.60E-06  | up | membrane transporter                                         |
| 19890727 | BBA_07715 | 1.34 | 1.73E-12  | up | major facilitator superfamily transporter                    |
| 19890161 | BBA_07149 | 1.41 | 1.22E-07  | up | major facilitator superfamily transporter                    |
| 19892203 | BBA_09191 | 1.41 | 8.88E-10  | up | MIP transporter                                              |
| 19889774 | BBA_06762 | 1.46 | 6.94E-25  | up | ctr copper transporter                                       |
| 19886122 | BBA_03110 | 1.47 | 9.35E-17  | up | OPT oligopeptide transporter                                 |
| 19885773 | BBA_02761 | 1.48 | 1.18E-27  | up | Major facilitator superfamily, general substrate transporter |
| 19886303 | BBA_03291 | 1.49 | 1.44E-34  | up | MFS monocarboxylate transporter                              |
| 19885303 | BBA_02291 | 1.52 | 1.21E-06  | up | V-type ATPase                                                |
| 19886063 | BBA_03051 | 1.58 | 8.85E-16  | up | polyamine transporter 3                                      |
| 19892731 | BBA_09719 | 1.62 | 1.91E-26  | up | MFS toxin efflux pump (AflT)                                 |
| 19890397 | BBA_07385 | 1.64 | 3.19E-37  | up | MFS transporter                                              |
| 19886245 | BBA_03233 | 1.66 | 5.10E-27  | up | GDP-mannose transporter                                      |
| 19892758 | BBA_09746 | 1.67 | 8.24E-08  | up | major facilitator superfamily transporter                    |
| 19884115 | BBA_01103 | 1.68 | 2.74E-15  | up | ABC transporter                                              |
| 19886885 | BBA_03873 | 1.69 | 2.13E-30  | up | calcium/proton exchanger                                     |
| 19890293 | BBA_07281 | 1.80 | 2.54E-16  | up | urea active transporter                                      |
| 19887045 | BBA_04033 | 1.88 | 9.91E-25  | up | General substrate transporter                                |
| 19891189 | BBA_08177 | 2.01 | 1.20E-19  | up | cation transporter                                           |
| 19890132 | BBA_07120 | 2.06 | 1.06E-43  | up | major facilitator superfamily transporter                    |
| 19885211 | BBA_02199 | 2.19 | 1.84E-32  | up | neutral amino acid transporter                               |
| 19886590 | BBA_03578 | 2.21 | 5.16E-55  | up | siderophore iron transporter mirB                            |
| 19891440 | BBA_08428 | 2.26 | 8.94E-36  | up | efflux pump antibiotic resistance protein                    |
| 19893278 | BBA_10266 | 2.66 | 1.15E-30  | up | sugar transporter                                            |
| 19888332 | BBA_05320 | 3.12 | 9.95E-81  | up | plasma membrane zinc ion transporter, putative               |
| 19886224 | BBA_03212 | 3.17 | 9.30E-119 | up | phthalate transporter                                        |
| 19888779 | BBA_05767 | 3.24 | 2.62E-126 | up | tetracycline efflux protein (otrB)                           |
| 19885944 | BBA_02932 | 3.25 | 1.76E-58  | up | General substrate transporter                                |
| 19892313 | BBA_09301 | 3.28 | 7.23E-12  | up | amino acid transporter                                       |

|                                               |           |       |           |      |                                                         |
|-----------------------------------------------|-----------|-------|-----------|------|---------------------------------------------------------|
| 19889285                                      | BBA_06273 | 3.32  | 4.12E-73  | up   | OPT oligopeptide transporter                            |
| 19883811                                      | BBA_00799 | 3.92  | 7.77E-170 | up   | phosphate transporter                                   |
| 19886260                                      | BBA_03248 | 12.05 | 0.00E+00  | up   | major facilitator superfamily transporter               |
| <b>Involved in transcriptional regulation</b> |           |       |           |      |                                                         |
| 19890648                                      | BBA_07636 | -6.98 | 4.40E-66  | down | C6 transcription factor                                 |
| 19885603                                      | BBA_02591 | -3.39 | 1.84E-93  | down | C6 zinc finger domain protein                           |
| 19888302                                      | BBA_05290 | -2.93 | 7.01E-45  | down | fungus specific transcription factor                    |
| 19887098                                      | BBA_04086 | -2.91 | 5.36E-52  | down | Zn2C6-type transcription factor                         |
| 19892310                                      | BBA_09298 | -2.81 | 9.66E-47  | down | Zn(II)2Cys6 transcription factor                        |
| 19890066                                      | BBA_07054 | -2.75 | 2.32E-57  | down | C6 zinc finger domain-containing protein                |
| 19883871                                      | BBA_00859 | -2.41 | 2.63E-65  | down | Putative Zn(II)2Cys6 transcription factor               |
| 19883474                                      | BBA_00462 | -2.37 | 1.81E-51  | down | APSES transcription factor Xbp1                         |
| 19887174                                      | BBA_04162 | -2.33 | 7.95E-46  | down | ZIP zinc/iron transporter                               |
| 19891193                                      | BBA_08181 | -2.27 | 2.23E-26  | down | fungus specific transcription factor                    |
| 19883856                                      | BBA_00844 | -2.17 | 1.08E-44  | down | fungus specific transcription factor                    |
| 19889132                                      | BBA_06120 | -2.10 | 5.23E-43  | down | C2H2 type zinc finger domain protein                    |
| 19884113                                      | BBA_01101 | -1.87 | 5.09E-10  | down | C6 zinc finger domain-containing protein                |
| 19892936                                      | BBA_09924 | -1.86 | 2.27E-10  | down | zinc finger protein                                     |
| 19888235                                      | BBA_05223 | -1.77 | 1.32E-17  | down | fungus specific transcription factor                    |
| 19891535                                      | BBA_08523 | -1.77 | 4.21E-13  | down | fungus specific transcription factor domain protein     |
| 19885579                                      | BBA_02567 | -1.74 | 7.05E-37  | down | nitrogen assimilation transcription factor nirA         |
| 19883251                                      | BBA_00239 | -1.60 | 1.00E-13  | down | transcription factor Domain protein family              |
| 19890903                                      | BBA_07891 | -1.56 | 1.15E-20  | down | bZIP transcription factor                               |
| 19887334                                      | BBA_04322 | -1.53 | 3.06E-19  | down | transcription factor                                    |
| 19892563                                      | BBA_09551 | -1.52 | 6.33E-12  | down | C6 transcription factor, putative                       |
| 19890721                                      | BBA_07709 | -1.46 | 2.53E-13  | down | transcription factor RfeG                               |
| 19887342                                      | BBA_04330 | -1.45 | 3.06E-21  | down | BZIP-type transcription factor                          |
| 19888832                                      | BBA_05820 | -1.41 | 1.16E-14  | down | C6 transcription factor, putative                       |
| 19884242                                      | BBA_01230 | -1.39 | 2.90E-19  | down | ZIP Zinc transporter                                    |
| 19890143                                      | BBA_07131 | -1.37 | 8.00E-06  | down | C3HC4 type (RING finger) zinc finger containing protein |
| 19887970                                      | BBA_04958 | -1.37 | 7.70E-18  | down | RadR putative transcriptional regulator                 |
| 19887772                                      | BBA_04760 | -1.36 | 3.80E-08  | down | Putative Zn(II)2Cys6 transcription factor               |
| 19890413                                      | BBA_07401 | -1.29 | 7.79E-10  | down | fungus specific transcription factor                    |
| 19890083                                      | BBA_07071 | -1.29 | 1.24E-14  | down | C6 zinc finger domain-containing protein                |
| 19892424                                      | BBA_09412 | -1.29 | 1.47E-18  | down | transcription factor                                    |
| 19888974                                      | BBA_05962 | -1.28 | 2.30E-16  | down | fungus specific transcription factor, putative          |
| 19889069                                      | BBA_06057 | -1.27 | 7.27E-20  | down | Fungal transcriptional regulatory protein               |
| 19889294                                      | BBA_06282 | -1.26 | 1.03E-17  | down | fungus specific transcription factor                    |
| 19883724                                      | BBA_00712 | -1.25 | 1.88E-11  | down | putative C6-zinc finger TF, regulator of conidiation    |
| 19886189                                      | BBA_03177 | -1.22 | 5.84E-05  | down | fungus specific transcription factor                    |
| 19884514                                      | BBA_01502 | -1.21 | 6.18E-12  | down | fungus specific transcription factor                    |
| 19883740                                      | BBA_00728 | -1.20 | 5.97E-18  | down | zinc-binding dehydrogenase                              |
| 19885362                                      | BBA_02350 | -1.20 | 8.32E-09  | down | zinc finger protein 76 (expressed in testis)            |
| 19889076                                      | BBA_06064 | -1.20 | 1.29E-08  | down | GATA zinc finger protein                                |
| 19888310                                      | BBA_05298 | -1.14 | 2.94E-07  | down | DNA repair and transcription factor Ada, putative       |
| 19884453                                      | BBA_01441 | -1.14 | 1.16E-07  | down | zinc finger protein SFP1                                |
| 19886026                                      | BBA_03014 | -1.13 | 1.39E-09  | down | bZIP transcription factor                               |
| 19888635                                      | BBA_05623 | -1.13 | 1.02E-05  | down | zinc finger protein                                     |

|          |           |       |           |      |                                                  |
|----------|-----------|-------|-----------|------|--------------------------------------------------|
| 19883117 | BBA_00105 | -1.13 | 4.91E-03  | down | Putative Zn(II)2Cys6 transcription factor        |
| 19886476 | BBA_03464 | -1.09 | 1.39E-12  | down | C6 finger domain protein                         |
| 19890939 | BBA_07927 | -1.06 | 1.84E-12  | down | C2 domain-containing protein                     |
| 19887315 | BBA_04303 | -1.02 | 4.63E-07  | down | LYAR-type C2HC zinc finger protein               |
| 19890312 | BBA_07300 | -1.02 | 1.96E-04  | down | C6 transcription factor                          |
| 19891664 | BBA_08652 | -1.01 | 2.63E-08  | down | transcription factor tfiic complex subunit sfc6  |
| 19892345 | BBA_09333 | -1.01 | 6.17E-04  | down | C2H2 finger domain protein, putative             |
| 19890105 | BBA_07093 | -1.01 | 1.55E-04  | down | RING finger protein                              |
| 19892415 | BBA_09403 | 1.05  | 4.78E-04  | up   | bZIP transcription factor                        |
| 19892709 | BBA_09697 | 1.05  | 4.65E-08  | up   | C2H2 transcription factor                        |
| 19885519 | BBA_02507 | 1.06  | 7.12E-20  | up   | fungus specific transcription factor             |
| 19892061 | BBA_09049 | 1.21  | 1.41E-17  | up   | RING finger domain protein                       |
| 19884690 | BBA_01678 | 1.27  | 3.85E-14  | up   | ZIP Zinc transporter family protein              |
| 19892016 | BBA_09004 | 1.41  | 8.99E-21  | up   | Putative C2H2 finger domain transcription factor |
| 19893237 | BBA_10225 | 1.42  | 5.80E-19  | up   | C6 finger domain protein, putative               |
| 19890430 | BBA_07418 | 1.47  | 4.26E-04  | up   | fungus specific transcription factor             |
| 19884713 | BBA_01701 | 1.50  | 3.65E-21  | up   | C6 finger domain protein                         |
| 19889362 | BBA_06350 | 1.68  | 3.96E-17  | up   | C6 transcription factor                          |
| 19887307 | BBA_04295 | 1.85  | 2.53E-37  | up   | C2 domain-containing protein                     |
| 19887101 | BBA_04089 | 2.42  | 6.78E-49  | up   | zinc-binding dehydrogenase                       |
| 19892448 | BBA_09436 | 2.72  | 8.67E-47  | up   | zinc finger-like protein                         |
| 19885023 | BBA_02011 | 2.85  | 1.96E-13  | up   | zinc finger protein Nv-ZicA                      |
| 19892449 | BBA_09437 | 3.06  | 5.65E-30  | up   | C2H2 finger domain protein, putative             |
| 19892640 | BBA_09628 | 3.23  | 5.65E-21  | up   | C6 zinc finger domain-containing protein         |
| 19891451 | BBA_08439 | 3.23  | 2.56E-96  | up   | zinc-binding dehydrogenase                       |
| 19892966 | BBA_09954 | 3.42  | 3.45E-122 | up   | C2H2 finger domain protein, putative             |
| 19888690 | BBA_05678 | 3.54  | 4.54E-59  | up   | nitrogen assimilation transcription factor nirA  |
| 19891979 | BBA_08967 | 3.73  | 1.28E-92  | up   | fungus zinc cluster transcription factor         |
| 19885778 | BBA_02766 | 3.74  | 6.90E-49  | up   | BTB domain transcription factor                  |
| 19890354 | BBA_07342 | 3.79  | 1.65E-19  | up   | C6 transcription factor                          |
| 19892447 | BBA_09435 | 5.36  | 1.22E-190 | up   | C6 zinc finger domain-containing protein         |

#### Involved in posttranslational modifications and chromatin remodeling

|          |           |       |           |      |                                          |
|----------|-----------|-------|-----------|------|------------------------------------------|
| 19892473 | BBA_09461 | -3.29 | 1.20E-121 | down | methyltransferase-like protein           |
| 19889340 | BBA_06328 | -2.99 | 1.24E-85  | down | methyltransferase-like protein           |
| 19892474 | BBA_09462 | -2.72 | 4.54E-85  | down | methyltransferase-like protein           |
| 19888404 | BBA_05392 | -2.65 | 2.26E-65  | down | O-methyltransferase-like protein         |
| 19891513 | BBA_08501 | -2.25 | 3.21E-58  | down | putative SAM-dependent methyltransferase |
| 19887670 | BBA_04658 | -2.16 | 6.78E-56  | down | methyltransferase-like protein           |
| 19886129 | BBA_03117 | -2.08 | 4.71E-21  | down | Acyl-CoA N-acyltransferase               |
| 19885406 | BBA_02394 | -2.01 | 2.10E-18  | down | methyltransferase-like protein           |
| 19892472 | BBA_09460 | -1.91 | 2.11E-19  | down | SAM dependent carboxyl methyltransferase |
| 19886450 | BBA_03438 | -1.82 | 4.43E-35  | down | Acyl-CoA N-acyltransferase               |
| 19883946 | BBA_00934 | -1.79 | 2.78E-23  | down | sterigmatocystin 8-O-methyltransferase   |
| 19885171 | BBA_02159 | -1.77 | 1.59E-28  | down | homoserine O-acetyltransferase           |
| 19884161 | BBA_01149 | -1.61 | 2.74E-21  | down | alpha-1,3-mannosyltransferase CMT1       |
| 19892887 | BBA_09875 | -1.49 | 1.05E-02  | down | O-methyltransferase, family 3            |
| 19891312 | BBA_08300 | -1.44 | 7.25E-13  | down | arylamine N-acetyltransferase 1          |
| 19889339 | BBA_06327 | -1.39 | 4.03E-03  | down | methyltransferase-like protein           |

|          |           |       |           |      |                                                            |
|----------|-----------|-------|-----------|------|------------------------------------------------------------|
| 19885193 | BBA_02181 | -1.38 | 1.31E-24  | down | ornithine carbamoyltransferase                             |
| 19883054 | BBA_00042 | -1.37 | 3.51E-23  | down | homoserine acetyltransferase family protein                |
| 19885007 | BBA_01995 | -1.36 | 3.10E-22  | down | methyltransferase-like protein                             |
| 19893069 | BBA_10057 | -1.28 | 4.95E-16  | down | Acyl-CoA N-acyltransferase                                 |
| 19889315 | BBA_06303 | -1.25 | 3.85E-17  | down | methyltransferase domain-containing protein                |
| 19891551 | BBA_08539 | -1.20 | 8.69E-04  | down | putative SAM-dependent methyltransferase                   |
| 19887674 | BBA_04662 | -1.19 | 1.23E-16  | down | SAM-dependent methyltransferase                            |
| 19891262 | BBA_08250 | -1.19 | 1.91E-15  | down | methyltransferase-like protein                             |
| 19887972 | BBA_04960 | -1.15 | 7.57E-04  | down | Methyltransferase type 11                                  |
| 19889573 | BBA_06561 | -1.14 | 8.42E-13  | down | histone-lysine N-methyltransferase                         |
| 19884431 | BBA_01419 | -1.11 | 1.23E-14  | down | adenine phosphoribosyltransferase                          |
| 19888070 | BBA_05058 | -1.10 | 1.69E-08  | down | acyltransferase-like protein                               |
| 19891505 | BBA_08493 | -1.06 | 6.83E-07  | down | Acyl-CoA N-acyltransferase                                 |
| 19890647 | BBA_07635 | -1.04 | 2.08E-08  | down | SAM-dependent methyltransferase                            |
| 19888922 | BBA_05910 | -1.02 | 6.68E-10  | down | isoprenylcysteine carboxyl methyltransferase               |
| 19888459 | BBA_05447 | 1.08  | 8.96E-07  | up   | S-adenosylmethionine-dependent methyltransferase, putative |
| 19891590 | BBA_08578 | 1.08  | 8.64E-09  | up   | Acyl-CoA N-acyltransferase                                 |
| 19890856 | BBA_07844 | 1.09  | 5.72E-15  | up   | O-methyltransferase, family 3                              |
| 19891937 | BBA_08925 | 1.12  | 1.50E-09  | up   | O-methyltransferase, family 3                              |
| 19886592 | BBA_03580 | 1.13  | 4.27E-21  | up   | FkbM family methyltransferase                              |
| 19885374 | BBA_02362 | 1.13  | 2.07E-18  | up   | C-5 cytosine-specific DNA methylase                        |
| 19892756 | BBA_09744 | 1.31  | 4.14E-09  | up   | O-methyltransferase-like protein                           |
| 19883450 | BBA_00438 | 1.35  | 2.03E-09  | up   | GNAT family acetyltransferase, putative                    |
| 19885925 | BBA_02913 | 1.47  | 1.05E-22  | up   | methyltransferase domain-containing protein                |
| 19891579 | BBA_08567 | 1.54  | 5.78E-22  | up   | methyltransferase domain-containing protein                |
| 19888129 | BBA_05117 | 1.55  | 1.15E-06  | up   | SET domain-containing protein                              |
| 19892510 | BBA_09498 | 1.56  | 2.64E-07  | up   | FkbM family methyltransferase                              |
| 19883105 | BBA_00093 | 1.66  | 9.43E-09  | up   | methyltransferase domain-containing protein                |
| 19886594 | BBA_03582 | 1.68  | 7.52E-40  | up   | O-methyltransferase family protein                         |
| 19892450 | BBA_09438 | 2.21  | 3.87E-08  | up   | Methyltransferase type 11                                  |
| 19888160 | BBA_05148 | 2.24  | 2.67E-26  | up   | Acyl-CoA N-acyltransferase                                 |
| 19893156 | BBA_10144 | 3.02  | 2.18E-41  | up   | Methyltransferase type 11                                  |
| 19893267 | BBA_10255 | 4.74  | 8.96E-116 | up   | Methyltransferase type 11                                  |

#### Involved in DNA splicing, repair, reverse transcription and translation

|          |           |       |          |      |                                                   |
|----------|-----------|-------|----------|------|---------------------------------------------------|
| 19890679 | BBA_07667 | -5.07 | 2.79E-49 | down | reverse transcriptase                             |
| 19893368 | BBA_10356 | -1.68 | 1.47E-15 | down | reverse transcriptase                             |
| 19884676 | BBA_01664 | -1.60 | 1.71E-28 | down | DNA photolyase                                    |
| 19883598 | BBA_00586 | -1.53 | 8.19E-26 | down | DNA polymerase POL4, putative                     |
| 19892217 | BBA_09205 | -1.50 | 1.06E-11 | down | reverse transcriptase                             |
| 19890784 | BBA_07772 | -1.43 | 2.92E-08 | down | reverse transcriptase                             |
| 19884028 | BBA_01016 | -1.35 | 1.02E-21 | down | Ribonuclease/ribotoxin                            |
| 19885436 | BBA_02424 | -1.31 | 8.08E-14 | down | DASH family cryptochrome                          |
| 19885818 | BBA_02806 | -1.30 | 8.81E-21 | down | splicing factor Spf30                             |
| 19888310 | BBA_05298 | -1.14 | 2.94E-07 | down | DNA repair and transcription factor Ada, putative |
| 19889890 | BBA_06878 | -1.12 | 7.69E-14 | down | DNA repair protein (Rad57), putative              |
| 19884262 | BBA_01250 | -1.08 | 4.86E-05 | down | DNA polymerase II large subunit-like protein      |
| 19893365 | BBA_10353 | -1.06 | 2.29E-06 | down | reverse transcriptase                             |
| 19893308 | BBA_10296 | 1.06  | 7.55E-10 | up   | reverse transcriptase                             |

|                                       |           |       |          |      |                                                         |
|---------------------------------------|-----------|-------|----------|------|---------------------------------------------------------|
| 19887384                              | BBA_04372 | 1.08  | 1.01E-16 | up   | DNA repair protein (Rad57), putative                    |
| 19884046                              | BBA_01034 | 1.14  | 1.73E-16 | up   | DNA photolyase                                          |
| 19883204                              | BBA_00192 | 1.21  | 1.64E-07 | up   | Ribonuclease H1                                         |
| 19892435                              | BBA_09423 | 1.69  | 4.05E-08 | up   | translation factor (SUA5)                               |
| 19887116                              | BBA_04104 | 3.79  | 1.48E-98 | up   | DNA-binding protein                                     |
| <b>Involved in cellular signaling</b> |           |       |          |      |                                                         |
| 19888236                              | BBA_05224 | -7.64 | 2.89E-60 | down | protein phosphatase 2C                                  |
| 19893363                              | BBA_10351 | -3.18 | 1.85E-28 | down | serine/threonine protein kinase Japonica Group          |
| 19891255                              | BBA_08243 | -2.78 | 1.15E-75 | down | calcineurin-like phosphoesterase                        |
| 19886774                              | BBA_03762 | -2.67 | 4.88E-20 | down | protein kinase subdomain-containing protein             |
| 19886234                              | BBA_03222 | -2.60 | 2.57E-30 | down | serine/threonine protein kinase                         |
| 19892247                              | BBA_09235 | -2.31 | 5.39E-54 | down | putative dual specificity protein kinase pom1           |
| 19892930                              | BBA_09918 | -1.88 | 2.40E-23 | down | protein kinase domain-containing protein                |
| 19893252                              | BBA_10240 | -1.70 | 2.03E-28 | down | histidine acid phosphatase                              |
| 19890942                              | BBA_07930 | -1.68 | 1.22E-18 | down | protein kinase subdomain-containing protein             |
| 19893088                              | BBA_10076 | -1.67 | 1.55E-11 | down | CAMK family protein kinase                              |
| 19885329                              | BBA_02317 | -1.60 | 8.98E-20 | down | serine/threonine-protein kinase nak1                    |
| 19887082                              | BBA_04070 | -1.50 | 4.38E-12 | down | calcium/calmodulin dependent protein kinase C, putative |
| 19893364                              | BBA_10352 | -1.49 | 2.02E-13 | down | protein kinase domain-containing protein                |
| 19885628                              | BBA_02616 | -1.49 | 1.34E-07 | down | receptor-interacting serine/threonine-protein kinase    |
| 19888600                              | BBA_05588 | -1.42 | 2.85E-18 | down | MAP kinase kinase skh1/pek1                             |
| 19884107                              | BBA_01095 | -1.27 | 3.02E-16 | down | MAP kinase kinase 1                                     |
| 19889919                              | BBA_06907 | -1.26 | 6.14E-19 | down | histidine acid phosphatase                              |
| 19885572                              | BBA_02560 | -1.24 | 1.31E-04 | down | dual specificity phosphatase Yvh1, putative             |
| 19888798                              | BBA_05786 | -1.19 | 8.59E-07 | down | protein kinase domain-containing protein                |
| 19885080                              | BBA_02068 | -1.12 | 1.51E-13 | down | calcineurin-like phosphoesterase                        |
| 19886503                              | BBA_03491 | -1.08 | 3.35E-13 | down | tousled-like kinase                                     |
| 19889532                              | BBA_06520 | -1.04 | 1.14E-06 | down | calcineurin-like phosphoesterase                        |
| 19885115                              | BBA_02103 | 1.06  | 4.03E-07 | up   | spindle assembly checkpoint kinase                      |
| 19890578                              | BBA_07566 | 1.10  | 7.86E-16 | up   | histidinol phosphate phosphatase HisJ family protein    |
| 19890596                              | BBA_07584 | 1.21  | 2.21E-13 | up   | MAP kinase kinase skh1/pek1                             |
| 19885004                              | BBA_01992 | 1.27  | 4.72E-26 | up   | calcineurin-like phosphoesterase                        |
| 19889610                              | BBA_06598 | 1.32  | 8.22E-08 | up   | histidine acid phosphatase                              |
| 19892972                              | BBA_09960 | 1.52  | 7.39E-18 | up   | Rho-associated protein kinase, putative                 |
| 19890791                              | BBA_07779 | 1.52  | 2.27E-13 | up   | serine-threonine protein kinase                         |
| 19887733                              | BBA_04721 | 2.03  | 4.91E-19 | up   | serine protein kinase                                   |
| 19892055                              | BBA_09043 | 2.72  | 9.75E-38 | up   | mitogen-activated protein kinase sty1                   |
